# Supplementary material for: Metal-free nitro-carbocyclization of 1,6-enynes with tBuONO and TEMPO
Source: Royal Society of Chemistry journal article supplement (doi:10.1039/c5cc00872g), 2015-01-01

# Metal-free nitro-carbocyclization of 1,6-enyne with <sup>t</sup>BuONO and TEMPO

*Xin-Hua Hao, Pin-Gao, Xian-Rong Song, Yi-Feng Qiu, Dong-Po Jin, Xue-Yuan Liu and Yong-Min Liang*<sup>a</sup>

<sup>a</sup>State Key Laboratory of Applied Organic Chemistry, Lanzhou University, Lanzhou 730000.

China.E-mail: [liangym@lzu.edu.cn](mailto:liangym@lzu.edu.cn)

## Table of Contents

|                                                                                                   |         |
|---------------------------------------------------------------------------------------------------|---------|
| 1 General Remarks                                                                                 | S2      |
| 2 General Procedure for the nitration/cyclization of 1,6-enynes with <sup>t</sup> BuONO and TEMPO | S2      |
| 3 Preparation of Starting Materials                                                               | S2      |
| 4.Characterization Data of 1,6-Enynes 1a–1w                                                       | S2-S7   |
| 5.Characterization Data of Products 2a–2y                                                         | S7-S14  |
| 6.The Crystal Structure of Product 2a                                                             | S14     |
| 7. References                                                                                     | S15     |
| 8. <sup>1</sup> H NMR and <sup>13</sup> C NMR Spectra of the 1,6-Enynes 1b–1s                     | S15-S32 |
| 9. <sup>1</sup> H NMR and <sup>13</sup> C NMR Spectra of the Products 2a–2q, 2u–2y, 2aa           | S53-S55 |

## 1. General remarks

For product purification by flash column chromatography, silica gel (200–300 mesh).  $^1\text{H}$  NMR spectra were recorded on 400 MHz in  $\text{CDCl}_3$  and  $^{13}\text{C}$  NMR spectra were recorded on 100 MHz in  $\text{CDCl}_3$ . Chemical shifts (ppm) were recorded with tetramethylsilane (TMS) as the internal reference standard. Multiplicities are given as: s (singlet), d (doublet), t (triplet), dd (doublet of doublets), q (quartet) or m (multiplet). IR spectra were recorded on a FT-IR spectrometer and only major peaks are reported in  $\text{cm}^{-1}$ . HR-MS was obtained using a Q-TOF instrument equipped with ESI source. Copies of their  $^1\text{H}$  NMR and  $^{13}\text{C}$  NMR spectra are provided in the Supporting Information. Commercially available reagents were used without further purification. All solvents were dried under standard method.

## 2. General Procedure for the nitration/cyclization of 1,6-enynes with $t\text{BuONO}$ and TEMPO

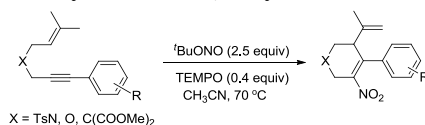

To a 10 mL dried tube were successively added 1,6-enynes **1a** (0.2 mmol, 1.0 equiv), TEMPO (0.08 mmol, 0.4 equiv), MeCN (2.0 mL) and *tert*-butyl nitrite (0.50 mmol, 2.5 equiv). The reaction mixture was stirring at 70 °C for 12 h under air. The solution was extracted with EtOAc and brine, then purified by column chromatography (silica gel, appropriate mixture of *n*-hexane/ethyl acetate) to afford **2a**.

## 3. Preparation of Starting Materials

All of 1,6-enynes **1** were synthesized according to the previous literature.<sup>1</sup>

## 4. Characterization data of 1,6-enyne **1a-1y**

Enynes **1a**, **1t**, **1u**, **1v**, **1w**, **1x**, and **1y** were synthesized according to the previous literature<sup>1</sup>, and the NMR spectroscopies were in full accordance with the data in the literature<sup>1</sup>.

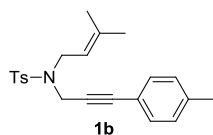

**4-methyl-N-(3-methylbut-2-en-1-yl)-N-(3-(p-tolyl)prop-2-yn-1-yl)benzenesulfonamide: 1b**  $^1\text{H}$  NMR (400 MHz,  $\text{CDCl}_3$ ):  $\delta$  7.77 (d,  $J = 8.0$  Hz, 2 H), 7.24 (d,  $J = 8.4$  Hz, 2 H), 7.03 (d,  $J = 8.0$  Hz, 2 H), 6.94 (d,  $J = 8.0$  Hz, 2 H), 5.15–5.19 (m, 1 H), 4.27 (s, 2 H), 3.87 (d,  $J = 7.6$  Hz, 2 H), 2.33 (s, 3 H), 2.32 (s, 3 H), 1.74 (s, 3 H), 1.69 (s, 3 H).  $^{13}\text{C}$  NMR (100 MHz,  $\text{CDCl}_3$ ):  $\delta$  143.2, 138.9, 138.4, 136.0, 131.3, 129.4, 128.8, 127.8, 119.2, 118.1, 85.4, 81.4, 44.1, 36.3, 25.9, 21.4, 17.9.

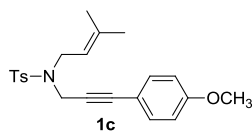

**N-(3-(4-methoxyphenyl)prop-2-yn-1-yl)-4-methyl-N-(3-methylbut-2-en-1-yl)benzenesulfonamide: 1c**  $^1\text{H}$  NMR (400 MHz,  $\text{CDCl}_3$ ):  $\delta$  7.77 (d,  $J = 8.0$  Hz, 2 H), 7.24 (d,  $J = 8.0$  Hz, 2 H), 7.00 (d,  $J = 8.4$  Hz, 2 H), 6.75 (d,  $J = 8.8$  Hz, 2 H), 5.17 (t,  $J = 7.2$  Hz, 1 H), 4.26 (s, 2 H), 3.87 (d,  $J = 7.6$  Hz, 2 H), 3.78 (s, 3 H), 2.33 (s, 3 H), 1.74 (s, 3 H), 1.69 (s, 3 H).  $^{13}\text{C}$  NMR (100 MHz,  $\text{CDCl}_3$ ):  $\delta$  159.5, 143.1, 138.8, 136.0, 132.8, 129.3, 127.7, 118.0, 114.3, 113.6, 85.2, 80.6, 55.2, 44.0, 36.3, 25.8, 21.3, 17.8.

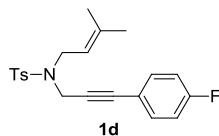

*N*-(3-(4-fluorophenyl)prop-2-yn-1-yl)-4-methyl-*N*-(3-methylbut-2-en-1-yl)benzenesulfonamide: **1d**  $^1\text{H}$  NMR (400 MHz,  $\text{CDCl}_3$ ):  $\delta$  7.77 (d,  $J = 8.0$  Hz, 2 H), 7.25 (d,  $J = 8.0$  Hz, 2 H), 7.02–7.05 (m, 2 H), 6.93 (t,  $J = 8.4$  Hz, 2 H), 5.16 (d,  $J = 6.4$  Hz, 1 H), 4.26 (s, 2 H), 3.87 (d,  $J = 7.2$  Hz, 2 H), 2.34 (s, 3 H), 1.74 (s, 3 H), 1.69 (s, 3 H).  $^{13}\text{C}$  NMR (100 MHz,  $\text{CDCl}_3$ ):  $\delta$  163.6, 161.2, 143.2, 139.0, 136.1, 133.3, 133.2, 129.4, 127.8, 118.4, 118.0, 115.5, 115.3, 84.2, 82.0, 44.1, 36.2, 25.9, 21.4, 17.9.

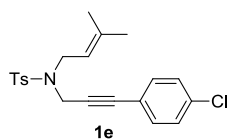

*N*-(3-(4-chlorophenyl)prop-2-yn-1-yl)-4-methyl-*N*-(3-methylbut-2-en-1-yl)benzenesulfonamide: **1e**  $^1\text{H}$  NMR (400 MHz,  $\text{CDCl}_3$ ):  $\delta$  7.76 (d,  $J = 8.4$  Hz, 2 H), 7.20–7.25 (m, 4 H), 6.97 (d,  $J = 8.8$  Hz, 2 H), 5.14–5.18 (m, 1 H), 4.26 (s, 2 H), 3.86 (d,  $J = 7.2$  Hz, 2 H), 2.34 (s, 3 H), 1.74 (s, 3 H), 1.68 (s, 3 H).  $^{13}\text{C}$  NMR (100 MHz,  $\text{CDCl}_3$ ):  $\delta$  143.5, 139.3, 136.3, 134.6, 132.9, 129.7, 128.7, 128.1, 121.0, 118.2, 84.4, 83.6, 44.4, 36.5, 26.1, 21.6, 18.1.

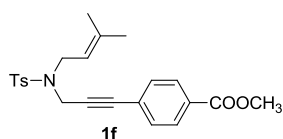

*Methyl 4*-(3-(4-methyl-*N*-(3-methylbut-2-en-1-yl)phenylsulfonamido)prop-1-yn-1-yl)benzoate: **1f**  $^1\text{H}$  NMR (400 MHz,  $\text{CDCl}_3$ ):  $\delta$  7.91 (d,  $J = 8.4$  Hz, 2 H), 7.87 (d,  $J = 8.0$  Hz, 2 H), 7.24 (d,  $J = 8.0$  Hz, 2 H), 7.10 (d,  $J = 8.4$  Hz, 2 H), 5.17 (t,  $J = 7.2$  Hz, 1 H), 4.29 (s, 2 H), 3.91 (s, 3 H), 3.88 (d,  $J = 7.2$  Hz, 2 H), 2.32 (s, 3 H), 1.74 (s, 3 H), 1.69 (s, 3 H).  $^{13}\text{C}$  NMR (100 MHz,  $\text{CDCl}_3$ ):  $\delta$  166.2, 143.3, 139.1, 135.9, 131.2, 129.6, 129.4, 129.2, 127.8, 126.8, 117.8, 85.4, 84.5, 52.1, 44.2, 36.2, 25.8, 21.3, 17.8.

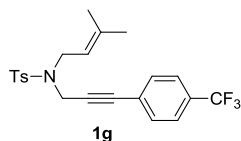

4-methyl-*N*-(3-methylbut-2-en-1-yl)-*N*-(3-(4-(trifluoromethyl)phenyl)prop-2-yn-1-yl)benzenesulfonamide: **1g**  $^1\text{H}$  NMR (400 MHz,  $\text{CDCl}_3$ ):  $\delta$  7.77 (d,  $J = 8.4$  Hz, 2 H), 7.50 (d,  $J = 8.0$  Hz, 2 H), 7.25 (d,  $J = 8.0$  Hz, 2 H), 7.15 (d,  $J = 8.0$  Hz, 2 H), 5.15–5.19 (m, 1 H), 4.29 (s, 2 H), 3.88 (d,  $J = 7.2$  Hz, 2 H), 2.33 (s, 3 H), 1.75 (s, 3 H), 1.68 (s, 3 H).  $^{13}\text{C}$  NMR (100 MHz,  $\text{CDCl}_3$ ):  $\delta$  143.4, 139.2, 136.0, 131.6, 129.9, 129.4, 127.9, 126.1, 125.1, 125.1, 125.0, 125.0, 122.4, 117.9, 85.0, 84.0, 44.3, 36.2, 25.9, 21.4, 17.9.

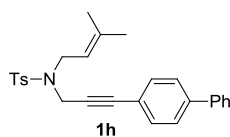

*N*-(3-([1,1'-biphenyl]-4-yl)prop-2-yn-1-yl)-4-methyl-*N*-(3-methylbut-2-en-1-yl)benzenesulfonamide: **1h**  $^1\text{H}$  NMR

(400 MHz, CDCl<sub>3</sub>):  $\delta$  7.79 (d,  $J$  = 8.4 Hz, 2 H), 7.54–7.56 (m, 2 H), 7.42–7.48 (m, 4 H), 7.34–7.38 (m, 1 H), 7.26 (d,  $J$  = 7.6 Hz, 2 H), 7.12 (d,  $J$  = 8.4 Hz, 2 H), 5.17–5.21 (m, 1 H), 4.30 (s, 2 H), 3.89 (d,  $J$  = 7.2 Hz, 2 H), 2.34 (s, 3 H), 1.76 (s, 3 H), 1.71 (s, 3 H). <sup>13</sup>C NMR (100 MHz, CDCl<sub>3</sub>):  $\delta$  143.3, 141.1, 140.2, 139.0, 136.1, 131.8, 129.4, 128.9, 127.9, 127.7, 127.0, 126.8, 121.2, 118.1, 85.2, 82.9, 44.2, 36.4, 25.9, 21.4, 17.9.

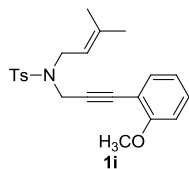

***N*-(3-(2-methoxyphenyl)prop-2-yn-1-yl)-4-methyl-N-(3-methylbut-2-en-1-yl)benzenesulfonamide: 1i** <sup>1</sup>H NMR (400 MHz, CDCl<sub>3</sub>):  $\delta$  7.78 (d,  $J$  = 8.4 Hz, 2 H), 7.24–7.26 (m, 1 H), 7.18–7.23 (m, 2 H), 6.90–6.93 (m, 1 H), 6.79–6.83 (m, 2 H), 5.16–5.21 (m, 1 H), 4.33 (s, 2 H), 3.89 (d,  $J$  = 7.6 Hz, 2 H), 3.79 (s, 3 H), 2.28 (s, 3 H), 1.73 (s, 3 H), 1.70 (s, 3 H). <sup>13</sup>C NMR (100 MHz, CDCl<sub>3</sub>):  $\delta$  160.0, 143.1, 138.9, 136.1, 133.4, 129.7, 129.3, 127.8, 120.1, 118.2, 111.6, 110.4, 86.3, 81.9, 55.5, 44.1, 36.6, 25.9, 21.4, 17.8.

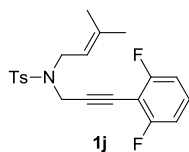

***N*-(3-(2,6-difluorophenyl)prop-2-yn-1-yl)-4-methyl-N-(3-methylbut-2-en-1-yl)benzenesulfonamide: 1j** <sup>1</sup>H NMR (400 MHz, CDCl<sub>3</sub>):  $\delta$  7.77 (d,  $J$  = 8.0 Hz, 2 H), 7.29 (d,  $J$  = 8.0 Hz, 2 H), 6.72–6.78 (m, 1 H), 6.50 (dd,  $J$  = 2.0 Hz, 7.6 Hz, 2 H), 5.15–5.18 (m, 1 H), 4.26 (s, 2 H), 3.87 (d,  $J$  = 7.2 Hz, 2 H), 2.38 (s, 3 H), 1.75 (s, 3 H), 1.68 (s, 3 H). <sup>13</sup>C NMR (100 MHz, CDCl<sub>3</sub>):  $\delta$  164.0, 163.9, 161.5, 161.4, 143.8, 140.0, 136.2, 129.8, 128.1, 125.2, 125.1, 125.0, 118.0, 114.8, 114.7, 114.6, 114.5, 105.0, 104.8, 104.5, 84.7, 83.4, 83.4, 83.4, 44.5, 36.3, 26.1, 21.5, 18.1.

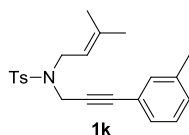

***4*-methyl-N-(3-methylbut-2-en-1-yl)-N-(3-(*m*-tolyl)prop-2-yn-1-yl)benzenesulfonamide: 1k** <sup>1</sup>H NMR (400 MHz, CDCl<sub>3</sub>):  $\delta$  7.78 (d,  $J$  = 8.4 Hz, 2 H), 7.25 (d,  $J$  = 6.4 Hz, 2 H), 7.07–7.14 (m, 2 H), 6.85–6.87 (m, 2 H), 5.15–5.20 (m, 1 H), 4.27 (s, 2 H), 3.87 (d,  $J$  = 7.2 Hz, 2 H), 2.34 (s, 3 H), 2.23 (s, 3 H), 1.74 (s, 3 H), 1.69 (s, 3 H). <sup>13</sup>C NMR (100 MHz, CDCl<sub>3</sub>):  $\delta$  143.2, 139.0, 137.7, 136.1, 132.0, 129.4, 129.2, 128.5, 128.0, 127.9, 122.1, 118.1, 85.5, 81.8, 44.1, 36.3, 25.9, 21.4, 21.2, 17.9.

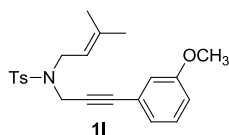

***N*-(3-(3-methoxyphenyl)prop-2-yn-1-yl)-4-methyl-N-(3-methylbut-2-en-1-yl)benzenesulfonamide: 1l** <sup>1</sup>H NMR (400 MHz, CDCl<sub>3</sub>):  $\delta$  7.77 (d,  $J$  = 8.4 Hz, 2 H), 7.25 (d,  $J$  = 8.0 Hz, 2 H), 7.14 (t,  $J$  = 8.0 Hz, 1 H), 6.81–6.84 (m, 1 H), 6.64 (d,  $J$  = 7.6 Hz, 1 H), 6.59 (dd,  $J$  = 1.2 Hz, 2.4 Hz, 1 H), 5.15–5.19 (m, 1 H), 4.27 (s, 2 H), 3.87 (d,  $J$  = 7.2 Hz, 2 H), 3.77 (s, 3 H), 2.34 (s, 3 H), 1.74 (s, 3 H), 1.69 (s, 3 H). <sup>13</sup>C NMR (100 MHz, CDCl<sub>3</sub>):  $\delta$  159.1, 143.3,

139.0, 136.0, 129.4, 129.1, 127.8, 123.9, 123.3, 118.0, 116.9, 114.2, 85.2, 82.1, 55.2, 44.1, 36.3, 25.9, 21.4, 17.9.

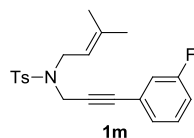

***N*-(3-(3-fluorophenyl)prop-2-yn-1-yl)-4-methyl-*N*-(3-methylbut-2-en-1-yl)benzenesulfonamide: 1m**  $^1\text{H}$  NMR (400 MHz,  $\text{CDCl}_3$ ):  $\delta$  7.77 (d,  $J = 8.0$  Hz, 2 H), 7.26 (d,  $J = 8.0$  Hz, 2 H), 7.17–7.23 (m, 1 H), 6.95–7.00 (m, 1 H), 6.85 (dd,  $J = 1.2$  Hz, 7.6 Hz, 1 H), 6.64–6.67 (m, 1 H), 5.15–5.19 (m, 1 H), 4.27 (s, 2 H), 3.87 (d,  $J = 7.2$  Hz, 2 H), 2.35 (s, 3 H), 1.75 (s, 3 H), 1.69 (s, 3 H).  $^{13}\text{C}$  NMR (100 MHz,  $\text{CDCl}_3$ ):  $\delta$  163.6, 161.1, 143.7, 139.4, 136.2, 130.0, 129.9, 129.7, 128.1, 127.5, 127.4, 124.4, 124.3, 118.6, 118.4, 118.2, 116.0, 115.8, 84.4, 84.3, 83.5, 44.4, 36.4, 26.1, 21.6, 18.1.

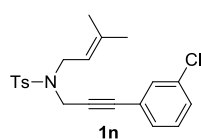

***N*-(3-(3-chlorophenyl)prop-2-yn-1-yl)-4-methyl-*N*-(3-methylbut-2-en-1-yl)benzenesulfonamide: 1n**  $^1\text{H}$  NMR (400 MHz,  $\text{CDCl}_3$ ):  $\delta$  7.77 (d,  $J = 8.0$  Hz, 2 H), 7.24–7.28 (m, 3 H), 7.16 (t,  $J = 8.0$  Hz, 1 H), 6.92–6.98 (m, 2 H), 5.15–5.19 (m, 1 H), 4.27 (s, 2 H), 3.87 (d,  $J = 7.6$  Hz, 2 H), 2.37 (s, 3 H), 1.75 (s, 3 H), 1.68 (s, 3 H).  $^{13}\text{C}$  NMR (100 MHz,  $\text{CDCl}_3$ ):  $\delta$  143.7, 139.4, 136.3, 134.1, 131.2, 129.7, 129.6, 128.8, 128.1, 124.2, 118.2, 84.2, 83.8, 44.5, 36.4, 26.1, 21.7, 18.1.

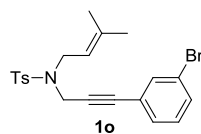

***N*-(3-(3-bromophenyl)prop-2-yn-1-yl)-4-methyl-*N*-(3-methylbut-2-en-1-yl)benzenesulfonamide: 1o**  $^1\text{H}$  NMR (400 MHz,  $\text{CDCl}_3$ ):  $\delta$  7.77 (d,  $J = 8.0$  Hz, 2 H), 7.40 (d,  $J = 8.0$  Hz, 1 H), 7.27 (d,  $J = 8.0$  Hz, 2 H), 7.10 (m, 2 H), 7.01 (d,  $J = 7.6$  Hz, 1 H), 5.15–5.19 (m, 1 H), 4.27 (s, 2 H), 3.87 (d,  $J = 7.2$  Hz, 2 H), 2.38 (s, 3 H), 1.75 (s, 3 H), 1.68 (s, 3 H).  $^{13}\text{C}$  NMR (100 MHz,  $\text{CDCl}_3$ ):  $\delta$  143.7, 139.4, 136.2, 134.4, 131.7, 130.1, 129.8, 129.7, 128.1, 124.5, 122.1, 118.2, 84.0, 83.9, 44.5, 36.4, 26.1, 21.7, 18.1.

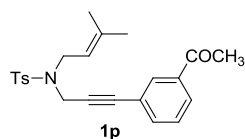

***N*-(3-(3-acetylphenyl)prop-2-yn-1-yl)-4-methyl-*N*-(3-methylbut-2-en-1-yl)benzenesulfonamide: 1p**  $^1\text{H}$  NMR (400 MHz,  $\text{CDCl}_3$ ):  $\delta$  7.85 (d,  $J = 7.6$  Hz, 1 H), 7.78 (d,  $J = 8.0$  Hz, 2 H), 7.68 (s, 1 H), 7.36 (t,  $J = 8.0$  Hz, 1 H), 7.23–7.28 (m, 3 H), 5.16–5.19 (m, 1 H), 4.30 (s, 2 H), 3.88 (d,  $J = 7.2$  Hz, 2 H), 2.58 (s, 3 H), 2.32 (s, 3 H), 1.75 (s, 3 H), 1.70 (s, 3 H).  $^{13}\text{C}$  NMR (100 MHz,  $\text{CDCl}_3$ ):  $\delta$  197.3, 143.7, 139.4, 137.2, 136.1, 135.8, 131.3, 129.7, 128.7, 128.3, 128.0, 123.2, 118.1, 84.5, 83.6, 44.4, 36.4, 26.8, 26.1, 21.6, 18.1.

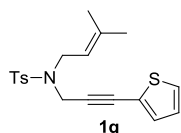

**4-methyl-N-(3-methylbut-2-en-1-yl)-N-(3-(thiophen-2-yl)prop-2-yn-1-yl)benzenesulfonamide: 1q**  $^1\text{H}$  NMR (400 MHz,  $\text{CDCl}_3$ ):  $\delta$  7.76 (d,  $J = 8.4$  Hz, 2 H), 7.27 (d,  $J = 8.0$  Hz, 2 H), 7.19 (dd,  $J = 2.0$  Hz, 4.4 Hz, 1 H), 6.88–6.90 (m, 2 H), 5.13–5.18 (m, 1 H), 4.28 (s, 2 H), 3.85 (d,  $J = 7.2$  Hz, 2 H), 2.34 (s, 3 H), 1.74 (s, 3 H), 1.69 (s, 3 H).  $^{13}\text{C}$  NMR (100 MHz,  $\text{CDCl}_3$ ):  $\delta$  143.7, 139.4, 136.1, 132.3, 129.8, 128.0, 127.4, 127.0, 122.5, 118.2, 86.5, 78.9, 44.5, 36.7, 26.1, 21.7, 18.1.

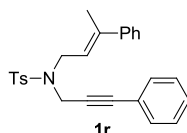

**(E)-4-methyl-N-(3-phenylbut-2-en-1-yl)-N-(3-phenylprop-2-yn-1-yl)benzenesulfonamide: 1r**  $^1\text{H}$  NMR (400 MHz,  $\text{CDCl}_3$ ):  $\delta$  7.81 (d,  $J = 8.0$  Hz, 2 H), 7.21–7.36 (m, 10 H), 7.06–7.08 (m, 2 H), 5.75–5.79 (m, 1 H), 4.34 (s, 2 H), 4.11 (d,  $J = 7.2$  Hz, 2 H), 2.34 (s, 3 H), 2.11 (s, 3 H).  $^{13}\text{C}$  NMR (100 MHz,  $\text{CDCl}_3$ ):  $\delta$  143.7, 142.8, 141.1, 136.3, 131.7, 129.8, 128.6, 128.5, 128.4, 128.1, 127.7, 126.0, 122.5, 121.3, 85.9, 82.4, 45.1, 37.2, 21.7, 16.3.

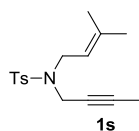

**N-(but-2-yn-1-yl)-4-methyl-N-(3-methylbut-2-en-1-yl)benzenesulfonamide: 1s**  $^1\text{H}$  NMR (400 MHz,  $\text{CDCl}_3$ ):  $\delta$  7.74 (d,  $J = 8.4$  Hz, 2 H), 7.29 (d,  $J = 8.0$  Hz, 2 H), 5.08–5.12 (m, 1 H), 3.99 (d,  $J = 2.4$  Hz, 2 H), 3.77 (d,  $J = 7.2$  Hz, 2 H), 2.43 (s, 3 H), 1.72 (s, 3 H), 1.66 (s, 3 H), 1.53 (s, 3 H).  $^{13}\text{C}$  NMR (100 MHz,  $\text{CDCl}_3$ ):  $\delta$  143.3, 138.9, 136.5, 129.4, 128.2, 118.4, 81.4, 72.3, 44.1, 36.2, 26.1, 21.7, 18.0, 3.4.

## 5. Characterization data of Products 2a-2aa

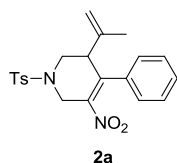

**5-nitro-4-phenyl-3-(prop-1-en-2-yl)-1-tosyl-1,2,3,6-tetrahydropyridine: 2a**  $^1\text{H}$  NMR (400 MHz,  $\text{CDCl}_3$ ):  $\delta$  7.73 (d,  $J = 8.0$  Hz, 2 H), 7.38 (d,  $J = 8.0$  Hz, 2 H), 7.30–7.32 (m, 3 H), 7.02–7.04 (m, 2 H), 4.92 (s, 1 H), 4.77 (s, 1 H), 4.54 (d,  $J = 16.0$  Hz, 1 H), 3.80 (dd,  $J = 2.0$  Hz, 16.4 Hz, 1 H), 3.62–3.66 (m, 1 H), 3.33 (s, 1 H), 3.05 (dd,  $J = 4.4$  Hz, 12 Hz, 1 H), 2.46 (s, 3 H), 1.71 (s, 3 H).  $^{13}\text{C}$  NMR (100 MHz,  $\text{CDCl}_3$ ):  $\delta$  144.4, 142.7, 141.3, 141.2, 135.8, 132.7, 130.0, 128.6, 128.4, 127.7, 126.7, 116.9, 48.8, 46.8, 44.8, 21.6. HRMS (ESI,  $m/z$ ): calcd for  $\text{C}_{21}\text{H}_{22}\text{N}_2\text{O}_4\text{S}$ :  $[\text{M}+\text{Na}]^+ = 421.1192$ , found: 421.1185. IR (neat,  $\text{cm}^{-1}$ ): 3350, 3063, 2923, 2374, 1802, 1597, 1526, 1459, 1345, 1258, 1167, 1021, 947, 857, 813, 737, 700, 658, 549.

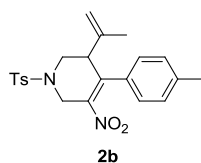

**5-nitro-3-(prop-1-en-2-yl)-4-(p-tolyl)-1-tosyl-1,2,3,6-tetrahydropyridine: 2b** Yellow solid; mp: 112–114  $^{\circ}\text{C}$ .  $^1\text{H}$

NMR (400 MHz, CDCl<sub>3</sub>):  $\delta$  7.72 (d,  $J$  = 8.0 Hz, 2 H), 7.37 (d,  $J$  = 8.0 Hz, 2 H), 7.10 (d,  $J$  = 8.0 Hz, 2 H), 6.92 (d,  $J$  = 8.0 Hz, 2 H), 4.91 (t,  $J$  = 1.2 Hz, 1 H), 4.77 (s, 1 H), 4.53 (d,  $J$  = 16.0 Hz, 1 H), 3.75–3.80 (m, 1 H), 3.64 (dd,  $J$  = 3.6 Hz, 12 Hz, 1 H), 3.32 (s, 1 H), 3.02–3.06 (m, 1 H), 2.45 (s, 3 H), 2.32 (s, 3 H), 1.71 (s, 3 H). <sup>13</sup>C NMR (100 MHz, CDCl<sub>3</sub>):  $\delta$  144.3, 142.6, 141.4, 141.1, 138.7, 132.9, 132.7, 130.0, 129.2, 127.7, 126.6, 116.7, 48.7, 46.8, 44.9, 21.5, 21.2. HRMS (ESI, m/z): calcd for C<sub>22</sub>H<sub>24</sub>N<sub>2</sub>O<sub>4</sub>S: [M+Na]<sup>+</sup> = 435.1349, found: 435.1360. IR (neat, cm<sup>-1</sup>): 3345, 3030, 2924, 2857, 2737, 2587, 1918, 1776, 1722, 1642, 1598, 1526, 1454, 1403, 1346, 1266, 1229, 1167, 1113, 1021, 979, 947, 904, 857, 819, 737, 659, 622, 560, 551, 518, 482.

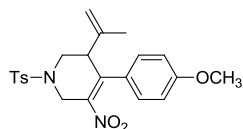

**2c**

**4-(4-methoxyphenyl)-5-nitro-3-(prop-1-en-2-yl)-1-tosyl-1,2,3,6-tetrahydropyridine: 2c** <sup>1</sup>H NMR (400 MHz, CDCl<sub>3</sub>):  $\delta$  7.72 (d,  $J$  = 8.0 Hz, 2 H), 7.37 (d,  $J$  = 8.0 Hz, 2 H), 6.98 (d,  $J$  = 8.8 Hz, 2 H), 6.82 (d,  $J$  = 8.4 Hz, 2 H), 4.92 (s, 1 H), 4.77 (s, 1 H), 4.53 (d,  $J$  = 15.2 Hz, 1 H), 3.74–3.78 (m, 4 H), 3.62–3.66 (m, 1 H), 3.32 (s, 1 H), 3.01–3.05 (m, 1 H), 2.46 (s, 3 H), 1.71 (s, 3 H). <sup>13</sup>C NMR (100 MHz, CDCl<sub>3</sub>):  $\delta$  160.2, 144.6, 142.7, 141.8, 140.9, 133.1, 130.3, 128.5, 128.0, 128.0, 117.0, 114.3, 55.4, 48.9, 47.2, 45.3, 21.8, 21.8. HRMS (ESI, m/z): calcd for C<sub>22</sub>H<sub>24</sub>N<sub>2</sub>O<sub>5</sub>S: [M+Na]<sup>+</sup> = 451.1298, found: 451.1309. IR (neat, cm<sup>-1</sup>): 3393, 3061, 2926, 2854, 2374, 2052, 1921, 1778, 1720, 1650, 1603, 1523, 1460, 1344, 1295, 1256, 1167, 1114, 1031, 978, 947, 906, 812, 736, 660, 551.

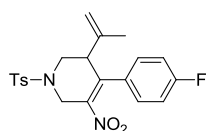

**2d**

**4-(4-fluorophenyl)-5-nitro-3-(prop-1-en-2-yl)-1-tosyl-1,2,3,6-tetrahydropyridine: 2d** Yellow solid; mp: 156–158 °C. <sup>1</sup>H NMR (400 MHz, CDCl<sub>3</sub>):  $\delta$  7.72 (d,  $J$  = 8.4 Hz, 2 H), 7.38 (d,  $J$  = 8.4 Hz, 2 H), 6.99–7.02 (m, 4 H), 4.93 (s, 1 H), 4.76 (s, 1 H), 4.51 (d,  $J$  = 16.4 Hz, 1 H), 3.81 (dd,  $J$  = 2.0 Hz, 16.4 Hz, 1 H), 3.61–3.65 (m, 1 H), 3.28 (s, 1 H), 3.03–3.08 (m, 1 H), 2.46 (s, 3 H), 1.71 (s, 3 H). <sup>13</sup>C NMR (100 MHz, CDCl<sub>3</sub>):  $\delta$  164.2, 161.7, 144.7, 143.4, 141.4, 140.5, 133.0, 131.9, 131.9, 130.3, 129.0, 128.9, 128.0, 117.3, 116.0, 115.8, 49.2, 47.0, 45.1, 21.8, 21.8. HRMS (ESI, m/z): calcd for C<sub>21</sub>H<sub>21</sub>FN<sub>2</sub>O<sub>4</sub>S: [M+Na]<sup>+</sup> = 439.1098, found: 439.1111. IR (neat, cm<sup>-1</sup>): 3333, 3073, 2924, 2853, 2511, 2375, 1973, 1923, 1899, 1781, 1721, 1640, 1597, 1526, 1453, 1406, 1379, 1345, 1306, 1262, 1226, 1116, 1117, 1041, 979, 948, 889, 856, 834, 814, 741, 659, 617, 551, 548, 527, 491.

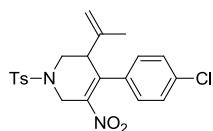

**2e**

**4-(4-chlorophenyl)-5-nitro-3-(prop-1-en-2-yl)-1-tosyl-1,2,3,6-tetrahydropyridine: 2e** Yellow solid; mp: 164–166 °C. <sup>1</sup>H NMR (400 MHz, CDCl<sub>3</sub>):  $\delta$  7.72 (d,  $J$  = 8.4 Hz, 2 H), 7.38 (d,  $J$  = 8.0 Hz, 2 H), 7.26–7.29 (m, 2 H), 6.97 (d,  $J$  = 8.8 Hz, 2 H), 4.93 (s, 1 H), 4.75 (s, 1 H), 4.51 (dd,  $J$  = 1.2 Hz, 16.4 Hz, 1 H), 3.81 (dd,  $J$  = 2.4 Hz, 16.4 Hz, 1 H), 3.62 (dd,  $J$  = 3.6 Hz, 12.4 Hz, 1 H), 3.27 (s, 1 H), 3.04–3.08 (m, 1 H), 2.46 (s, 3 H), 1.70 (s, 3 H). <sup>13</sup>C NMR (100 MHz, CDCl<sub>3</sub>):  $\delta$  144.5, 143.1, 141.0, 140.3, 134.7, 134.2, 132.8, 130.0, 128.8, 128.2, 127.7, 117.1, 48.9, 46.8, 44.8, 21.6, 21.5. HRMS (ESI, m/z): calcd for C<sub>21</sub>H<sub>21</sub>ClN<sub>2</sub>O<sub>4</sub>S: [M+Na]<sup>+</sup> = 455.0803, found: 455.0817. IR (neat,

cm<sup>-1</sup>): 3372, 3066, 2924, 2854, 2739, 1914, 1736, 1644, 1596, 1527, 1491, 1457, 1344, 1266, 1228, 1167, 1091, 1017, 947, 858, 829, 736, 658, 605, 550, 515.

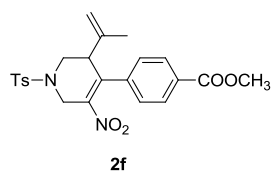

**4-(5-nitro-3-(prop-1-en-2-yl)-1-tosyl-1,2,3,6-tetrahydropyridin-4-yl) benzoate : 2f** Yellow solid; mp: 168–170 °C. <sup>1</sup>H NMR (400 MHz, CDCl<sub>3</sub>): δ 7.98 (d, *J* = 8.4 Hz, 2 H), 7.73 (d, *J* = 8.0 Hz, 2 H), 7.39 (d, *J* = 8.4 Hz, 2 H), 7.09 (d, *J* = 8.4 Hz, 2 H), 4.92 (s, 1 H), 4.75 (s, 1 H), 4.51–4.55 (m, 1 H), 3.90 (s, 3 H), 3.84 (dd, *J* = 2.0 Hz, 16.4 Hz, 1 H), 3.62 (dd, *J* = 3.6 Hz, 12 Hz, 1 H), 3.31 (s, 1 H), 3.07–3.11 (m, 1 H), 2.47 (s, 3 H), 1.70 (s, 3 H). <sup>13</sup>C NMR (100 MHz, CDCl<sub>3</sub>): δ 166.6, 144.8, 143.4, 141.3, 141.1, 140.9, 133.1, 130.5, 130.3, 130.0, 128.0, 127.1, 117.5, 52.5, 49.2, 47.0, 45.0, 21.8, 21.8. HRMS (ESI, *m/z*): calcd for C<sub>23</sub>H<sub>24</sub>N<sub>2</sub>O<sub>6</sub>S: [M+Na]<sup>+</sup> = 479.1247, found: 479.1261. IR (neat, cm<sup>-1</sup>): 3422, 3062, 2925, 2854, 2372, 1929, 1809, 1722, 1644, 1608, 1528, 1437, 1405, 1344, 1279, 1167, 1111, 1021, 947, 861, 817, 775, 737, 708, 658, 550, 489.

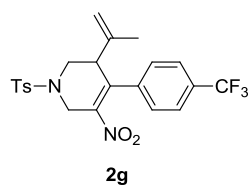

**5-nitro-3-(prop-1-en-2-yl)-1-tosyl-4-(4-(trifluoromethyl)phenyl)-1,2,3,6-tetrahydropyridine: 2g** <sup>1</sup>H NMR (400 MHz, CDCl<sub>3</sub>): δ 7.73 (d, *J* = 8.4 Hz, 2 H), 7.58 (d, *J* = 8.4 Hz, 2 H), 7.39 (d, *J* = 8.0 Hz, 2 H), 7.15 (d, *J* = 8.0 Hz, 2 H), 4.95 (s, 1 H), 4.77 (s, 1 H), 4.55 (d, *J* = 16.4 Hz, 1 H), 3.84 (dd, *J* = 2.0 Hz, 16.4 Hz, 1 H), 3.62–3.66 (m, 1 H), 3.29 (s, 1 H), 3.05–3.10 (m, 1 H), 2.47 (s, 3 H), 1.72 (s, 3 H). <sup>13</sup>C NMR (100 MHz, CDCl<sub>3</sub>): δ 144.6, 143.4, 140.7, 140.5, 139.8, 132.7, 130.1, 127.8, 127.3, 125.5, 125.5, 117.4, 49.0, 46.7, 44.7, 21.6, 21.6. HRMS (ESI, *m/z*): calcd for C<sub>22</sub>H<sub>21</sub>F<sub>3</sub>N<sub>2</sub>O<sub>4</sub>S: [M+Na]<sup>+</sup> = 489.1066, found: 489.1078. IR (neat, cm<sup>-1</sup>): 3404, 3060, 2926, 2856, 2307, 1923, 1722, 1642, 1617, 1598, 1529, 1458, 1407, 1325, 1266, 1229, 1167, 1128, 1069, 1019, 947, 908, 842, 816, 739, 660, 578, 550, 515.

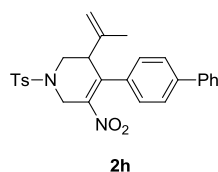

**4-([1,1'-biphenyl]-4-yl)-5-nitro-3-(prop-1-en-2-yl)-1-tosyl-1,2,3,6-tetrahydropyridine: 2h** Yellow solid; mp: 92–94 °C. <sup>1</sup>H NMR (400 MHz, CDCl<sub>3</sub>): δ 7.73 (d, *J* = 8.4 Hz, 2 H), 7.52–7.57 (m, 4 H), 7.31–7.43 (m, 5 H), 7.11 (d, *J* = 8.4 Hz, 2 H), 4.94 (s, 1 H), 4.81 (s, 1 H), 4.54–4.59 (m, 1 H), 3.79–3.83 (m, 1 H), 3.67 (dd, *J* = 3.2 Hz, 12.4 Hz, 1 H), 3.36 (s, 1 H), 3.06 (dd, *J* = 4.4 Hz, 12 Hz, 1 H), 2.45 (s, 3 H), 1.74 (s, 3 H). <sup>13</sup>C NMR (100 MHz, CDCl<sub>3</sub>): δ 144.7, 143.1, 141.7, 141.5, 141.2, 140.3, 134.9, 133.0, 130.3, 129.0, 128.0, 127.5, 127.3, 127.2, 117.2, 49.0, 47.1, 45.1, 21.9, 21.8. HRMS (ESI, *m/z*): calcd for C<sub>27</sub>H<sub>25</sub>N<sub>2</sub>O<sub>4</sub>S: [M+Na]<sup>+</sup> = 497.1505, found: 497.1519. IR (neat, cm<sup>-1</sup>): 3306, 3058, 2924, 2856, 2587, 2368, 1921, 1807, 1720, 1644, 1599, 1527, 1488, 1457, 1345, 1266, 1229, 1168, 1113, 1019, 1009, 979, 947, 906, 840, 816, 737, 701, 661, 549, 506.



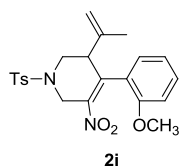

**4-(2-methoxyphenyl)-5-nitro-3-(prop-1-en-2-yl)-1-tosyl-1,2,3,6-tetrahydropyridine: 2i** Yellow solid; mp: 166–168 °C. <sup>1</sup>H NMR (400 MHz, CDCl<sub>3</sub>): δ 7.73 (d, *J* = 8.4 Hz, 2 H), 7.37 (d, *J* = 8.0 Hz, 2 H), 7.25–7.30 (m, 1 H), 6.92–6.94 (m, 2 H), 6.82–6.90 (m, 1 H), 4.83 (s, 1 H), 4.75 (s, 1 H), 4.58 (d, *J* = 16.0 Hz, 1 H), 3.78 (dd, *J* = 2.0 Hz, 16.4 Hz, 1 H), 3.70 (s, 3 H), 3.56–3.59 (m, 1 H), 3.45–3.46 (m, 1 H), 3.08 (d, *J* = 10.0 Hz, 1 H), 2.46 (s, 3 H), 1.68 (s, 3 H). <sup>13</sup>C NMR (100 MHz, CDCl<sub>3</sub>): δ 156.2, 144.7, 143.5, 141.9, 133.1, 130.2, 130.1, 128.0, 125.3, 120.7, 116.5, 111.1, 55.5, 47.0, 47.0, 44.9, 21.8, 21.7. HRMS (ESI, *m/z*): calcd for C<sub>22</sub>H<sub>24</sub>N<sub>2</sub>O<sub>5</sub>S: [M+Na]<sup>+</sup> = 451.1298, found: 451.1310. IR (neat, cm<sup>-1</sup>): 3392, 3066, 2925, 2851, 2375, 1923, 1737, 1598, 1526, 1492, 1344, 1290, 1254, 1167, 1117, 1023, 980, 947, 906, 859, 813, 752, 737, 704, 658, 550.

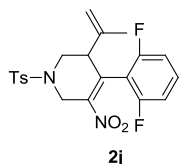

**4-(2,6-difluorophenyl)-5-nitro-3-(prop-1-en-2-yl)-1-tosyl-1,2,3,6-tetrahydropyridine: 2j** Yellow solid; mp: 170–172 °C. <sup>1</sup>H NMR (400 MHz, CDCl<sub>3</sub>): δ 7.72 (d, *J* = 8.0 Hz, 2 H), 7.39 (d, *J* = 8.0 Hz, 2 H), 6.74–6.79 (m, 1 H), 6.53 (d, *J* = 6.0 Hz, 2 H), 4.97 (s, 1 H), 4.76 (s, 1 H), 4.51 (d, *J* = 16.8 Hz, 1 H), 3.82–3.87 (m, 1 H), 3.62 (dd, *J* = 3.6 Hz, 12.4 Hz, 1 H), 3.21 (s, 1 H), 3.08 (dd, *J* = 4.8 Hz, 12.4 Hz, 1 H), 2.47 (s, 3 H), 1.73 (s, 3 H). <sup>13</sup>C NMR (100 MHz, CDCl<sub>3</sub>): δ 164.4, 164.2, 161.9, 161.7, 144.8, 143.9, 140.9, 139.5, 139.2, 139.1, 133.2, 130.4, 128.0, 117.6, 110.6, 110.5, 110.4, 110.3, 104.7, 104.4, 104.2, 49.0, 46.9, 44.9, 21.8, 21.8. HRMS (ESI, *m/z*): calcd for C<sub>21</sub>H<sub>20</sub>F<sub>2</sub>N<sub>2</sub>O<sub>4</sub>S: [M+Na]<sup>+</sup> = 457.1004, found: 457.1015. IR (neat, cm<sup>-1</sup>): 3302, 3058, 2927, 2853, 2686, 2306, 2110, 1919, 1802, 1722, 1621, 1591, 1529, 1494, 1432, 1401, 1346, 1320, 1265, 1228, 1165, 1118, 1090, 1036, 987, 938, 899, 862, 837, 812, 738, 705, 658, 587, 547, 511, 482.

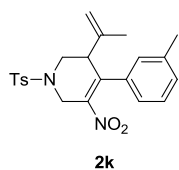

**5-nitro-3-(prop-1-en-2-yl)-4-(*m*-tolyl)-1-tosyl-1,2,3,6-tetrahydropyridine: 2k** <sup>1</sup>H NMR (400 MHz, CDCl<sub>3</sub>): δ 7.72 (d, *J* = 8.0 Hz, 2 H), 7.38 (d, *J* = 8.0 Hz, 2 H), 7.17–7.21 (m, 1 H), 7.11 (d, *J* = 7.6 Hz, 1 H), 6.83 (d, *J* = 7.6 Hz, 2 H), 4.92 (s, 1 H), 4.77 (s, 1 H), 4.54 (d, *J* = 16.4 Hz, 1 H), 3.76–3.80 (m, 1 H), 3.63–3.67 (m, 1 H), 3.31 (s, 1 H), 3.01–3.05 (m, 1 H), 2.46 (s, 3 H), 2.30 (s, 3 H), 1.72 (s, 3 H). <sup>13</sup>C NMR (100 MHz, CDCl<sub>3</sub>): δ 144.6, 142.9, 141.6, 141.5, 138.4, 136.0, 133.1, 130.3, 129.7, 128.6, 128.0, 127.5, 124.1, 117.0, 49.0, 47.1, 45.1, 21.8, 21.8, 21.6. HRMS (ESI, *m/z*): calcd for C<sub>22</sub>H<sub>24</sub>N<sub>2</sub>O<sub>4</sub>S: [M+Na]<sup>+</sup> = 435.1349, found: 435.1358. IR (neat, cm<sup>-1</sup>): 3343, 3048, 2923, 2859, 2373, 1926, 1711, 1645, 1599, 1526, 1492, 1457, 1345, 1266, 1229, 1167, 1115, 1091, 1020, 954, 904, 857, 836, 791, 737, 705, 658, 575, 550, 442.

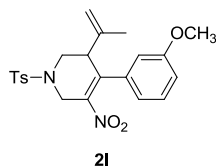

**4-(3-methoxyphenyl)-5-nitro-3-(prop-1-en-2-yl)-1-tosyl-1,2,3,6-tetrahydropyridine: 2l** Yellow solid; mp: 140–142 °C. <sup>1</sup>H NMR (400 MHz, CDCl<sub>3</sub>): δ 7.72 (d, *J* = 8.0 Hz, 2 H), 7.37 (d, *J* = 8.4 Hz, 2 H), 7.21 (t, *J* = 8.0 Hz, 1 H), 6.82–6.85 (m, 1 H), 6.56–6.61 (m, 1 H), 6.56 (s, 1 H), 4.93 (s, 1 H), 4.78 (s, 1 H), 4.52 (d, *J* = 16.0 Hz, 1 H), 3.78 (dd, *J* = 2.0 Hz, 16.4 Hz, 1 H), 3.75 (s, 3 H), 3.63 (dd, *J* = 3.2 Hz, 12 Hz, 1 H), 3.30 (s, 1 H), 3.04 (dd, *J* = 4.4 Hz, 12 Hz, 1 H), 2.50 (s, 3 H), 1.72 (s, 3 H). <sup>13</sup>C NMR (100 MHz, CDCl<sub>3</sub>): δ 160.0, 144.6, 143.0, 141.5, 141.0, 137.3, 133.1, 130.2, 129.8, 127.9, 119.3, 117.0, 114.0, 113.1, 55.4, 48.9, 47.1, 45.0, 21.8, 21.8. HRMS (ESI, *m/z*): calcd for C<sub>22</sub>H<sub>24</sub>FN<sub>2</sub>O<sub>5</sub>S: [M+Na]<sup>+</sup> = 451.1298, found: 451.1312. IR (neat, cm<sup>-1</sup>): 3305, 3059, 2926, 2856, 2740, 2585, 2307, 1924, 1721, 1646, 1599, 1580, 1527, 1489, 1459, 1431, 1378, 1345, 1290, 1267, 1209, 1168, 1114, 1019, 1048, 1019, 954, 905, 857, 835, 787, 737, 704, 659, 549, 463.

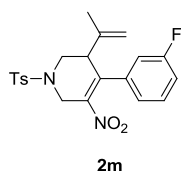

**4-(3-fluorophenyl)-5-nitro-3-(prop-1-en-2-yl)-1-tosyl-1,2,3,6-tetrahydropyridine: 2m** Yellow solid, mp: 140–142 °C. <sup>1</sup>H NMR (400 MHz, CDCl<sub>3</sub>): δ 7.72 (d, *J* = 8.0 Hz, 2 H), 7.38 (d, *J* = 8.0 Hz, 2 H), 7.24–7.30 (m, 1 H), 7.00 (dt, *J* = 2.0 Hz, 8.4 Hz, 1 H), 6.80 (d, *J* = 8.0 Hz, 1 H), 6.71–6.74 (m, 2 H), 4.94 (s, 1 H), 4.77 (s, 1 H), 4.50–4.54 (m, 1 H), 3.81–3.85 (m, 1 H), 3.63 (dd, *J* = 3.6 Hz, 12 Hz, 1 H), 3.26 (s, 1 H), 3.05–3.09 (m, 1 H), 2.46 (s, 3 H), 1.72 (s, 3 H). <sup>13</sup>C NMR (100 MHz, CDCl<sub>3</sub>): δ 163.9, 161.5, 144.8, 143.5, 140.3, 138.2, 138.1, 133.1, 130.5, 130.4, 130.3, 128.0, 122.9, 122.9, 117.4, 116.0, 115.8, 114.4, 114.2, 49.0, 47.0, 45.0, 21.8, 21.8. HRMS (ESI, *m/z*): calcd for C<sub>21</sub>H<sub>21</sub>FN<sub>2</sub>O<sub>4</sub>S: [M+Na]<sup>+</sup> = 439.1098, found: 439.1109. IR (neat, cm<sup>-1</sup>): 3338, 3071, 2923, 2856, 2370, 1922, 1801, 1721, 1641, 1583, 1527, 1485, 1452, 1380, 1344, 1264, 1229, 1164, 1114, 1039, 956, 897, 874, 846, 811, 787, 744, 703, 656, 637, 573, 545, 486.

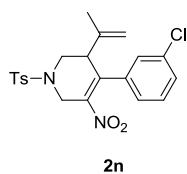

**4-(3-chlorophenyl)-5-nitro-3-(prop-1-en-2-yl)-1-tosyl-1,2,3,6-tetrahydropyridine: 2n** Yellow solid, mp: 116–118 °C. <sup>1</sup>H NMR (400 MHz, CDCl<sub>3</sub>): δ 7.72 (d, *J* = 8.0 Hz, 2 H), 7.38 (d, *J* = 8.0 Hz, 2 H), 7.22–7.30 (m, 2 H), 6.98 (s, 1 H), 6.91 (d, *J* = 7.6 Hz, 1 H), 4.95 (s, 1 H), 4.76 (s, 1 H), 4.52 (d, *J* = 16.4 Hz, 1 H), 3.81–3.86 (m, 1 H), 3.61–3.65 (m, 1 H), 3.25 (s, 1 H), 3.07 (dd, *J* = 4.4 Hz, 12.4 Hz), 2.47 (s, 3 H), 1.71 (s, 3 H). <sup>13</sup>C NMR (100 MHz, CDCl<sub>3</sub>): δ 144.8, 143.5, 141.1, 140.4, 137.9, 134.7, 133.2, 130.3, 130.0, 129.0, 128.0, 127.0, 125.4, 117.5, 49.1, 47.0, 45.0, 21.8, 21.8. HRMS (ESI, *m/z*): calcd for C<sub>21</sub>H<sub>21</sub>ClN<sub>2</sub>O<sub>4</sub>S: [M+Na]<sup>+</sup> = 455.0803, found: 455.0816. IR (neat, cm<sup>-1</sup>): 3300, 3058, 2924, 2854, 2584, 2306, 1919, 1803, 1722, 1641, 1596, 1527, 1453, 1414, 1346, 1265, 1229, 1167, 1115, 1013, 951, 891, 856, 813, 734, 657, 549, 483, 443.

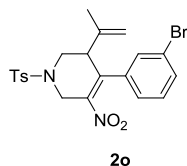

**4-(3-bromophenyl)-5-nitro-3-(prop-1-en-2-yl)-1-tosyl-1,2,3,6-tetrahydropyridine: 2o** Yellow solid, mp: 102–104 °C. <sup>1</sup>H NMR (400 MHz, CDCl<sub>3</sub>): δ 7.72 (d, *J* = 8.4 Hz, 2 H), 7.44 (dd, *J* = 0.8 Hz, 8 Hz, 1 H), 7.38 (d, *J* = 8.4 Hz, 2 H), 7.13–7.19 (m, 2 H), 6.96 (d, *J* = 7.6 Hz, 2 H), 4.95 (s, 1 H), 4.76 (s, 1 H), 4.49–4.54 (m, 1 H), 3.84 (dd, *J* = 2.0 Hz, 16.4 Hz, 1 H), 3.64 (dd, *J* = 3.6 Hz, 12 Hz, 1 H), 3.24 (s, 1 H), 3.04–3.09 (m, 1 H), 2.47 (s, 3 H), 1.71 (s, 3 H). <sup>13</sup>C NMR (100 MHz, CDCl<sub>3</sub>): δ 144.8, 143.5, 141.0, 140.3, 138.1, 133.2, 131.9, 130.3, 130.2, 129.8, 128.0, 125.9, 122.6, 117.5, 49.1, 47.0, 45.0, 21.8, 21.8. HRMS (ESI, *m/z*): calcd for C<sub>21</sub>H<sub>21</sub>BrN<sub>2</sub>O<sub>4</sub>S: [M+Na]<sup>+</sup> = 499.0298, found: 499.0313. IR (neat, cm<sup>-1</sup>): 3341, 3067, 2924, 2857, 2585, 2369, 1924, 1808, 1720, 1644, 1595, 1527, 1458, 1406, 1344, 1292, 1263, 1227, 1166, 1117, 1042, 950, 905, 858, 787, 723, 658, 550, 486, 435.

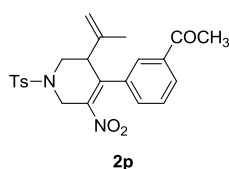

**1-(3-(5-nitro-3-(prop-1-en-2-yl)-1-tosyl-1,2,3,6-tetrahydropyridin-4-yl)phenyl)ethanone: 2p** <sup>1</sup>H NMR (400 MHz, CDCl<sub>3</sub>): δ 7.89 (d, *J* = 8.0 Hz, 2 H), 7.63–7.74 (m, 2 H), 7.38–7.44 (m, 3 H), 7.23–7.26 (m, 2 H), 4.93 (s, 1 H), 4.77 (s, 1 H), 4.55 (d, *J* = 16.8 Hz, 1 H), 3.81–3.86 (m, 1 H), 3.64–3.68 (m, 1 H), 3.32 (s, 1 H), 3.05–3.10 (m, 1 H), 2.56 (s, 3 H), 2.47 (s, 3 H), 1.71 (s, 3 H). <sup>13</sup>C NMR (100 MHz, CDCl<sub>3</sub>): δ 197.4, 144.8, 143.5, 141.2, 137.4, 136.9, 133.1, 131.9, 130.3, 129.0, 128.9, 128.0, 126.5, 117.4, 49.3, 47.0, 45.0, 26.8, 21.9, 21.8. HRMS (ESI, *m/z*): calcd for C<sub>23</sub>H<sub>24</sub>N<sub>2</sub>O<sub>5</sub>S: [M+Na]<sup>+</sup> = 463.1298, found: 463.1308. IR (neat, cm<sup>-1</sup>): 3357, 3058, 2925, 2857, 2373, 2307, 1923, 1810, 1687, 1646, 1598, 1528, 1494, 1426, 1358, 1346, 1267, 1221, 1168, 1116, 1019, 953, 907, 857, 816, 740, 703, 670, 574, 550, 481.

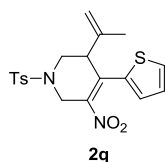

**5-nitro-3-(prop-1-en-2-yl)-4-(thiophen-2-yl)-1-tosyl-1,2,3,6-tetrahydropyridine: 2q** Yellow solid, mp: 126–128 °C. <sup>1</sup>H NMR (400 MHz, CDCl<sub>3</sub>): δ 7.70 (d, *J* = 8.4 Hz, 2 H), 7.34–7.38 (m, 3 H), 6.95–6.97 (m, 2 H), 5.02 (s, 1 H), 4.86 (s, 1 H), 4.50 (d, *J* = 16.4 Hz, 1 H), 3.70–3.80 (m, 2 H), 3.29 (d, *J* = 1.6 Hz, 1 H), 2.95 (dd, *J* = 4.4 Hz, 12 Hz, 1 H), 2.45 (s, 3 H), 1.82 (s, 3 H). <sup>13</sup>C NMR (100 MHz, CDCl<sub>3</sub>): δ 144.7, 143.2, 141.7, 136.0, 133.1, 131.8, 130.3, 128.0, 128.0, 127.8, 127.6, 117.2, 49.0, 46.9, 45.5, 21.9, 21.8. HRMS (ESI, *m/z*): calcd for C<sub>19</sub>H<sub>20</sub>FN<sub>2</sub>O<sub>4</sub>S<sub>2</sub>: [M+Na]<sup>+</sup> = 427.0757, found: 427.0771. IR (neat, cm<sup>-1</sup>): 3391, 3085, 2923, 2857, 2374, 1782, 1707, 1645, 1597, 1528, 1458, 1348, 1230, 1166, 1111, 1019, 969, 906, 850, 816, 716, 658, 549.

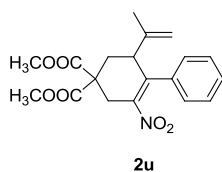

**Dimethyl 2-nitro-6-(prop-1-en-2-yl)-5,6-dihydro-[1,1'-biphenyl]-4,4(3H)-dicarboxylate: 2u** Yellow solid, mp: 90–92 °C. <sup>1</sup>H NMR (400 MHz, CDCl<sub>3</sub>): δ 7.26–7.28 (m, 3 H), 7.02–7.05 (m, 2 H), 4.73 (d, J = 10.8 Hz, 2 H), 3.81 (s, 3 H), 3.76 (s, 3 H), 3.56 (d, J = 6.8 Hz, 1 H), 3.20–3.33 (m, 2 H), 2.55–2.61 (m, 1 H), 2.10–2.16 (m, 1 H), 1.55 (s, 3 H). <sup>13</sup>C NMR (100 MHz, CDCl<sub>3</sub>): δ 170.6, 170.2, 145.2, 142.9, 139.1, 136.0, 128.5, 127.2, 116.5, 53.5, 53.4, 53.3, 47.5, 33.0, 32.3, 19.7. HRMS (ESI, m/z): calcd for C<sub>19</sub>H<sub>21</sub>NO<sub>6</sub>: [M+Na]<sup>+</sup> = 382.1261, found: 382.1271. IR (neat, cm<sup>-1</sup>): 3570, 3469, 3058, 3026, 2955, 2854, 2373, 1952, 1735, 1646, 1599, 1525, 1436, 1359, 1298, 1262, 1201, 1099, 1049, 957, 905, 846, 769, 737, 702, 609, 534.

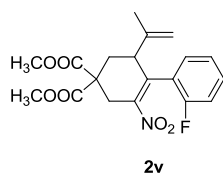

**Dimethyl 2'-fluoro-2-nitro-6-(prop-1-en-2-yl)-5,6-dihydro-[1,1'-biphenyl]-4,4(3 H)-dicarboxylate: 2v** <sup>1</sup>H NMR (400 MHz, CDCl<sub>3</sub>): δ 7.24–7.32 (m, 2 H), 7.05–7.09 (m, 1 H), 6.96–7.03 (m, 2 H), 4.71–4.73 (m, 2 H), 3.82 (s, 3 H), 3.78 (s, 3 H), 3.56–3.61 (m, 1 H), 3.28–3.31 (m, 2 H), 2.57–2.62 (m, 1 H), 2.10–2.16 (m, 1 H), 1.56 (s, 3 H). <sup>13</sup>C NMR (100 MHz, CDCl<sub>3</sub>): δ 170.6, 170.1, 160.1, 157.7, 146.3, 142.8, 135.3, 130.3, 130.3, 129.5, 129.0, 128.8, 124.2, 124.2, 116.4, 115.9, 115.7, 53.6, 53.5, 53.4, 33.0, 32.3, 19.5. HRMS (ESI, m/z): calcd for C<sub>19</sub>H<sub>20</sub>FNO<sub>6</sub>: [M+Na]<sup>+</sup> = 400.1067, found: 400.1179. IR (neat, cm<sup>-1</sup>): 3456, 3076, 2956, 2854, 2374, 1920, 1737, 1646, 1613, 1579, 1528, 1491, 1449, 1352, 1299, 1261, 1204, 1104, 1050, 958, 907, 847, 819, 762, 702, 610, 568, 513, 471.

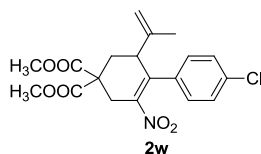

**Dimethyl 4'-chloro-2-nitro-6-(prop-1-en-2-yl)-5,6-dihydro-[1,1'-biphenyl]-4,4(3H)-dicarboxylate: 2w** <sup>1</sup>H NMR (400 MHz, CDCl<sub>3</sub>): δ 7.26 (d, J = 8.4 Hz, 2 H), 6.96–6.98 (m, 2 H), 4.71–4.76 (m, 2 H), 3.81 (s, 3 H), 3.77 (s, 3 H), 3.50–3.54 (m, 1 H), 3.20–3.31 (m, 2 H), 2.54–2.60 (m, 1 H), 2.09–2.14 (m, 1 H), 1.56 (s, 3 H). <sup>13</sup>C NMR (100 MHz, CDCl<sub>3</sub>): δ 170.2, 169.8, 145.3, 142.3, 137.8, 134.2, 128.5, 128.3, 116.5, 53.2, 53.1, 53.1, 47.2, 32.6, 32.0, 19.4. HRMS (ESI, m/z): calcd for C<sub>19</sub>H<sub>21</sub>NO<sub>6</sub>Cl: [M+Na]<sup>+</sup> = 416.0872, found: 416.0867. IR (neat, cm<sup>-1</sup>): 3366, 2956, 2372, 1737, 1647, 1594, 1526, 1491, 1435, 1352, 1297, 1261, 1200, 1095, 1015, 906, 829, 734, 612, 526.

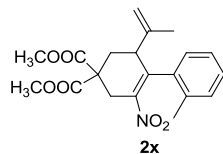

**Dimethyl 2'-methyl-2-nitro-6-(prop-1-en-2-yl)-5,6-dihydro-[1,1'-biphenyl]-4,4(3H)-dicarboxylate 2x** <sup>1</sup>H NMR (400 MHz, CDCl<sub>3</sub>): δ 7.12–7.18 (m, 2 H), 7.02–7.06 (m, 1 H), 6.82 (d, J = 7.6 Hz, 1 H), 4.68–4.73 (m, 2 H), 3.82 (s, 3 H), 3.79 (s, 3 H), 3.41–3.46 (m, 1 H), 3.21–3.37 (m, 2 H), 2.55–2.61 (m, 1 H), 2.14–2.20 (m, 1 H), 2.16 (s, 3 H), 1.56 (s, 9 H). <sup>13</sup>C NMR (100 MHz, CDCl<sub>3</sub>): δ 170.5, 170.1, 145.1, 142.5, 139.8, 134.9, 134.3, 130.0, 128.0, 127.7, 125.3, 116.0, 53.3, 53.2, 45.9, 32.6, 31.8, 20.0, 19.3. HRMS (ESI, m/z): calcd for C<sub>20</sub>H<sub>23</sub>NO<sub>6</sub>: [M+Na]<sup>+</sup> = 396.1418, found: 396.1410. IR (neat, cm<sup>-1</sup>): 3339, 2955, 2372, 1737, 1646, 1526, 1435, 1356, 1262, 1200, 1097, 1051, 956, 902, 847, 735, 703, 613.

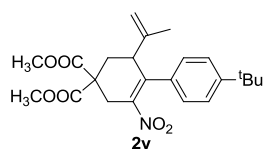

**Dimethyl 4'-(tert-butyl)-2-nitro-6-(prop-1-en-2-yl)-5,6-dihydro-[1,1'-biphenyl]-4,4(3H)-dicarboxylate 2y** <sup>1</sup>H NMR (400 MHz, CDCl<sub>3</sub>): δ 7.26 (d, *J* = 8.0 Hz, 2 H), 6.97(d, *J* = 8.4 Hz, 2 H), 4.74 (d, *J* = 10 Hz, 2 H), 3.81 (s, 3 H), 3.76 (s, 3 H), 3.55–3.60 (m, 1 H), 3.17–3.34 (m, 2 H), 2.54–2.60 (m, 1 H), 2.11–2.17 (m, 1 H), 1.57 (s, 3 H), 1.28 (s, 9 H). <sup>13</sup>C NMR (100 MHz, CDCl<sub>3</sub>): δ 170.3, 169.9, 151.1, 144.7, 142.7, 138.4, 132.5, 126.5, 125.0, 116.0, 53.2, 53.1, 53.0, 46.8, 34.4, 32.7, 32.1, 31.1, 19.4. HRMS (ESI, *m/z*): calcd for C<sub>23</sub>H<sub>29</sub>NO<sub>6</sub>: [M+Na]<sup>+</sup> = 438.1887, found: 438.1879. IR (neat, cm<sup>-1</sup>): 3371, 2959, 2370, 1738, 1647, 1608, 1527, 1435, 1363, 1262, 1200, 1110, 1048, 901, 835, 769, 739, 617, 569.

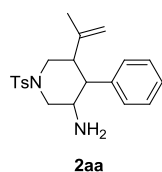

**4-phenyl-5-(prop-1-en-2-yl)-1-tosylpiperidin-3-amine: 2aa** <sup>1</sup>H NMR (400 MHz, CDCl<sub>3</sub>): δ 7.75 (d, *J* = 8 Hz, 2 H), 7.39 (d, *J* = 8 Hz, 2 H), 7.12 – 7.18 (m, 3 H), 6.99 (d, *J* = 6.8 Hz, 2 H), 4.58 (s, 1 H), 4.34 (s, 1 H), 3.77 (dd, *J* = 4.4 Hz, 12 Hz, 1 H), 3.66-3.70 (m, 1 H), 3.31 – 3.38 (m, 2H), 2.96-3.02 (m, 1 H), 2.70-2.74 (m, 1 H), 2.55-2.61 (m, 1 H), 2.49 (s, 3 H), 1.54 (s, 3 H). <sup>13</sup>C NMR (100 MHz, CDCl<sub>3</sub>): δ 143.6, 143.5, 136.8, 133.6, 130.6, 129.7, 128.0, 127.5, 126.9, 111.0, 51.0, 48.8, 48.2, 45.4, 44.5, 22.3, 21.5. HRMS (ESI, *m/z*): calcd for C<sub>21</sub>H<sub>26</sub>N<sub>2</sub>O<sub>2</sub>S: [M+H]<sup>+</sup> = 371.1783, found: 371.1788. IR (neat, cm<sup>-1</sup>): 3375, 2924, 1725, 1599, 1452, 1345, 1167, 1093, 982, 910, 816, 770, 734, 704, 659, 580, 550, 516.

## 6. The Crystal Structure of Product 2a

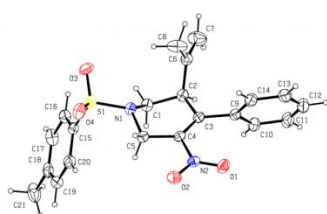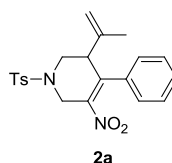

### Data Block:

Bond precision: C-C = 0.0046 Å Wavelength=0.71000

Cell: a=13.1530(8) b=17.8912(8) c=9.1269(6)  
alpha=90 beta=109.860(7) gamma=90

Temperature: 295 K

|                | Calculated      | Reported        |
|----------------|-----------------|-----------------|
| Volume         | 2020.0(2)       | 2020.0(2)       |
| Space group    | P 21/c          | P 1 21/c 1      |
| Hall group     | -P 2ybc         | -P 2ybc         |
| Moiety formula | C21 H22 N2 O4 S | C21 H22 N2 O4 S |

|                               |                                 |                 |
|-------------------------------|---------------------------------|-----------------|
| Sum formula                   | C21 H22 N2 O4 S                 | C21 H22 N2 O4 S |
| Mr                            | 398.47                          | 398.47          |
| Dx,g cm-3                     | 1.310                           | 1.310           |
| Z                             | 4                               | 4               |
| Mu (mm-1)                     | 0.189                           | 0.189           |
| F000                          | 840.0                           | 840.0           |
| F000'                         | 840.87                          |                 |
| h,k,lmax                      | 16,22,11                        | 16,22,11        |
| Nref                          | 3979                            | 3862            |
| Tmin,Tmax                     | 0.956,0.978                     | 0.865,1.000     |
| Tmin'                         | 0.950                           |                 |
| Correction method= MULTI-SCAN |                                 |                 |
| Data completeness= 0.971      | Theta(max)= 25.990              |                 |
| R(reflections)= 0.0547( 2574) | wR2(reflections)= 0.1455( 3862) |                 |
| S = 1.059                     | Npar= 255                       |                 |

## 7. References

- (a) T. Kataoka, M. Yoshimatsu, Y. Noda, T. Sato, H. Shimizu, M. Hori, *J. Chem. Soc. Perkin Trans.*, 1 1993, **1**, 121; (b) A. Gansauer, M. Otte, L. Shi, *J. Am. Chem. Soc.*, 2011, **133**, 416; (c) N. Dieltiens, K. Moonen, C. V. Stevens, *Chem. Eur. J.*, 2007, **13**, 203.

## <sup>1</sup>H NMR and <sup>13</sup>C NMR Spectra of the 1,6-Enynes

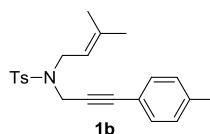

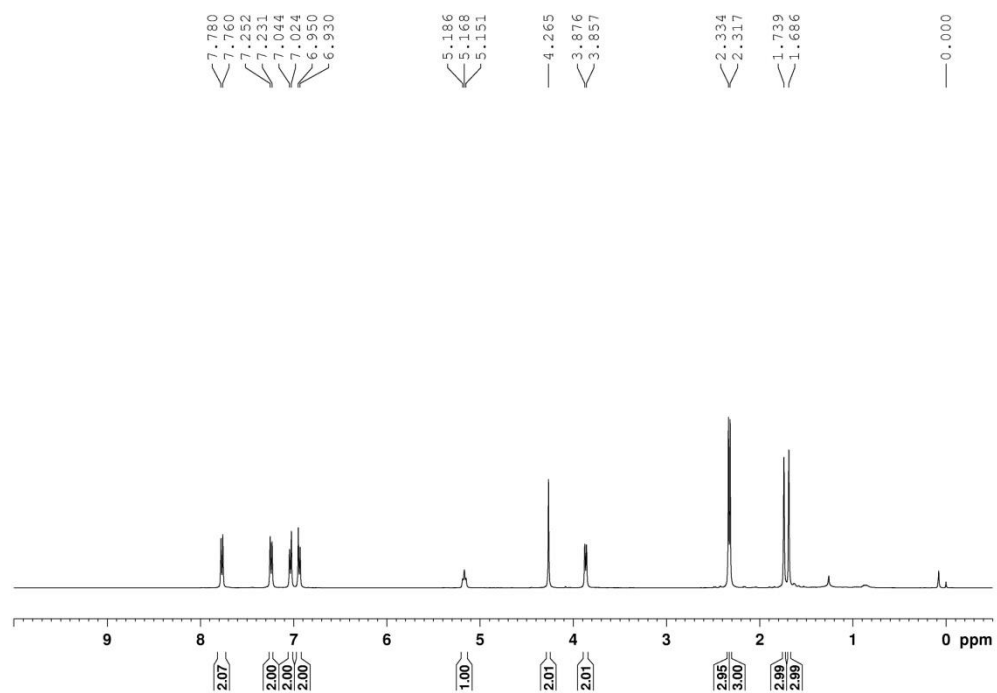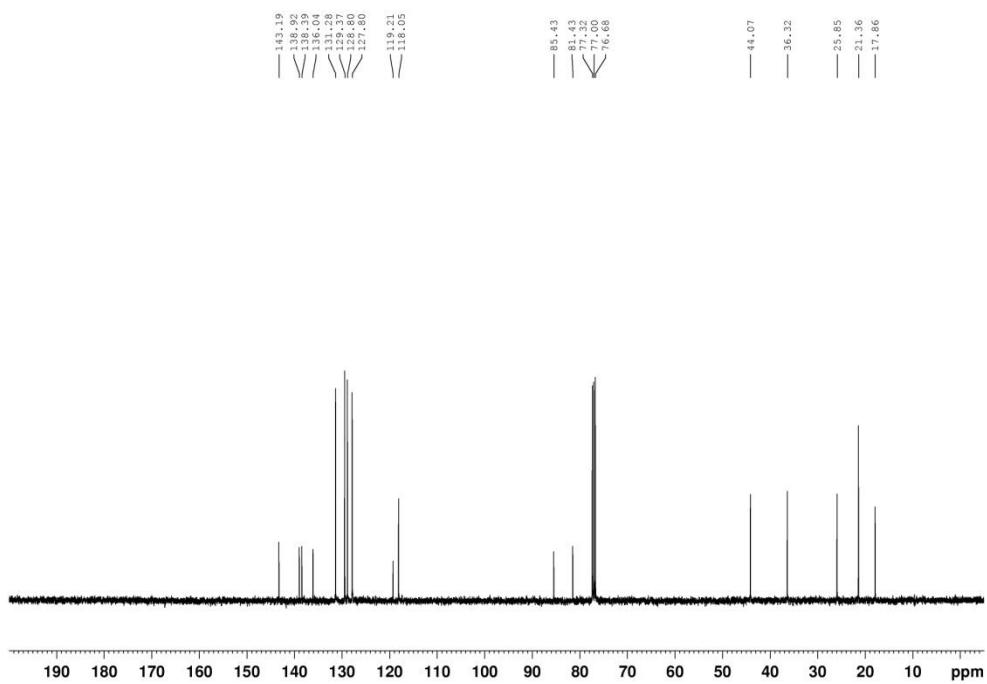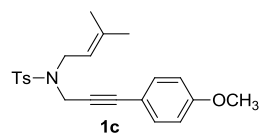

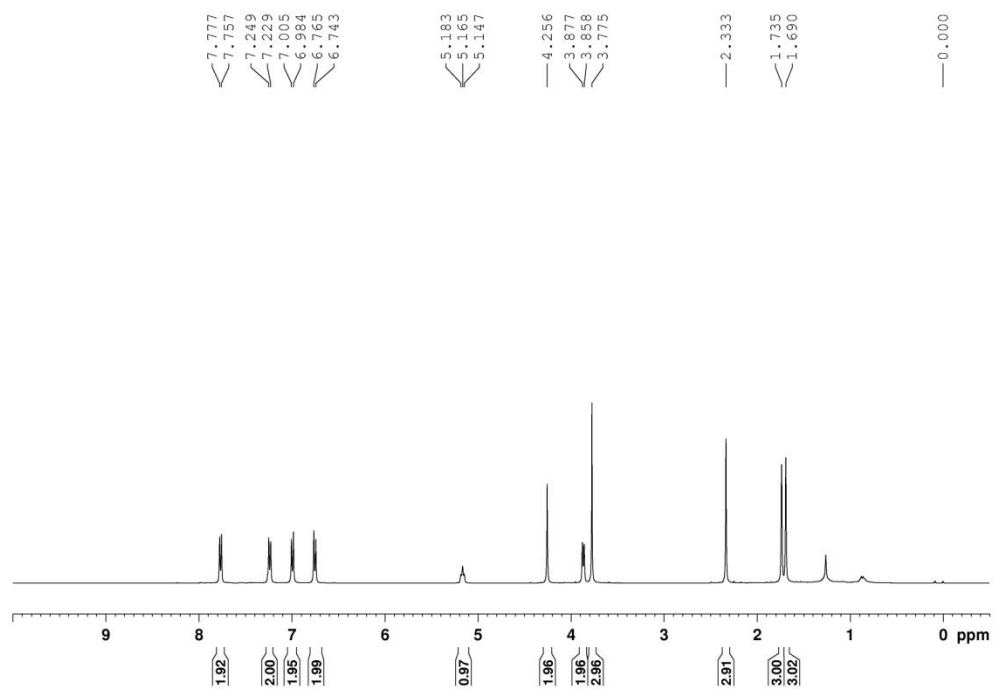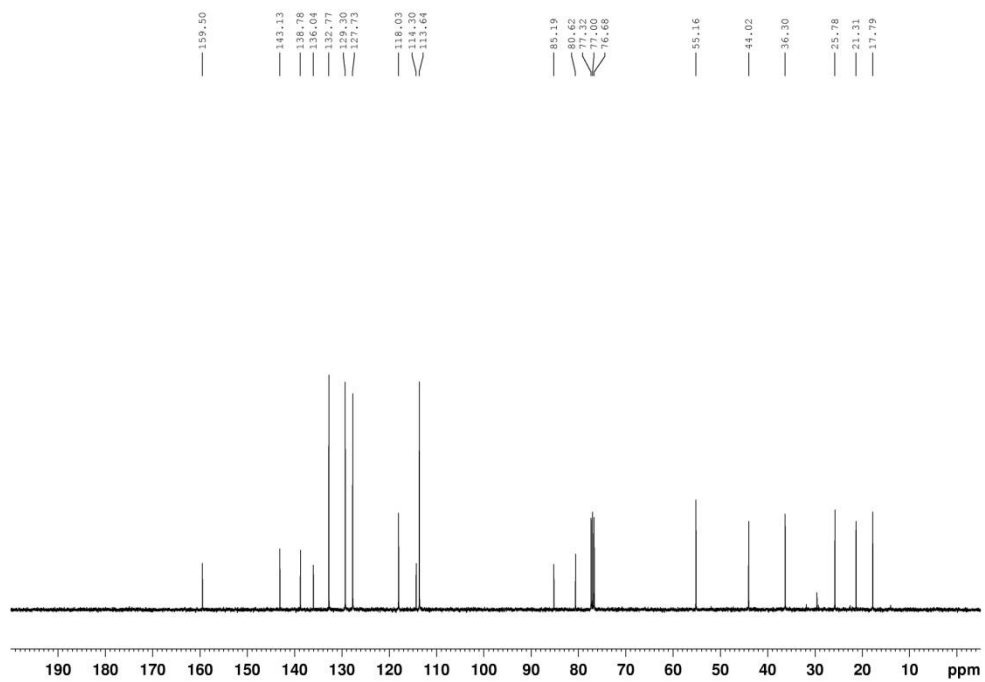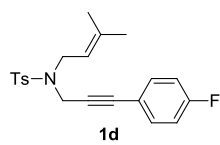



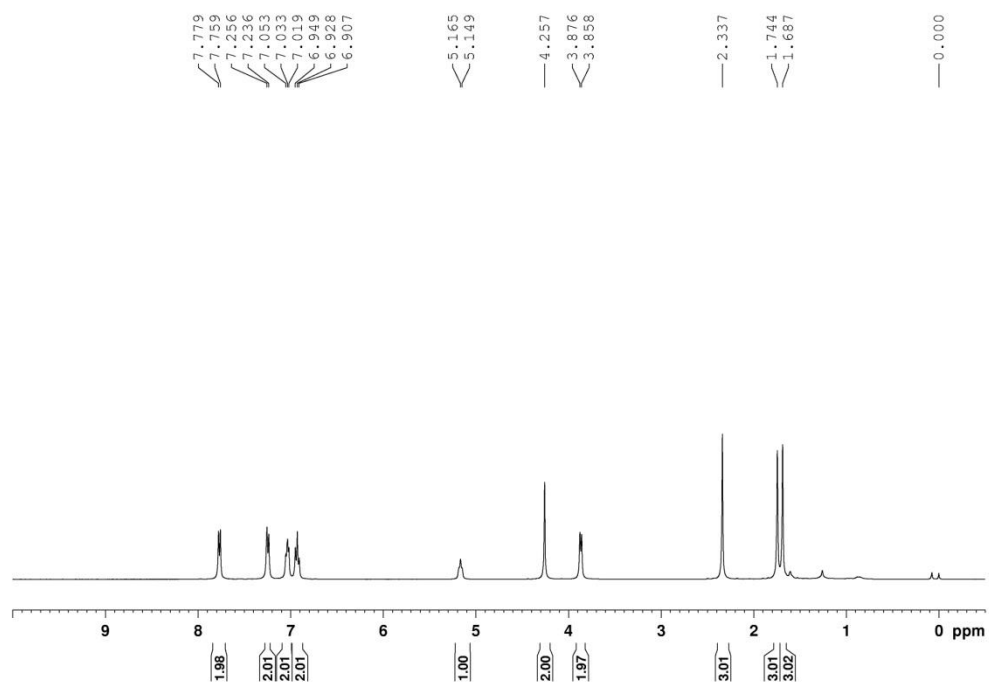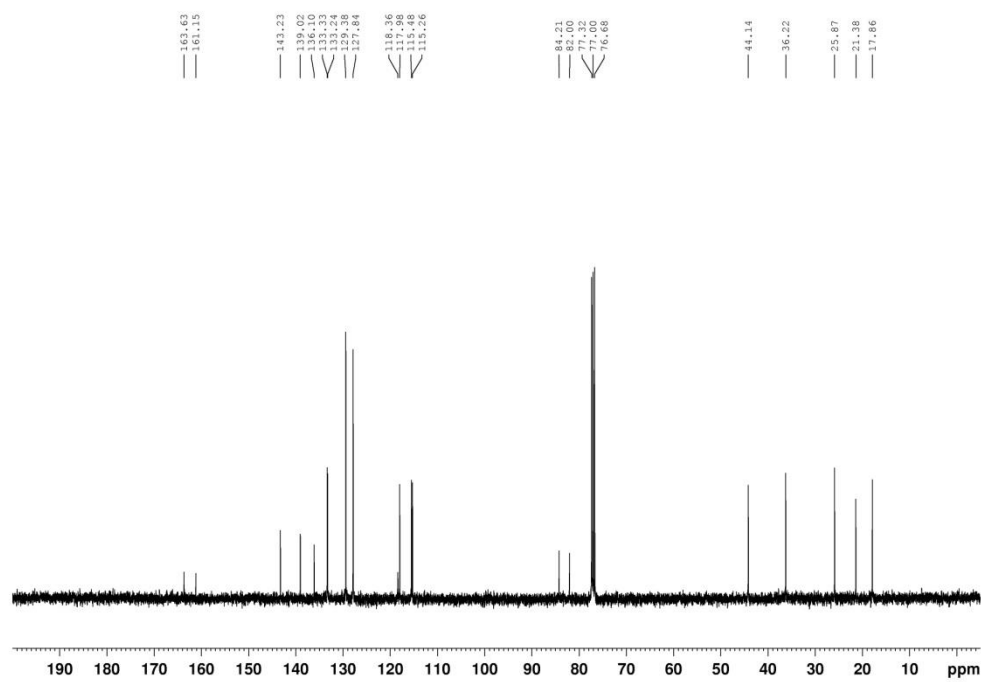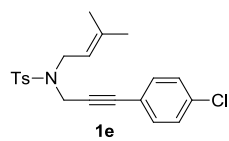

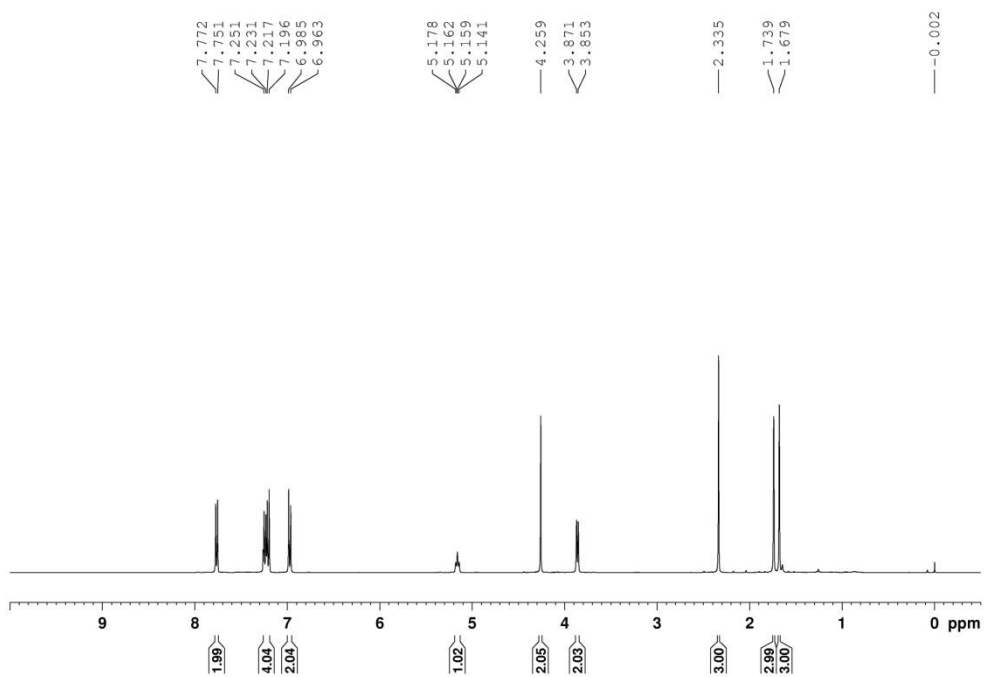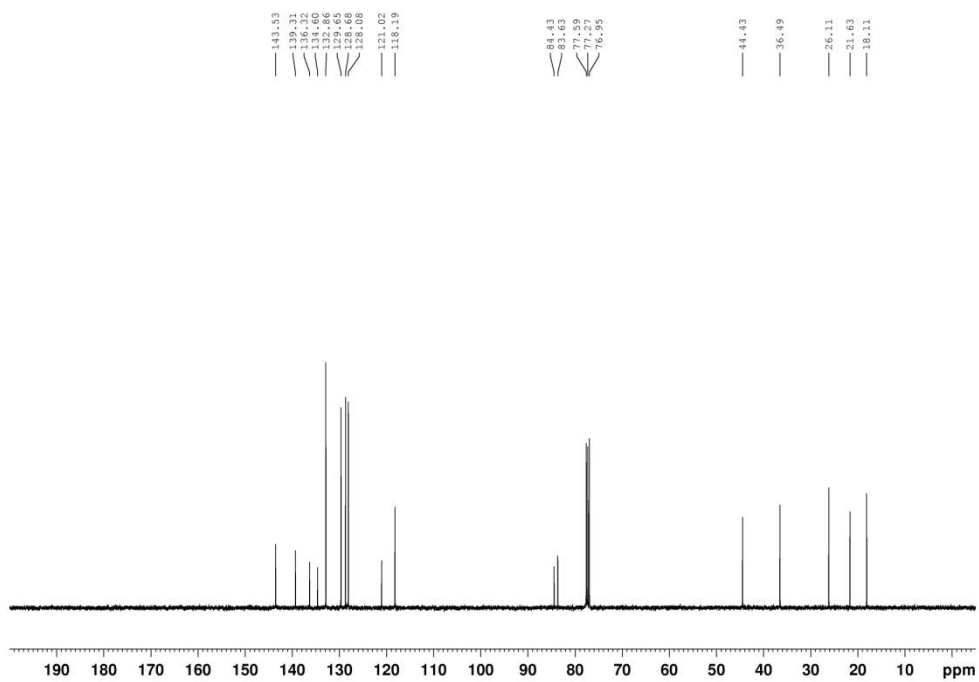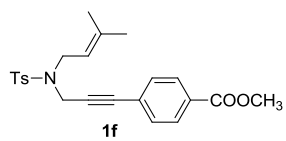

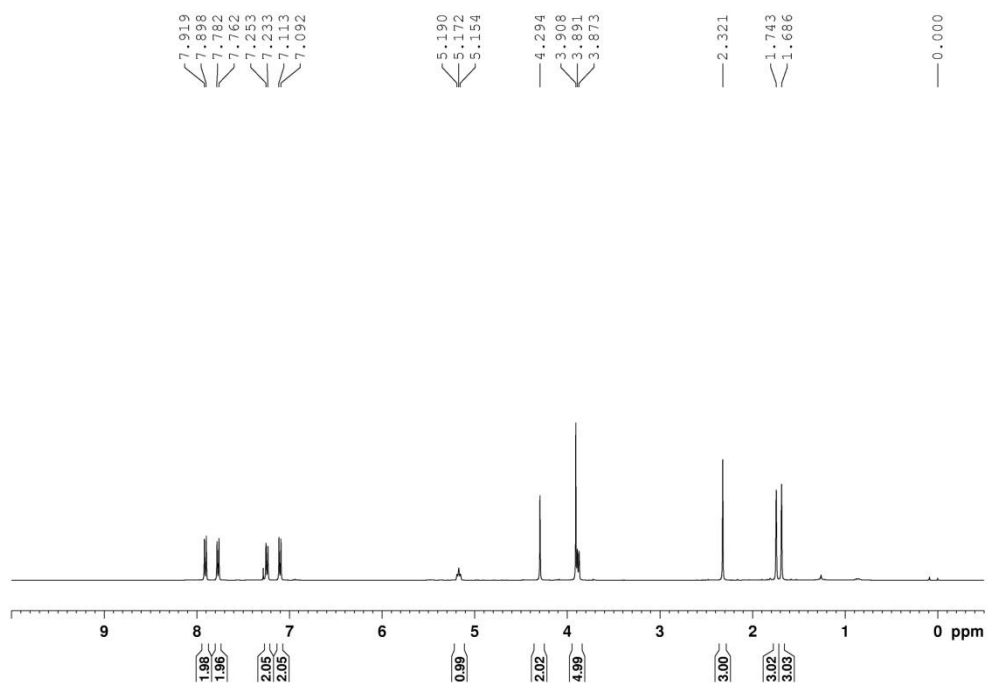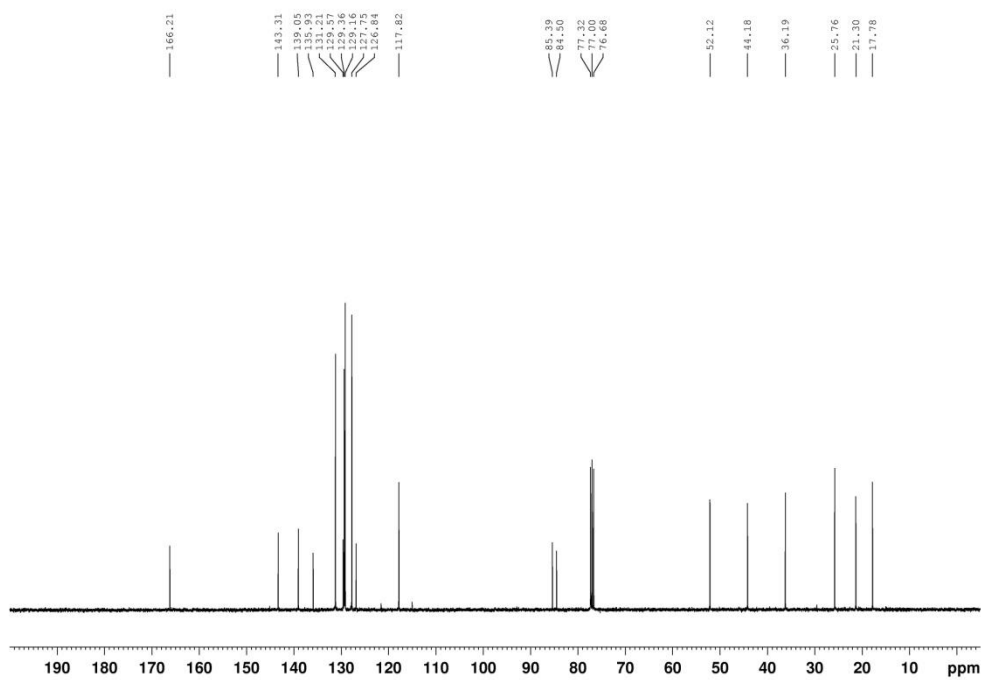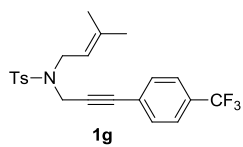

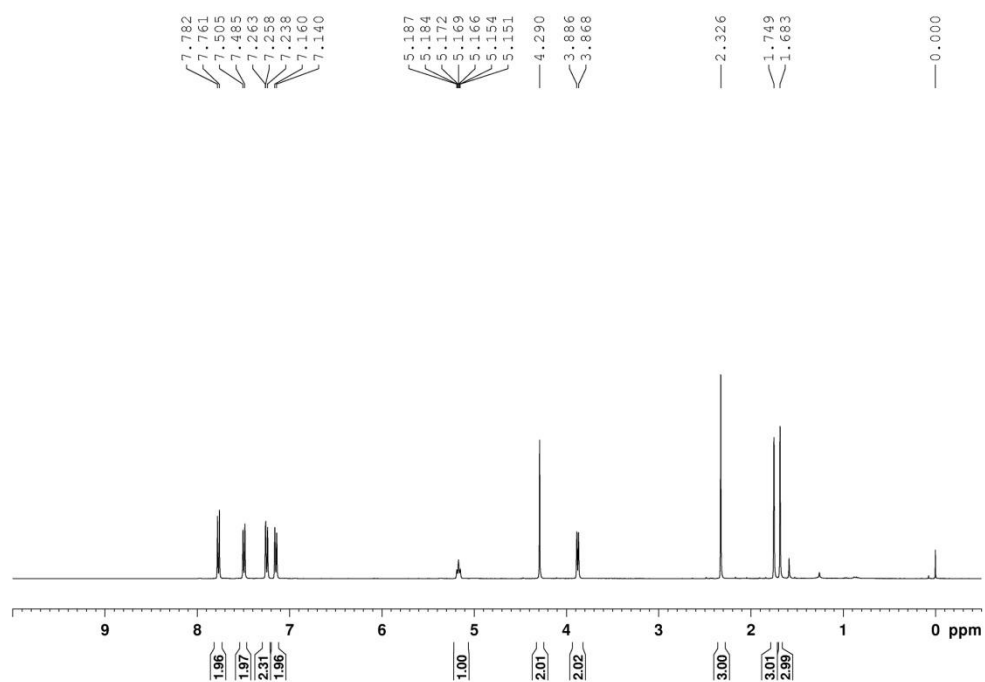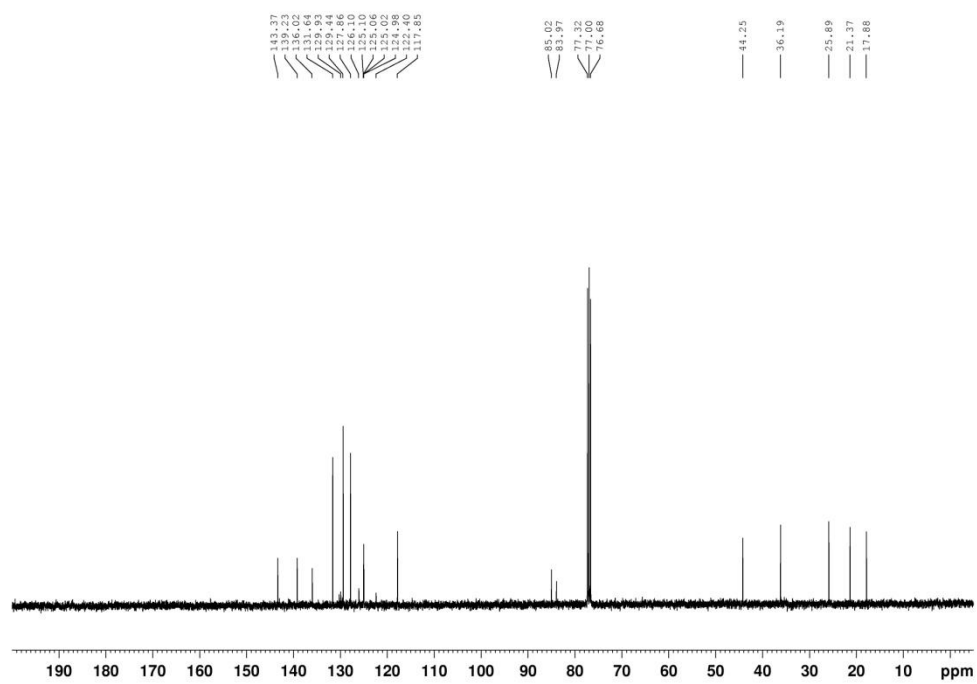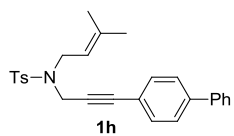

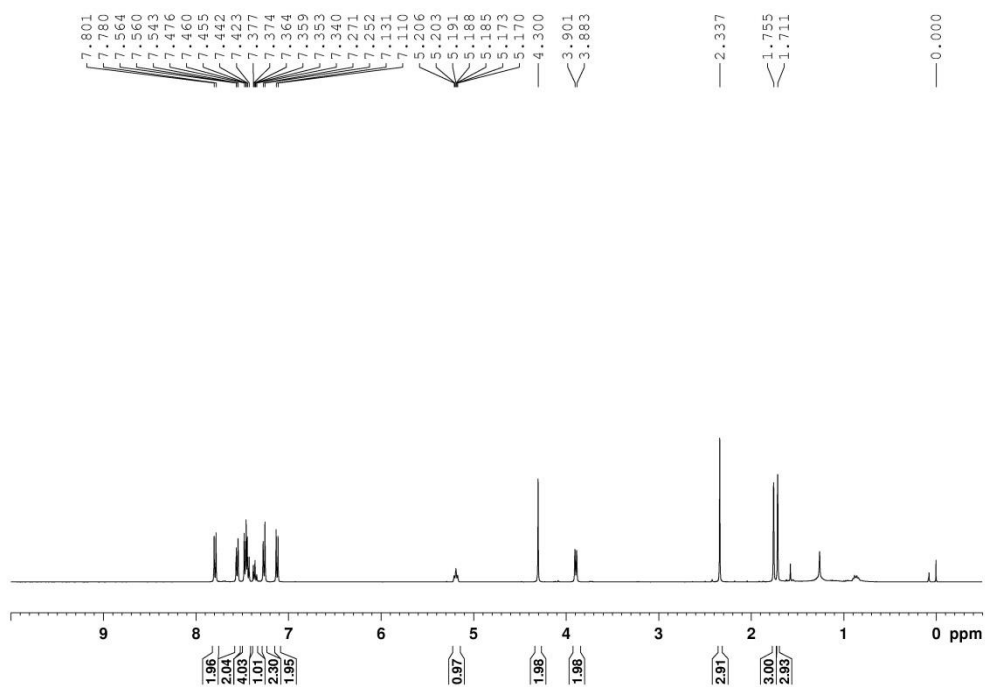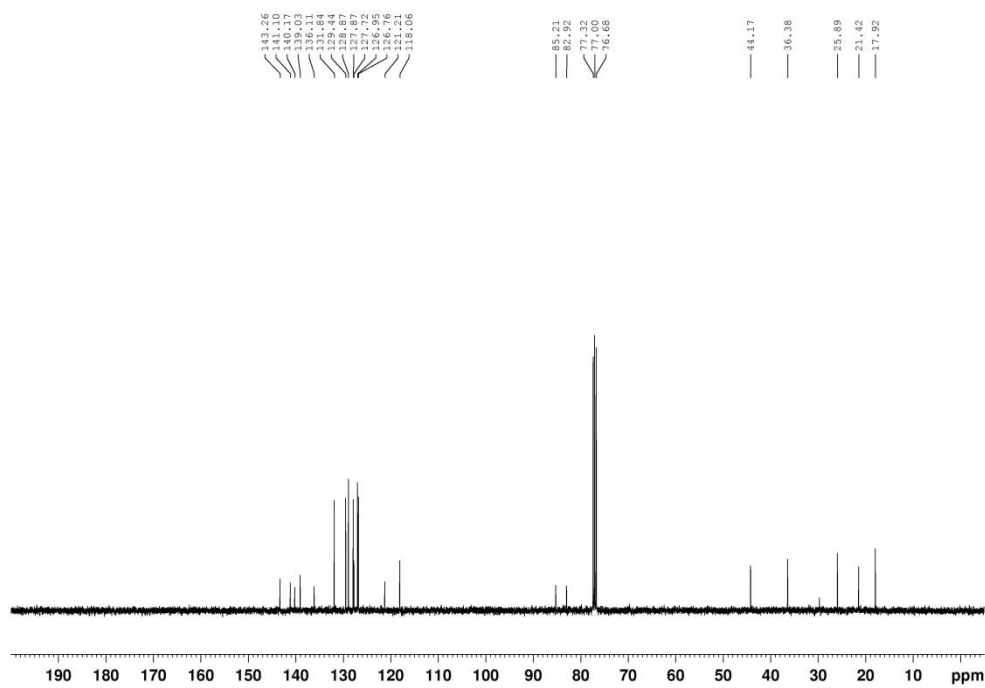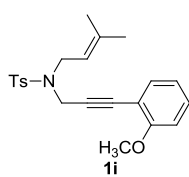

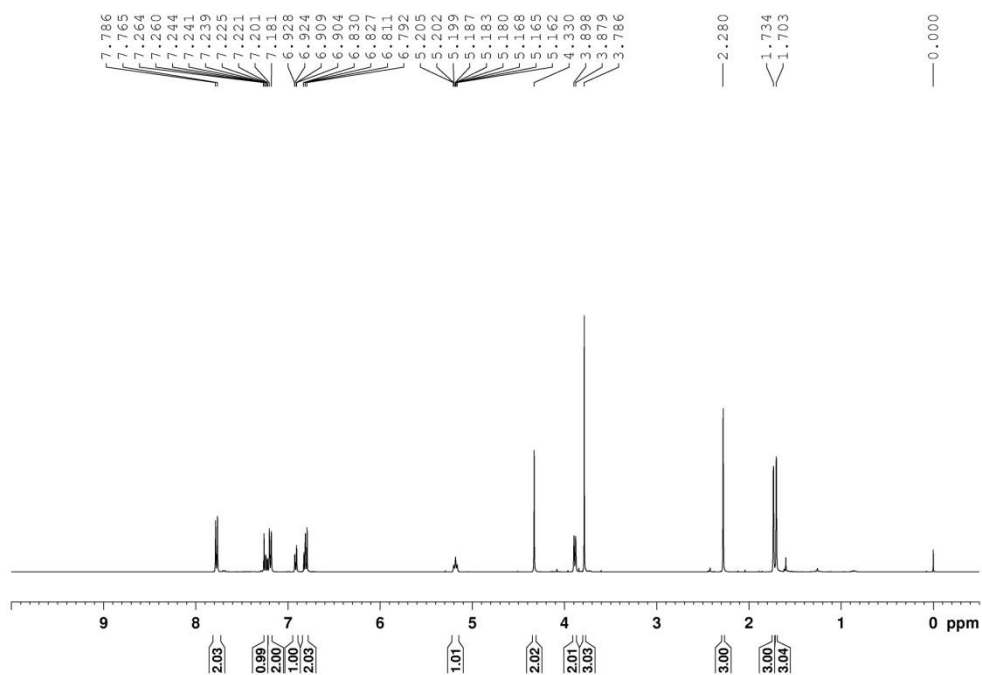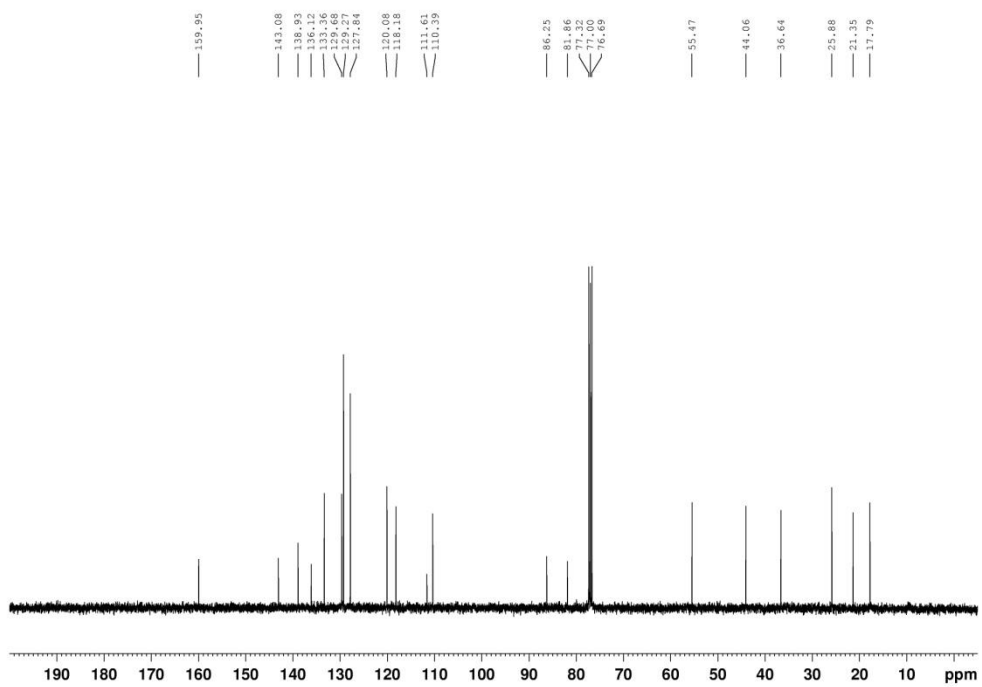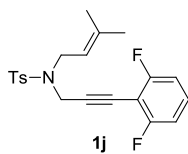

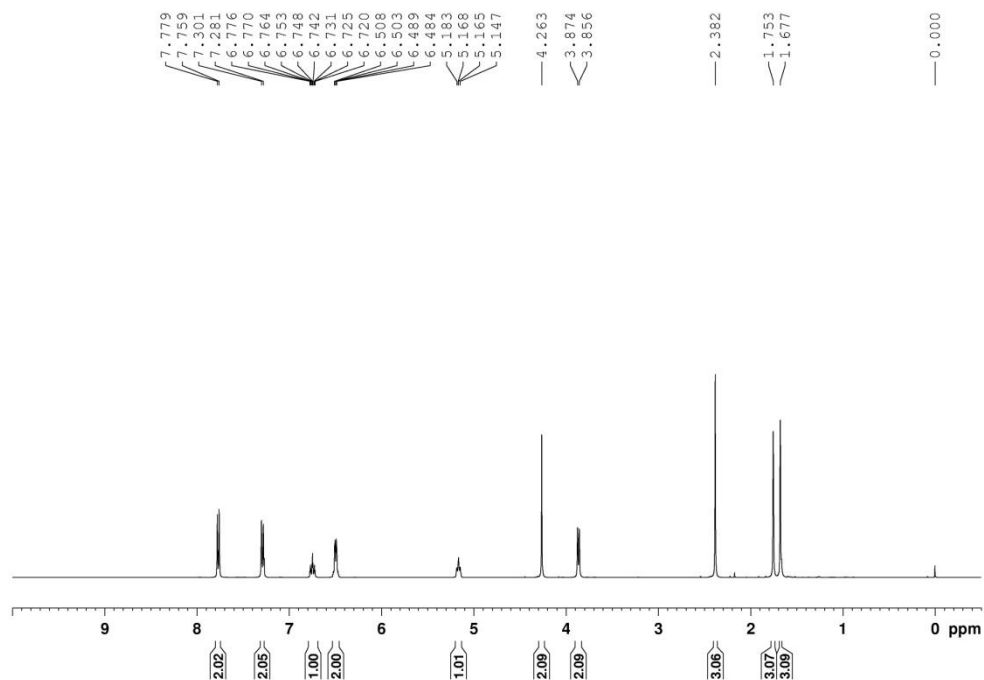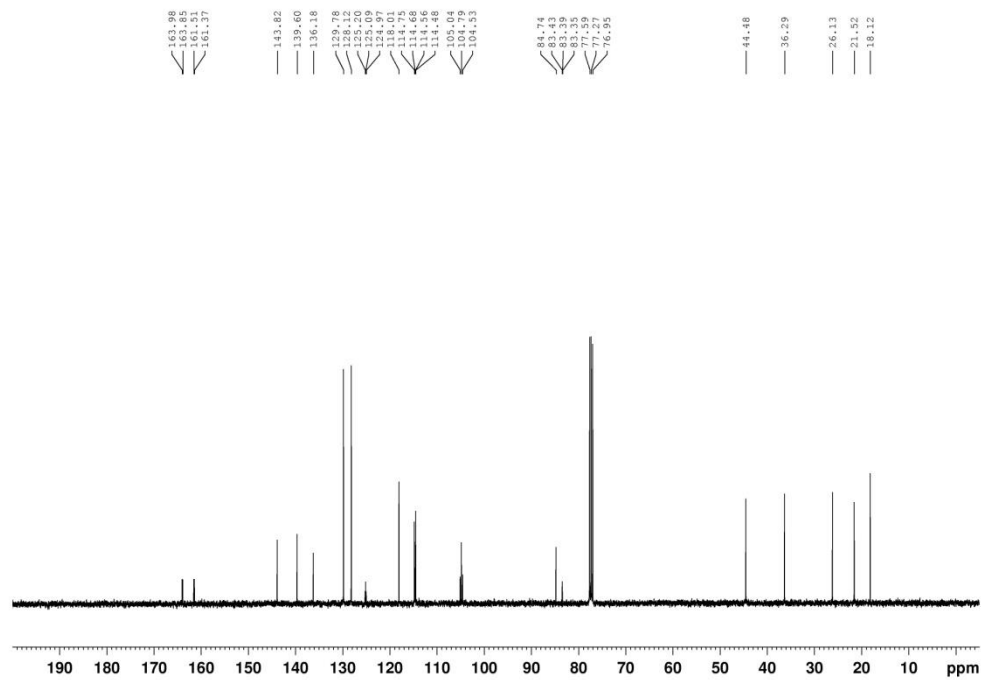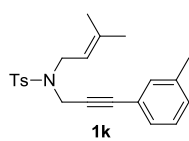

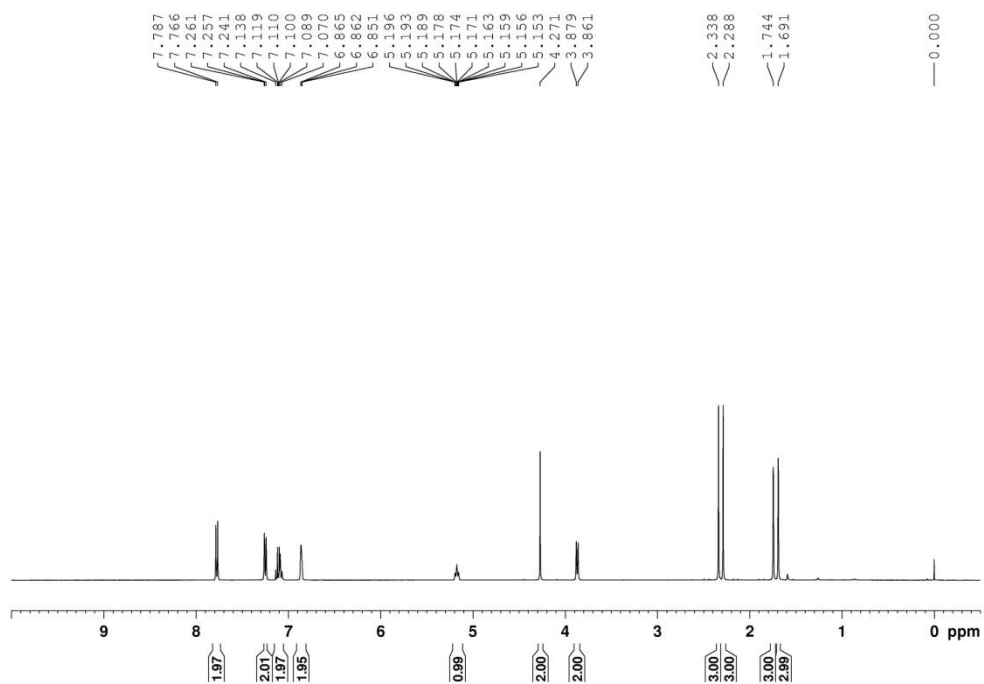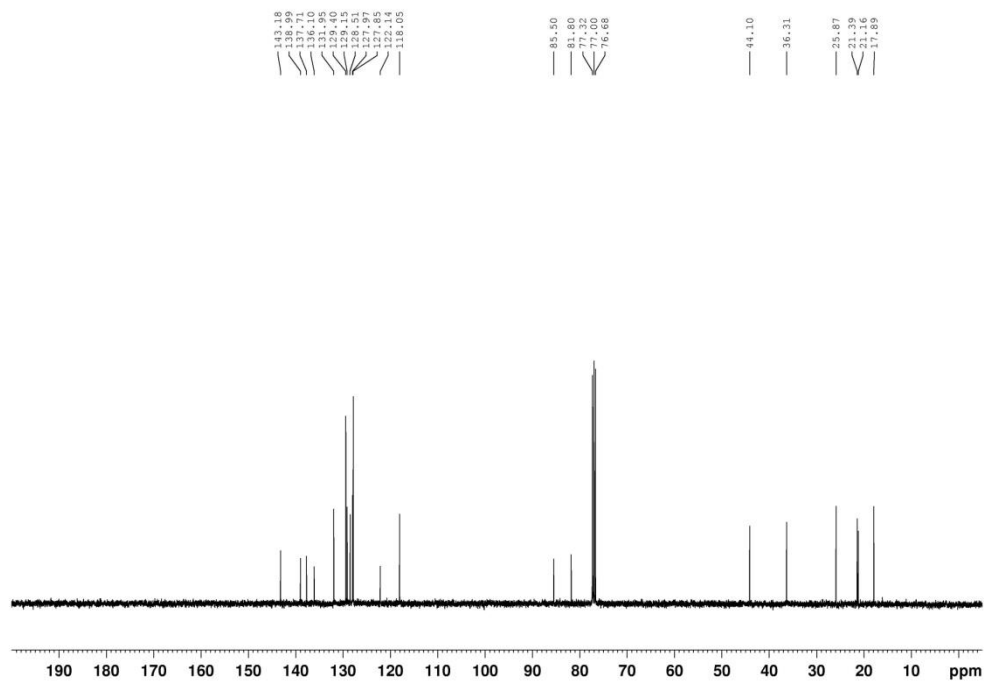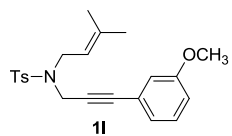



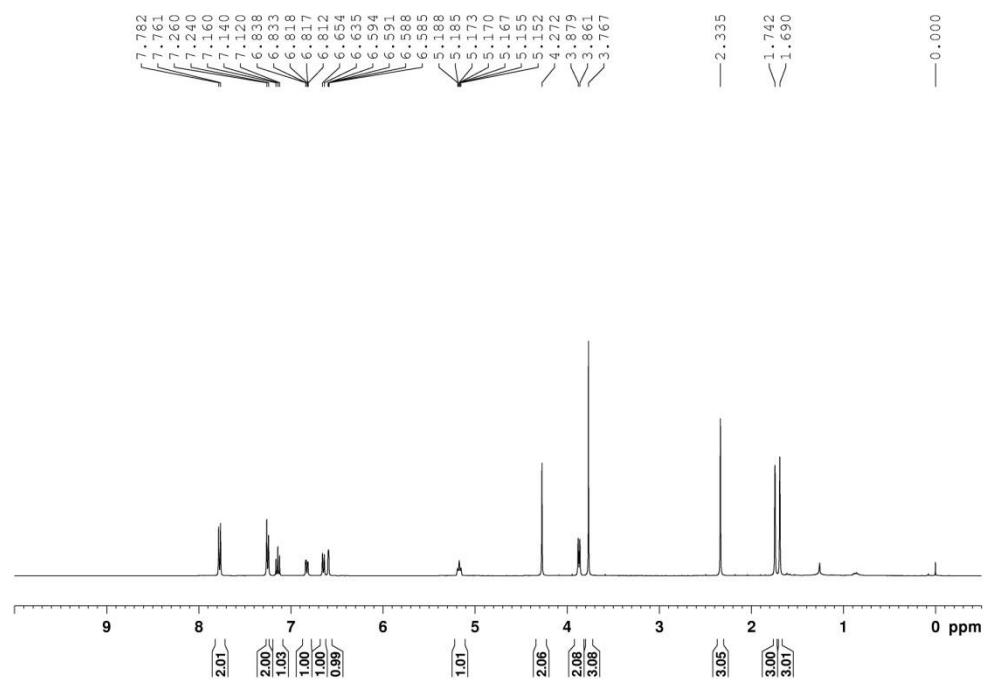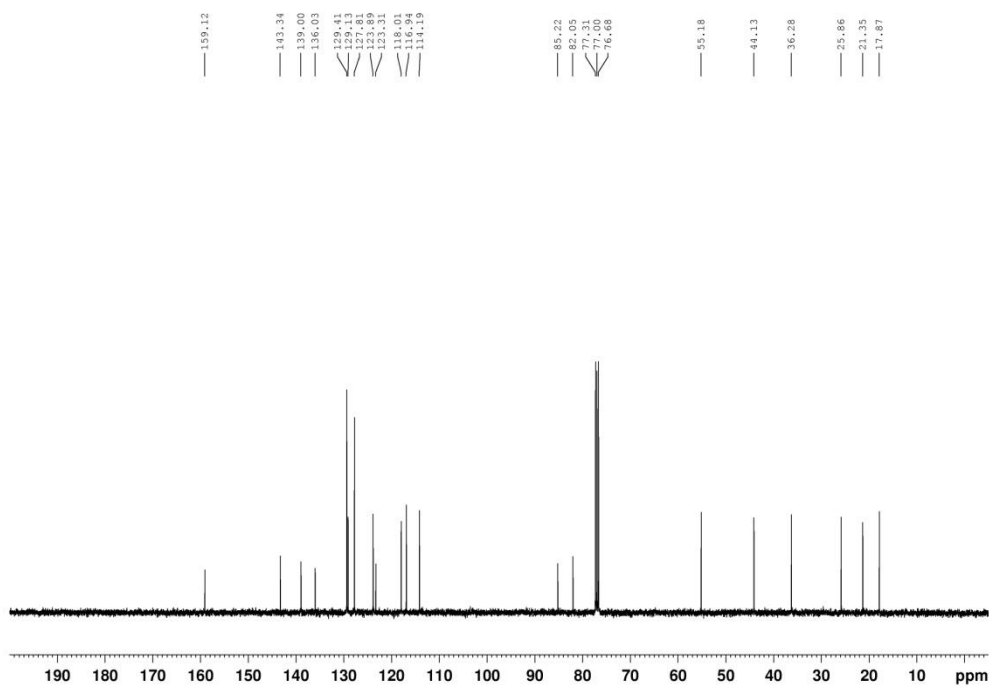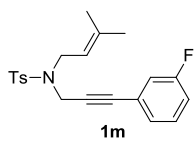

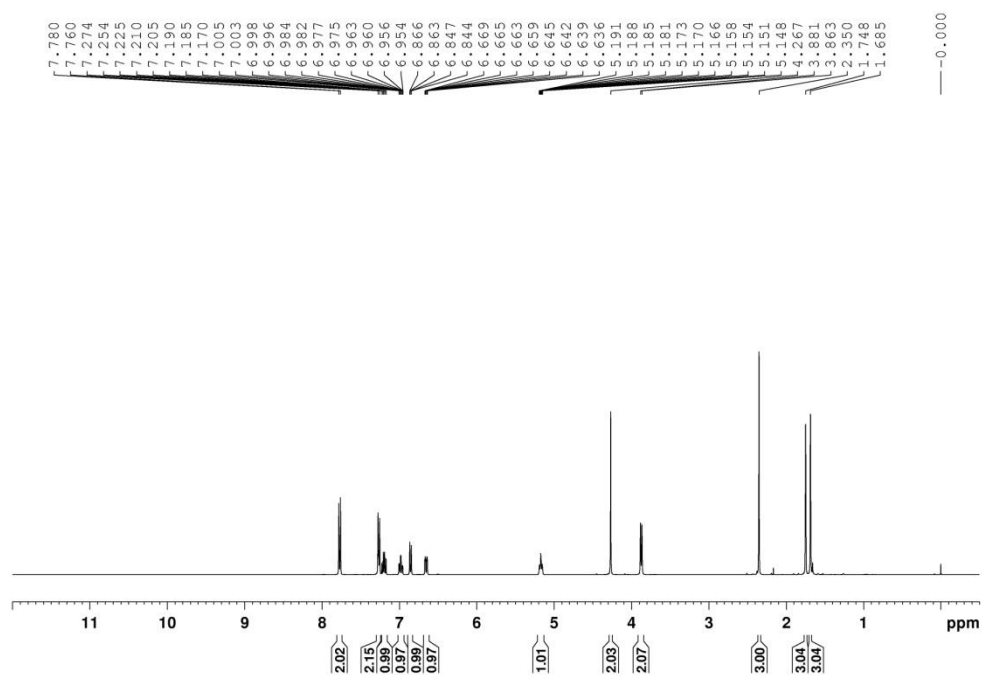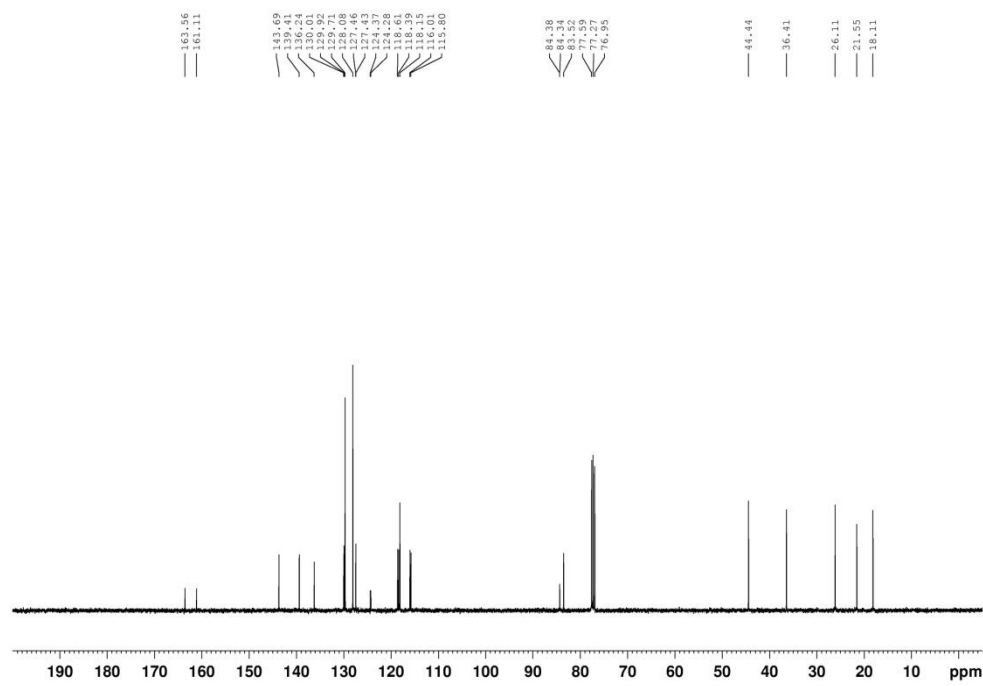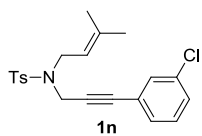

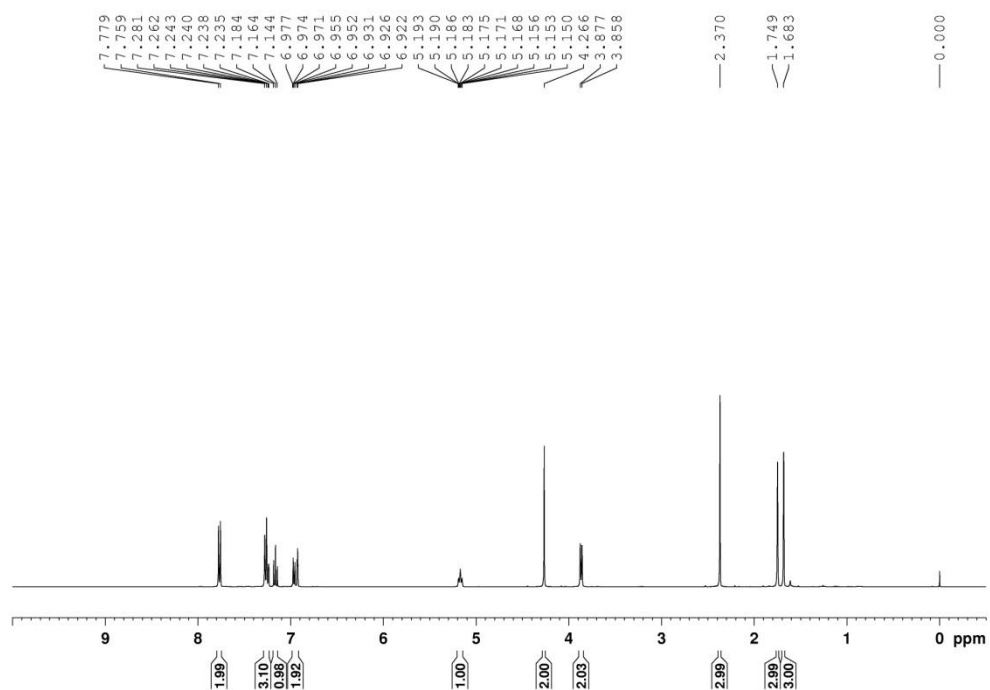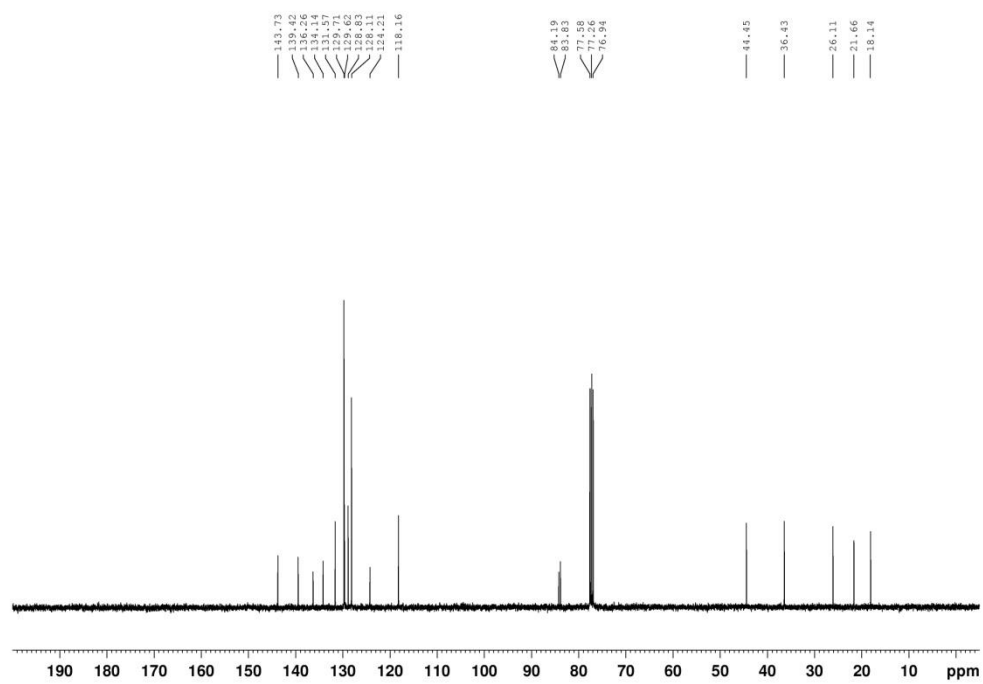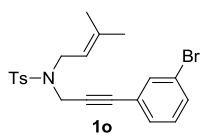

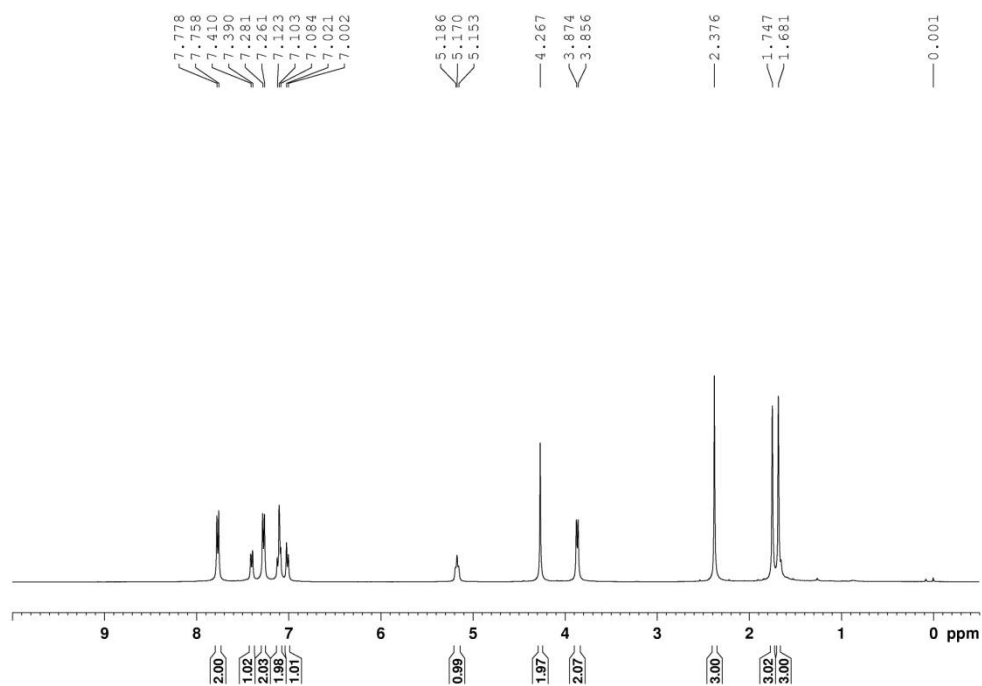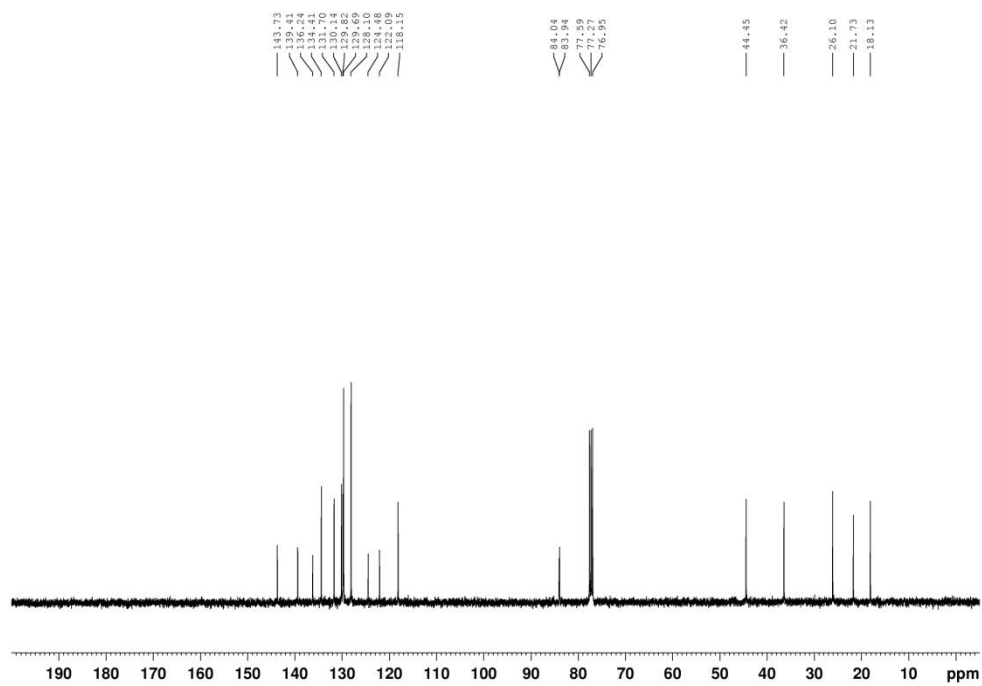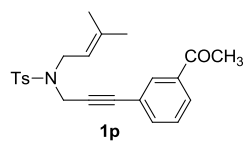

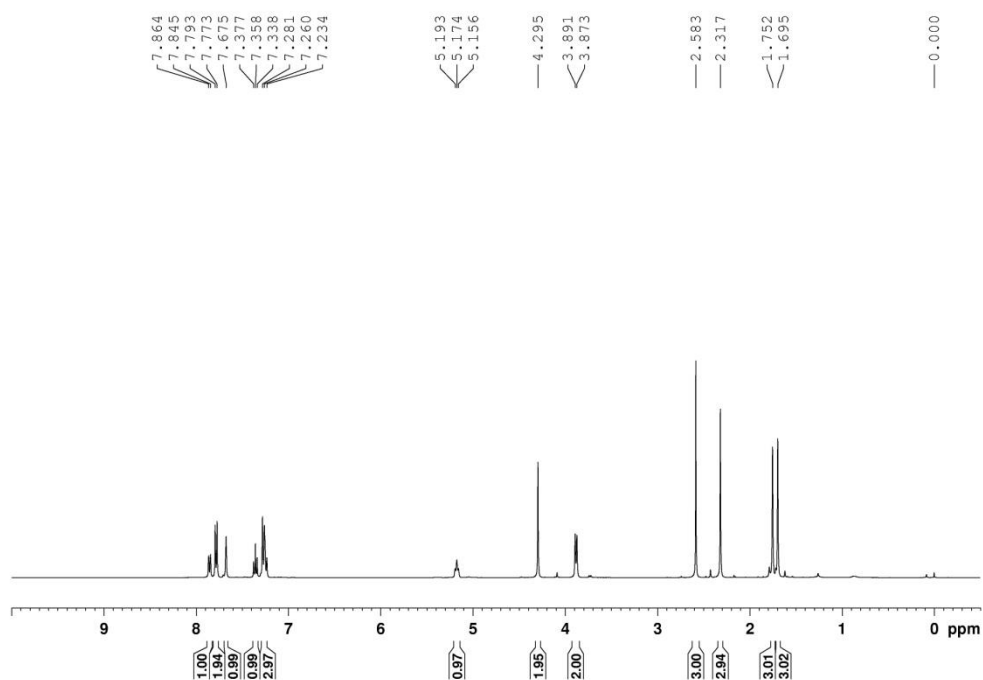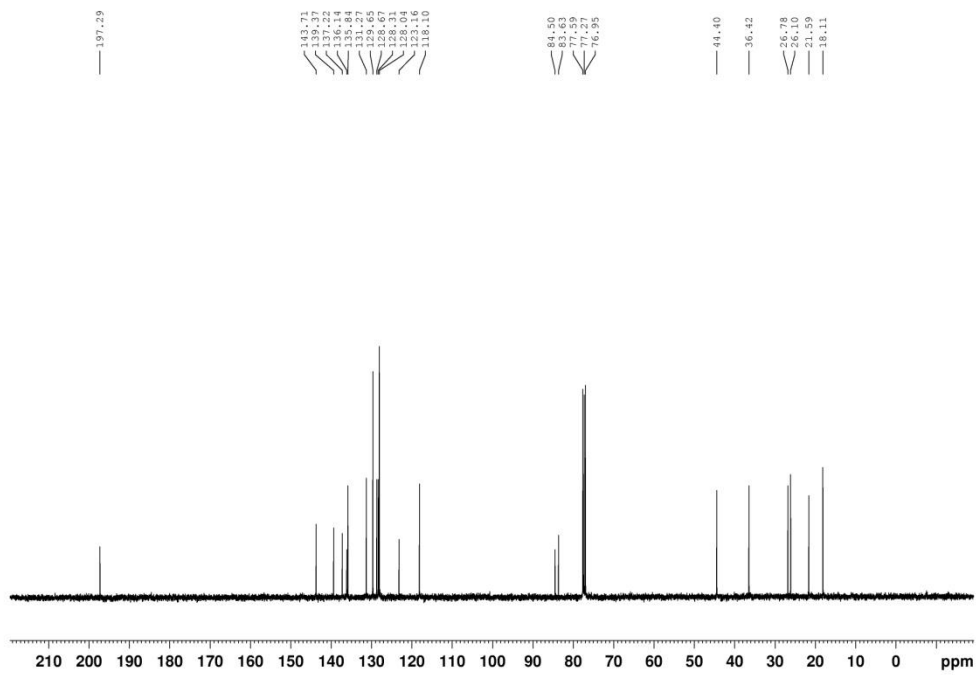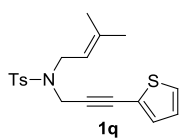

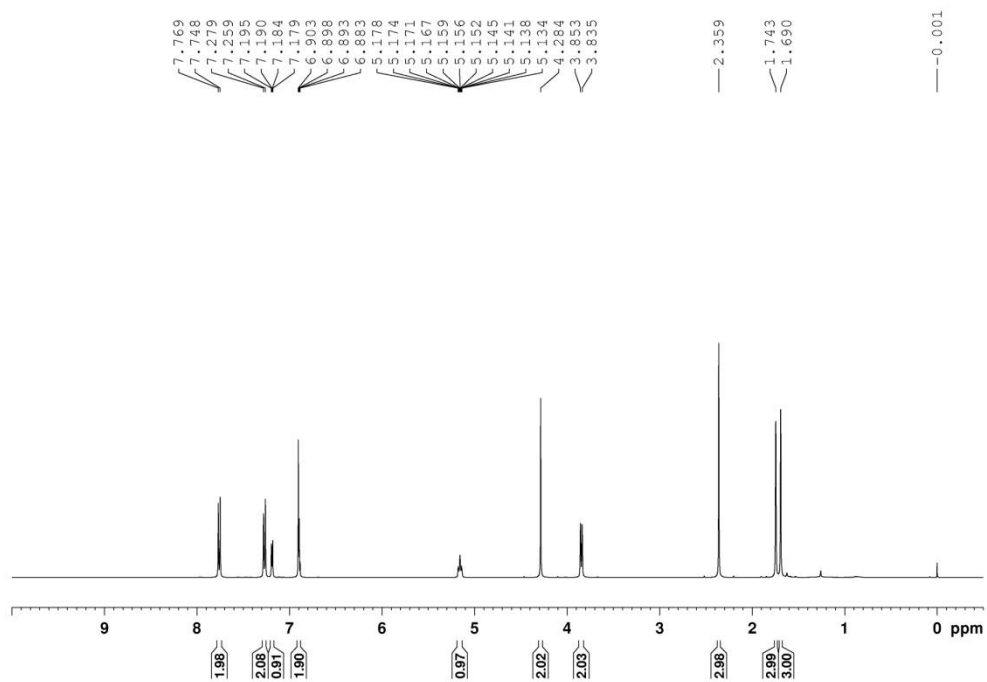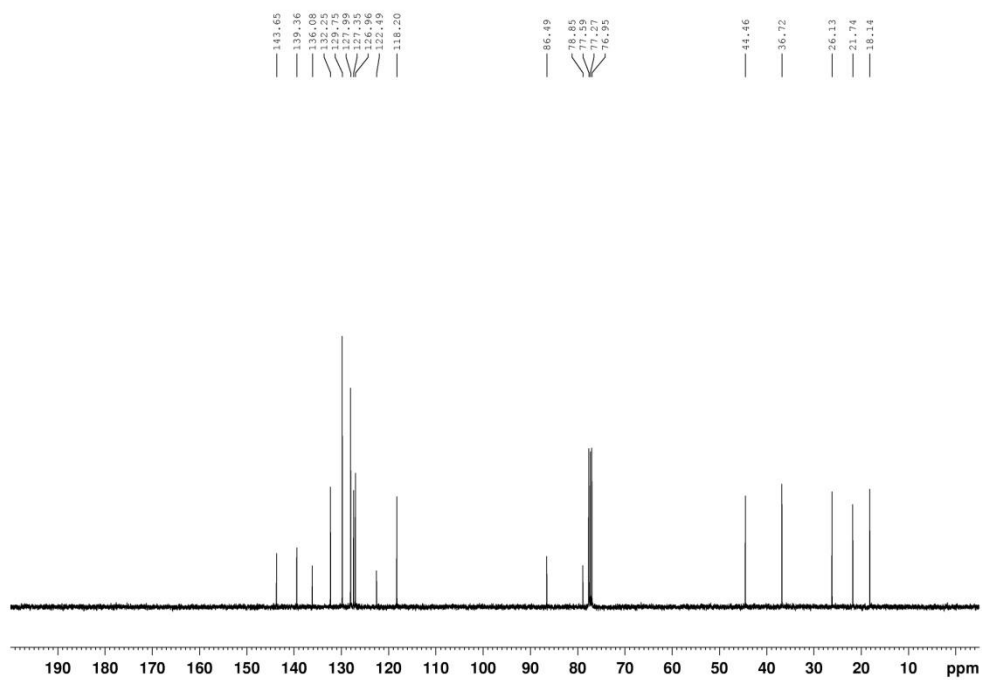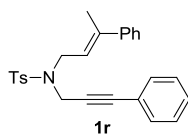

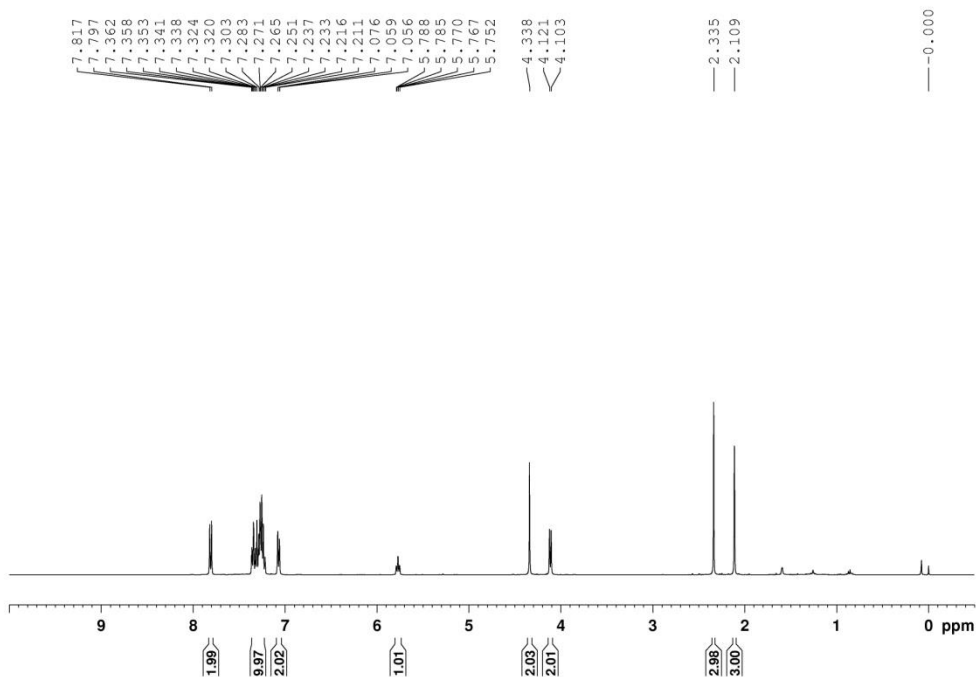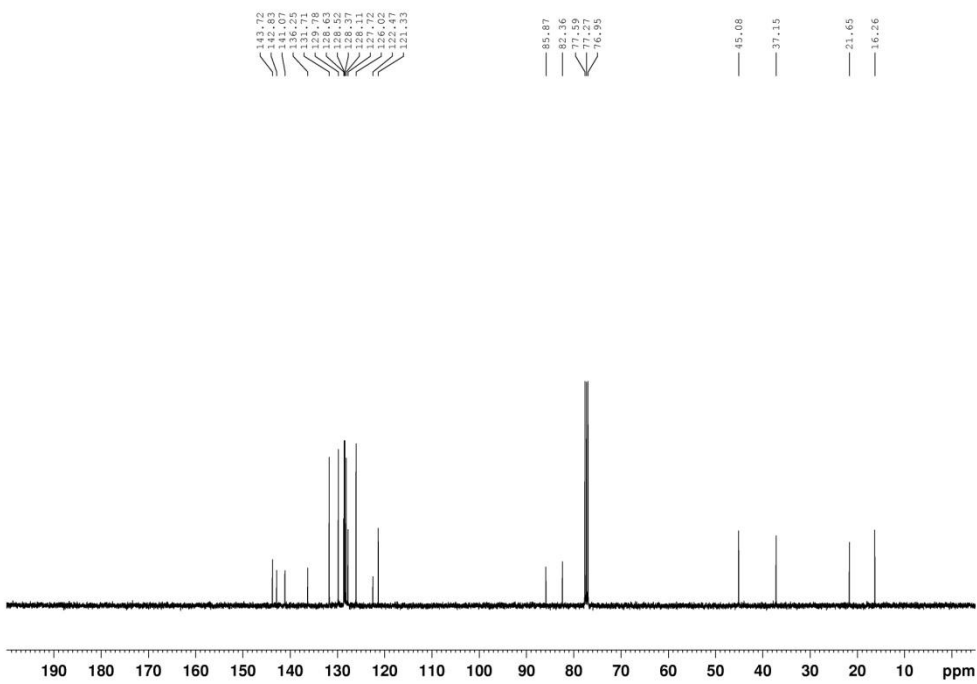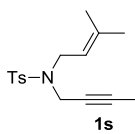

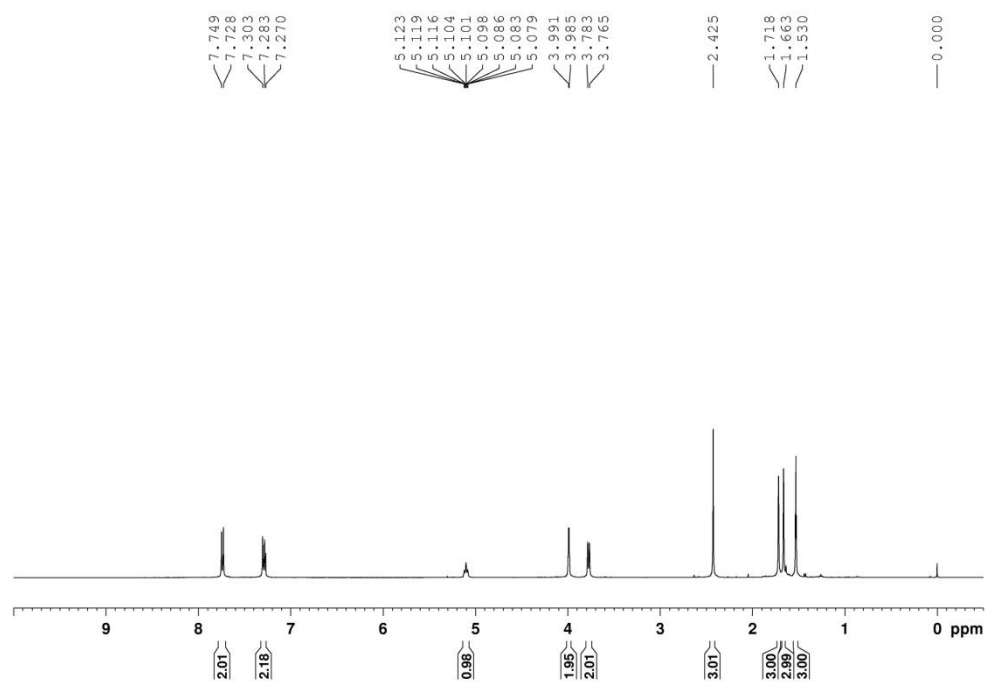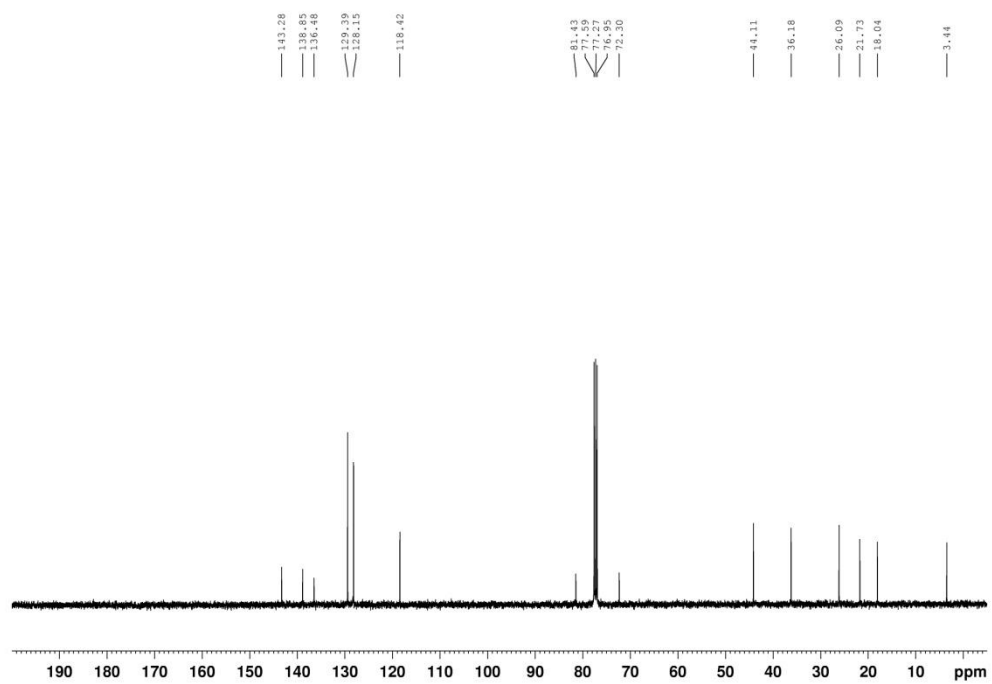

**<sup>1</sup>H NMR and <sup>13</sup>C NMR Spectra of the Products**

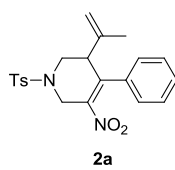



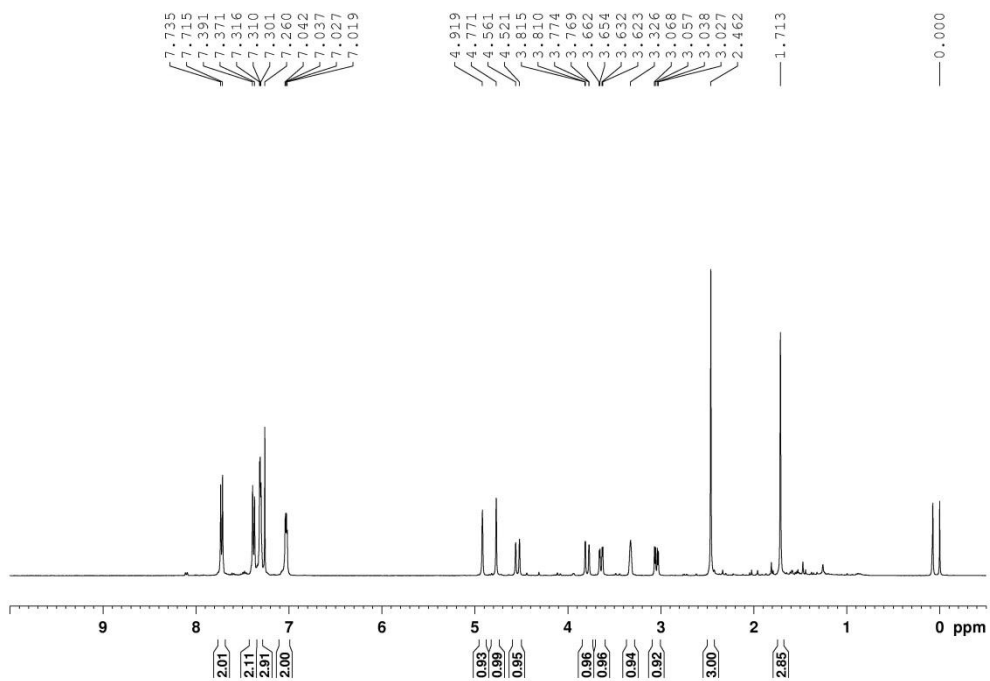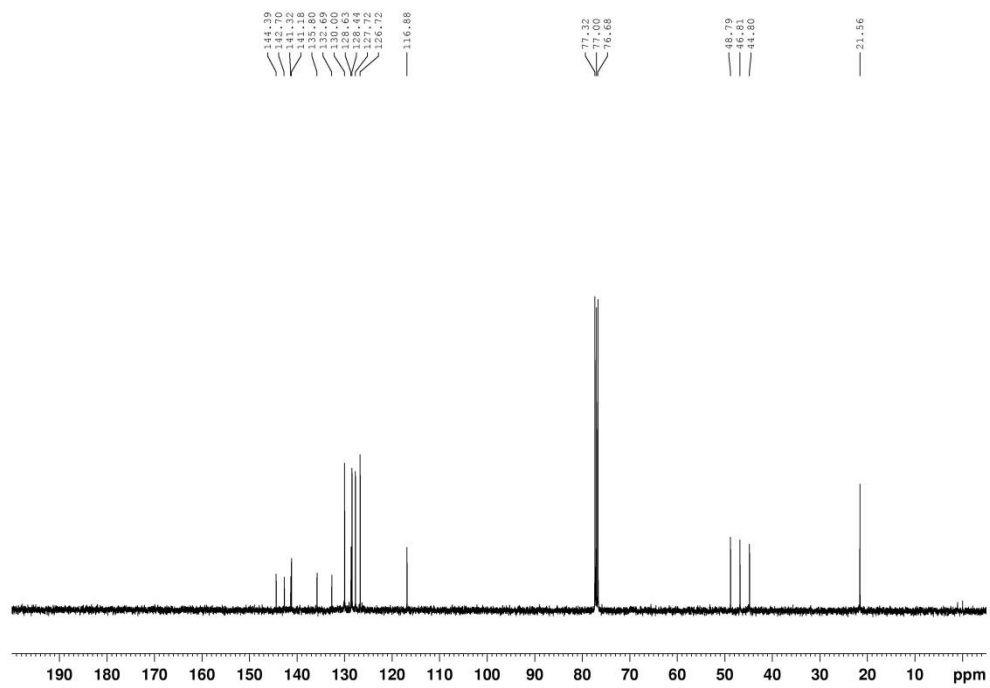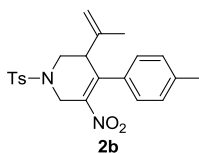

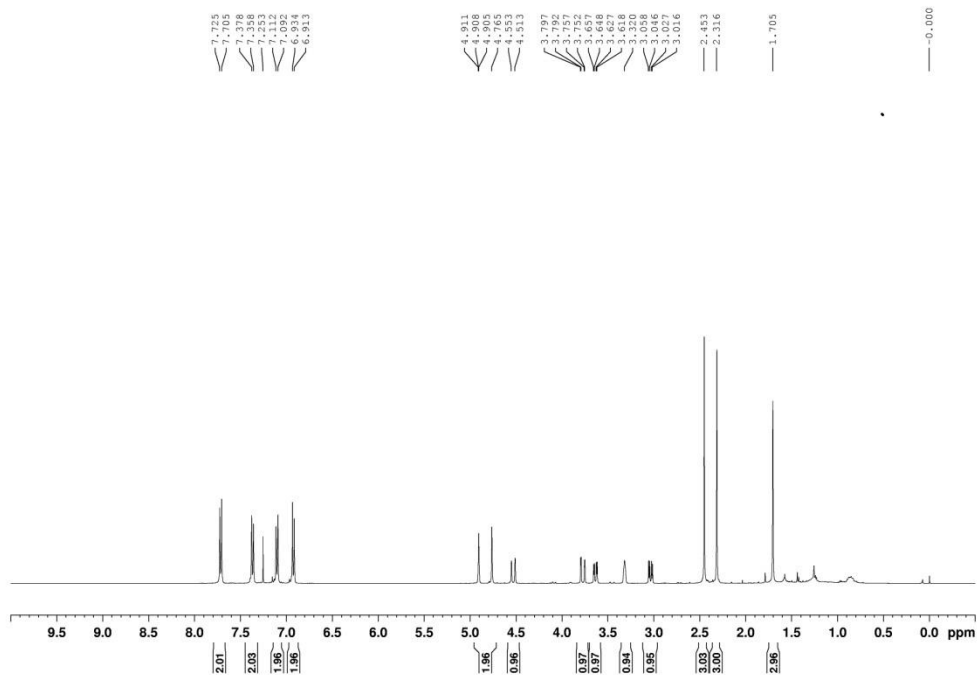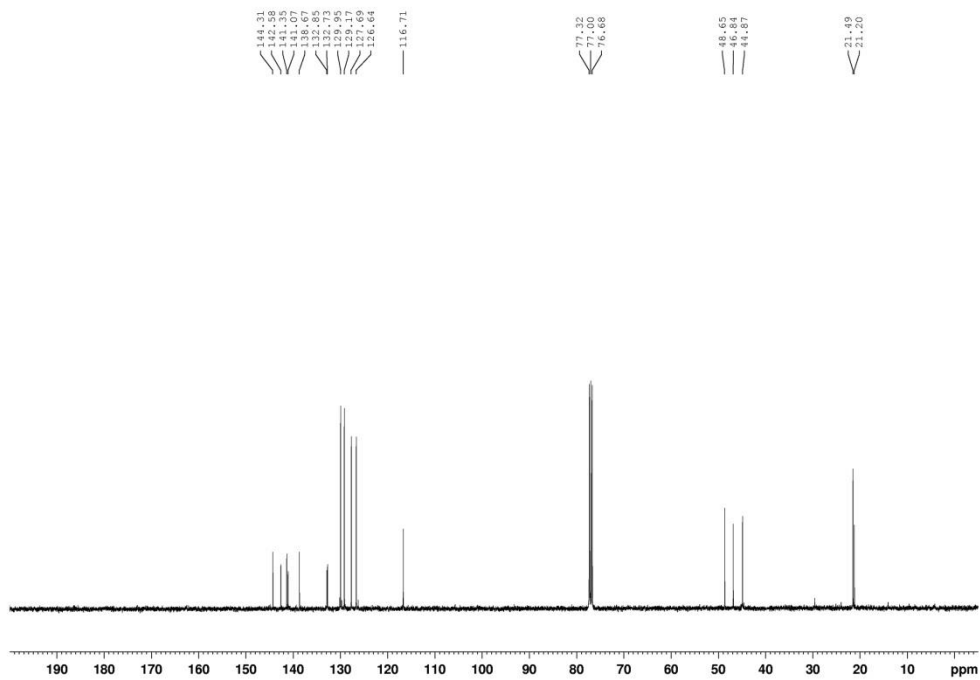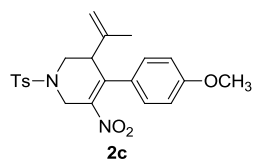

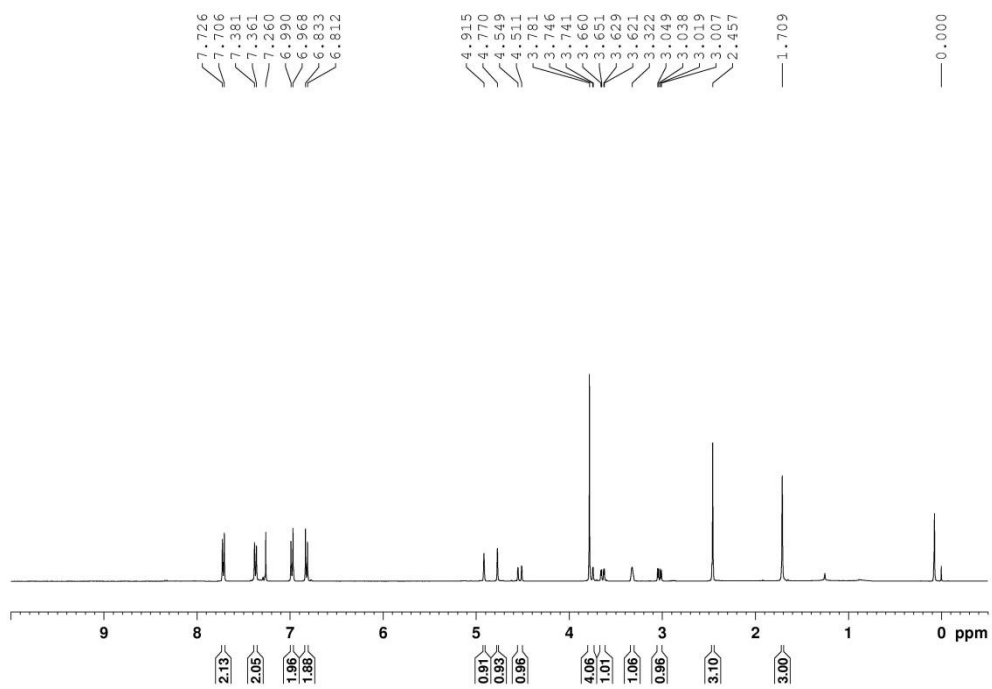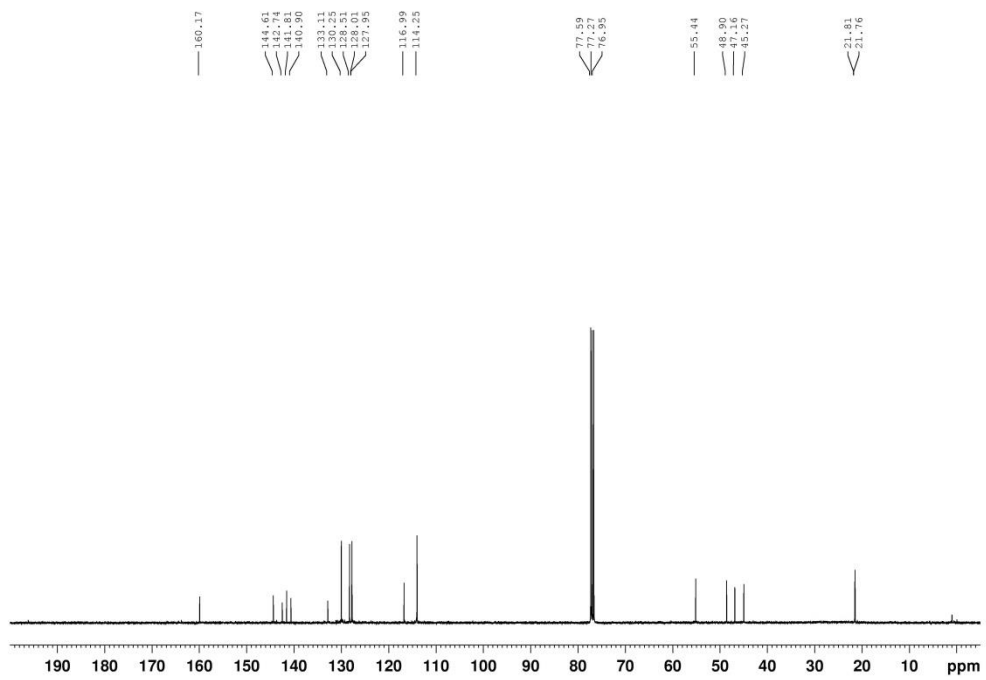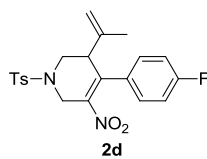

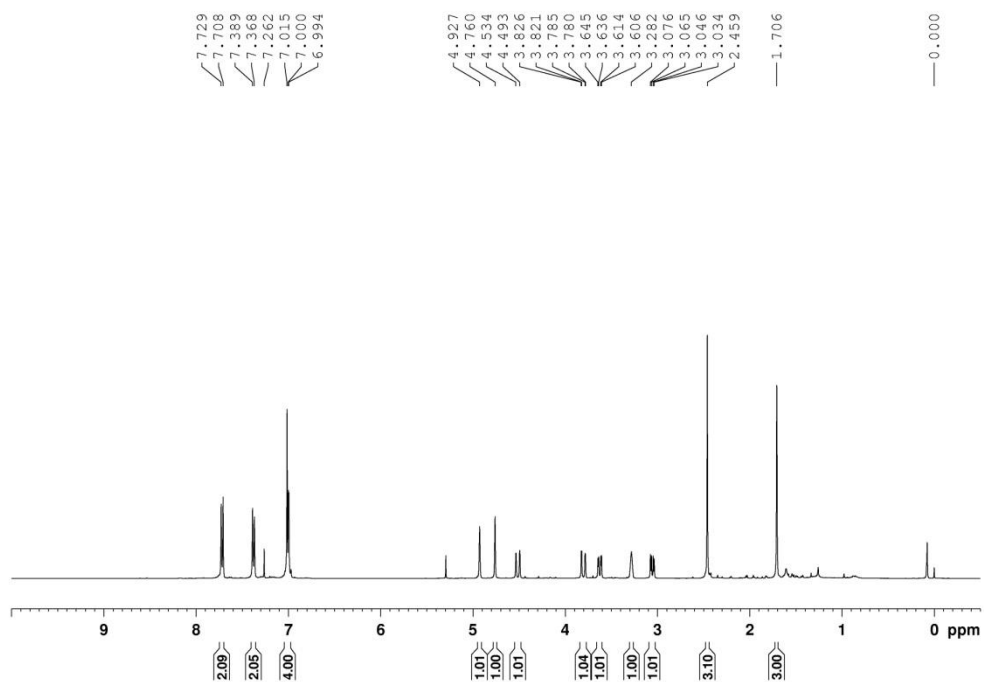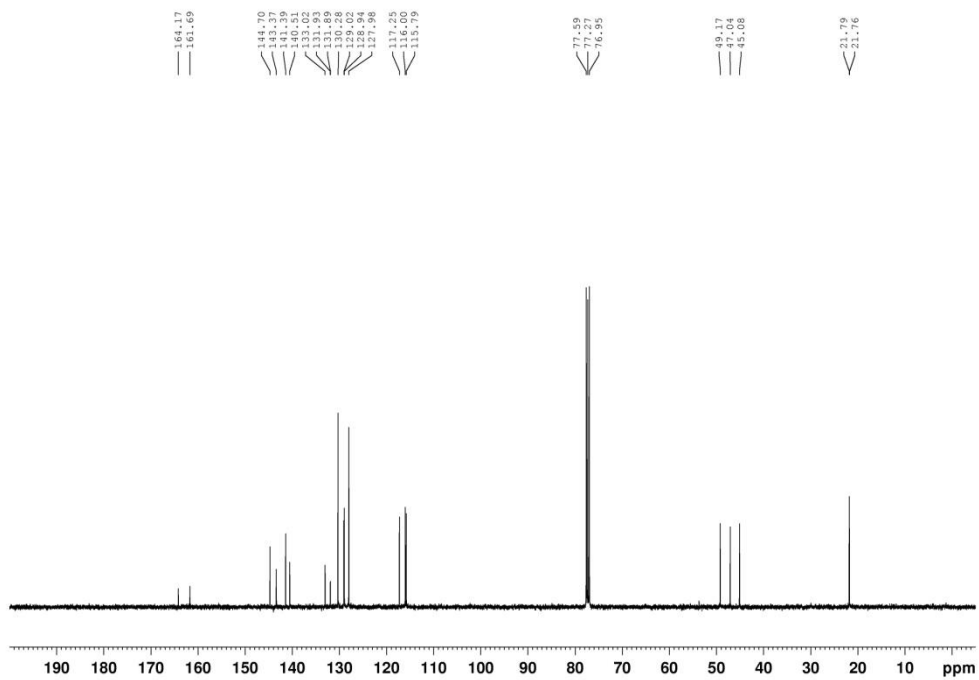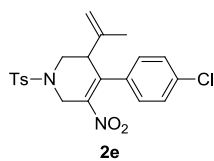

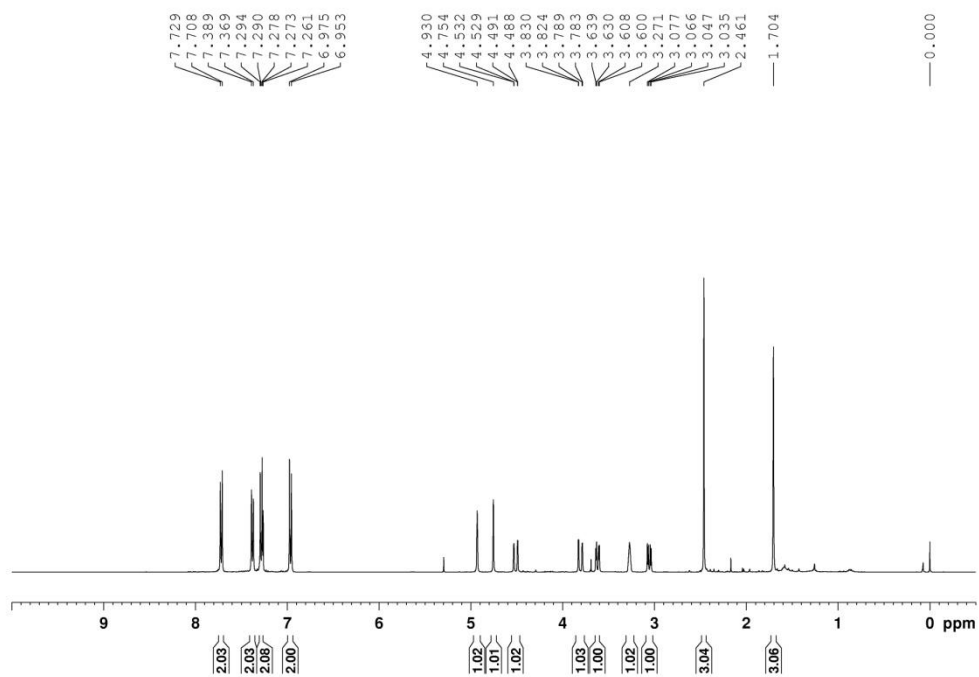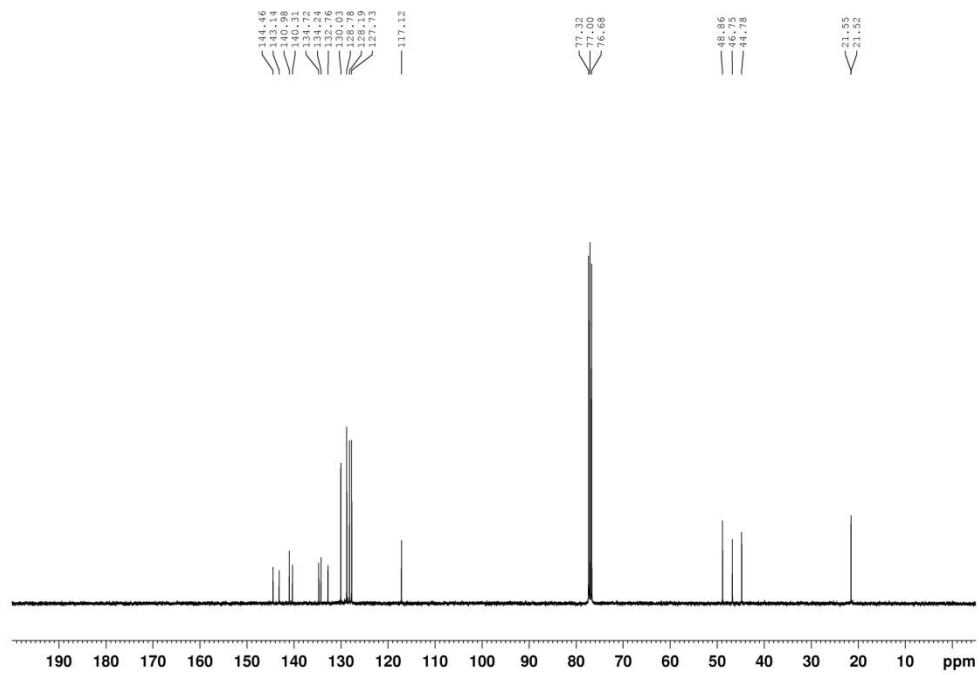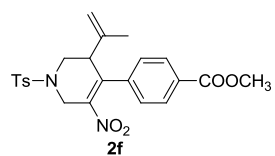

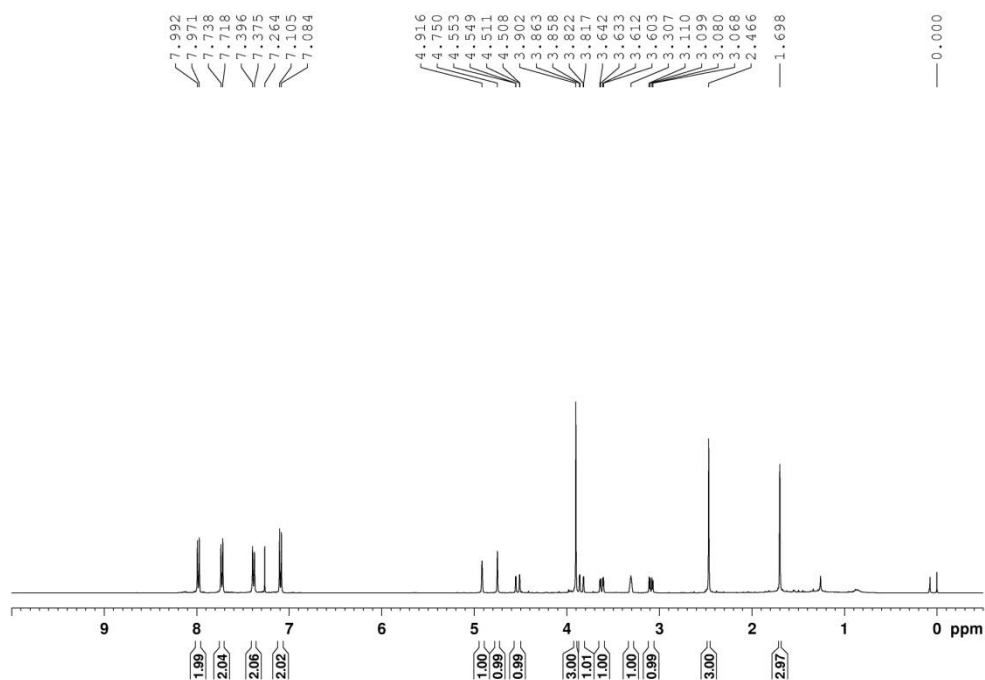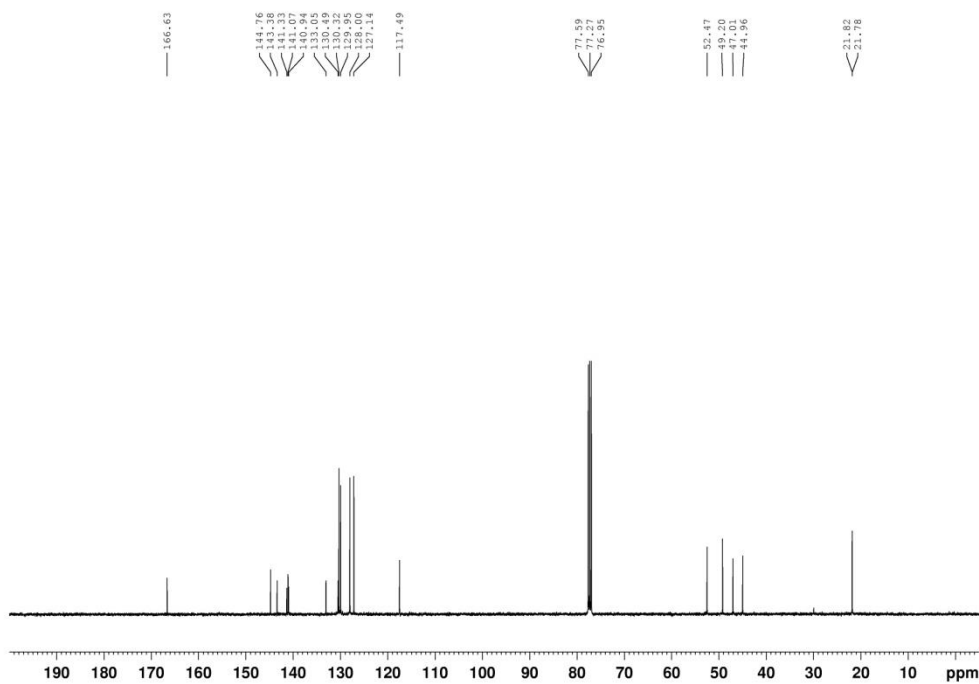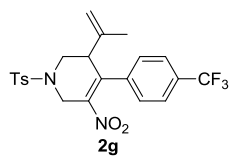

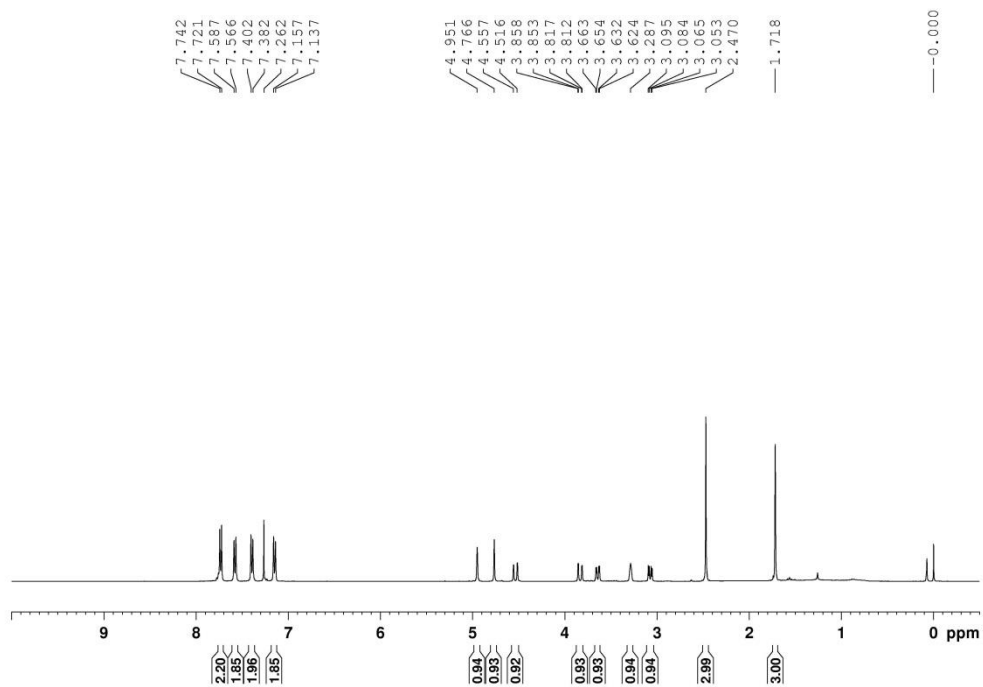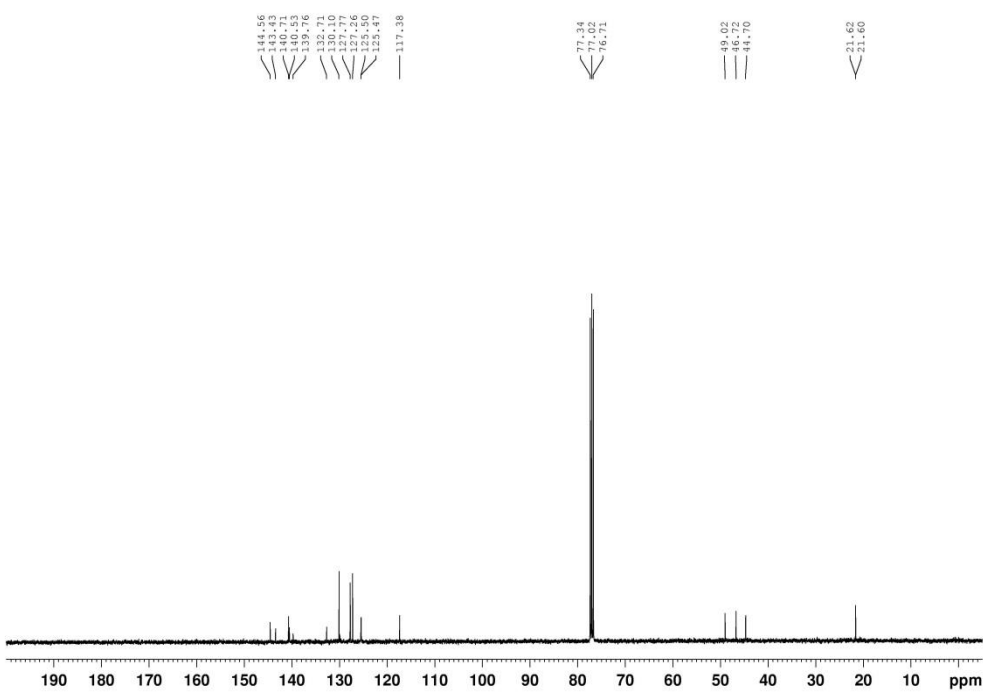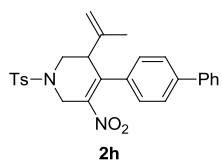

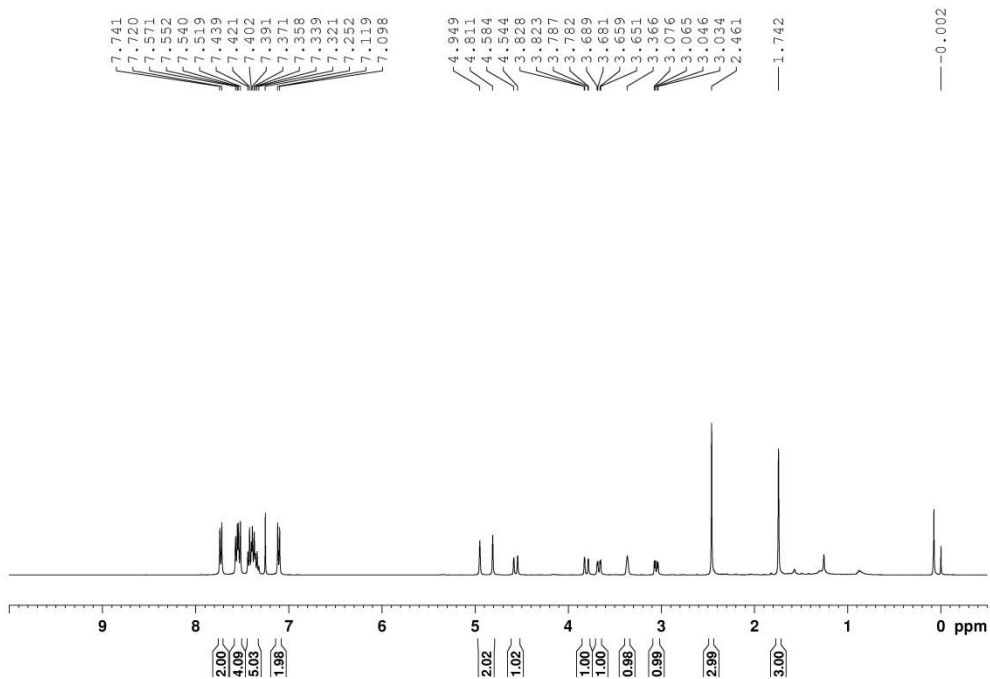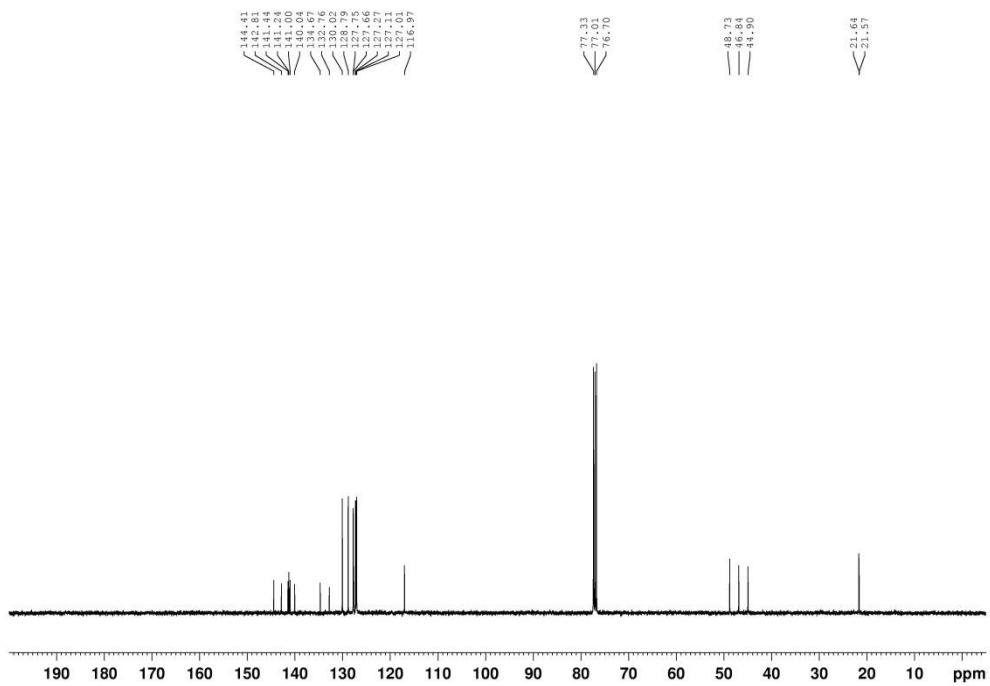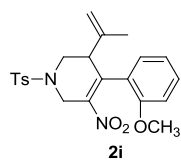



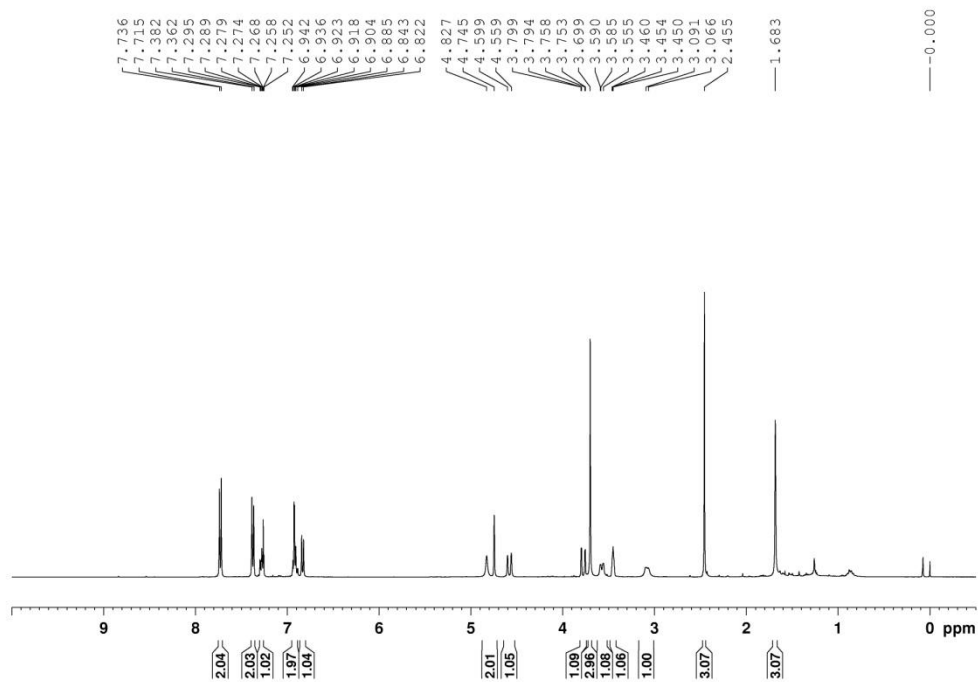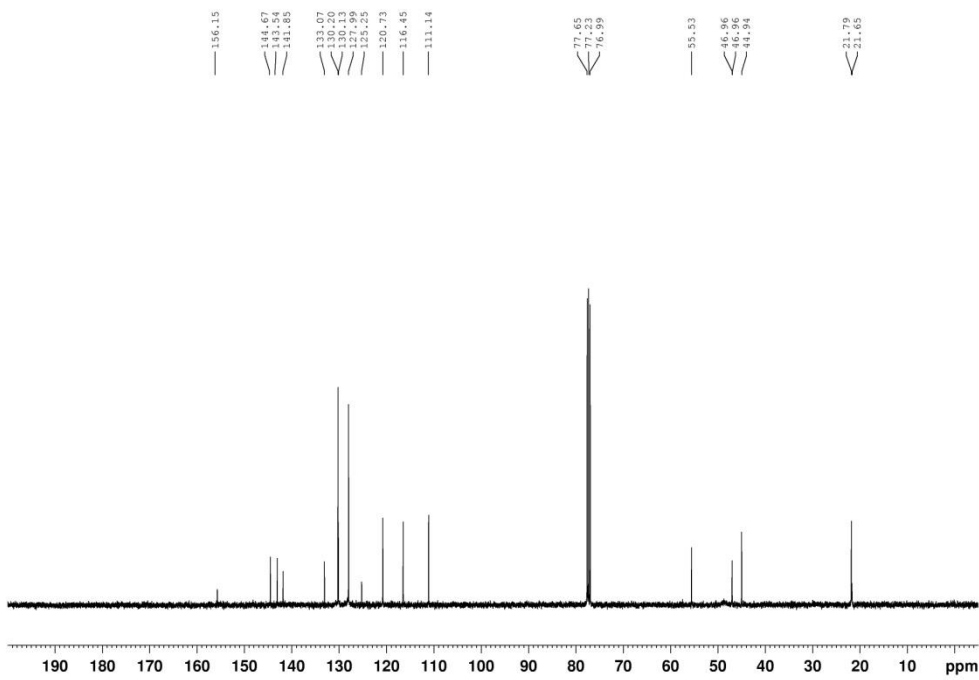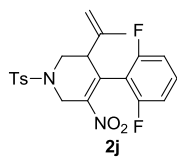

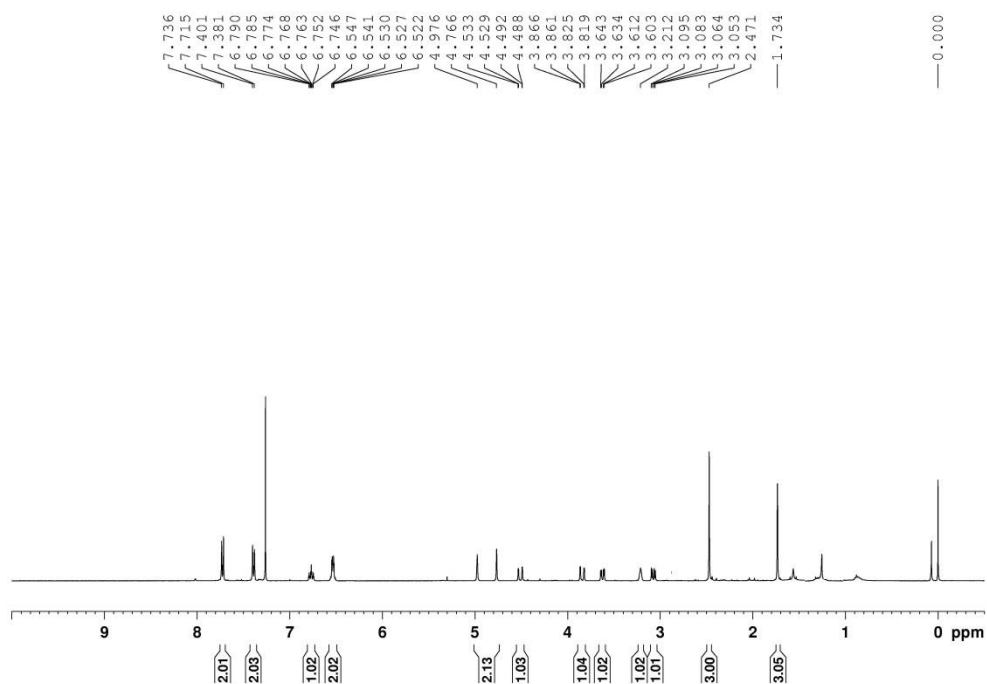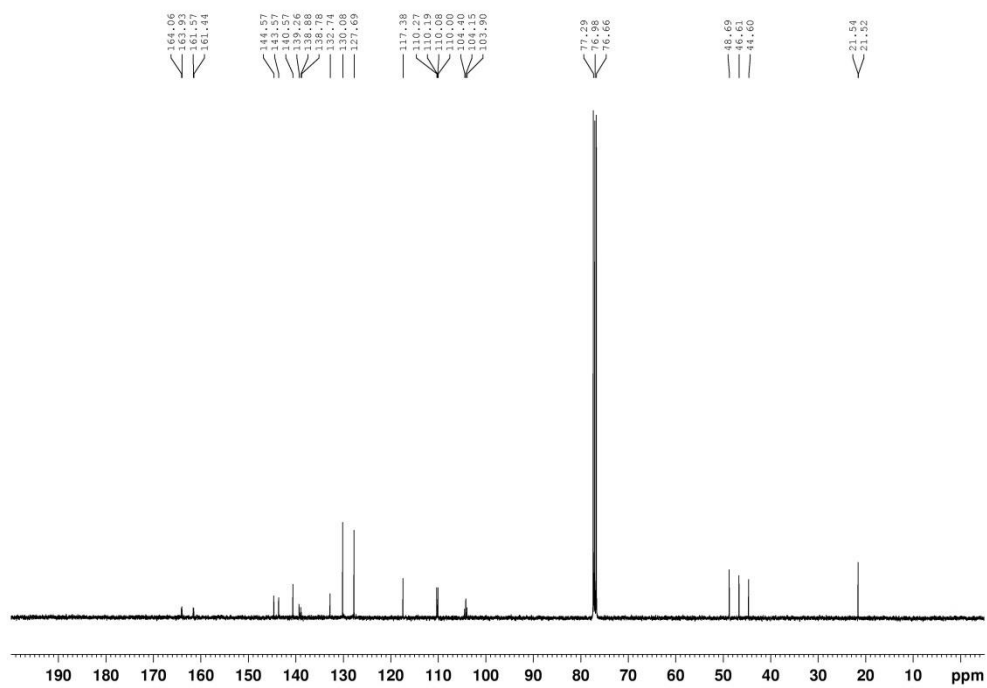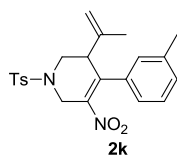

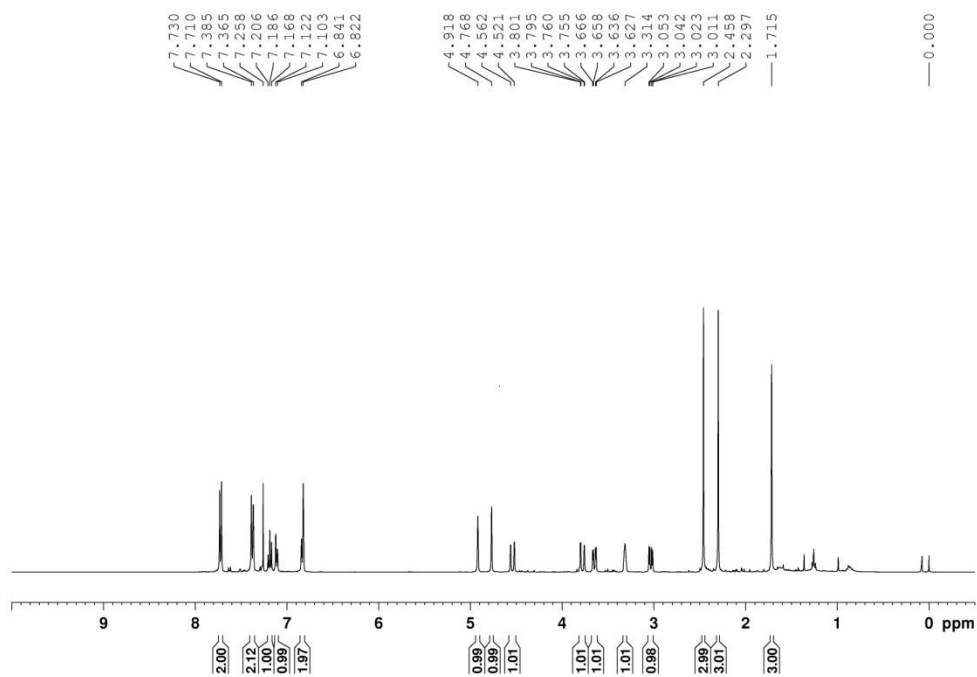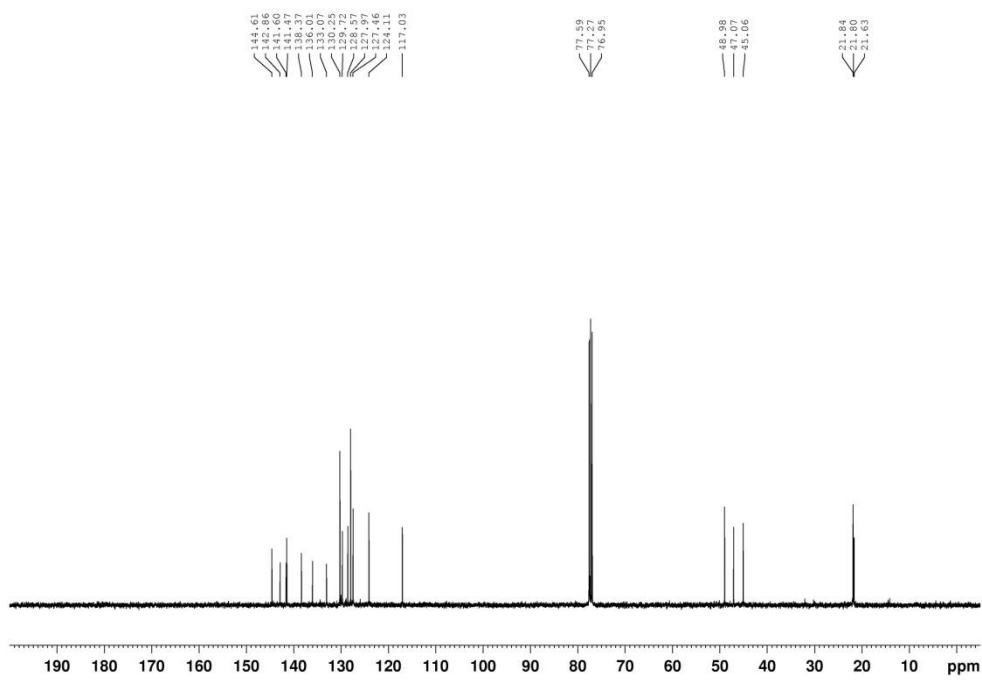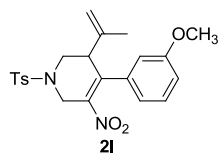

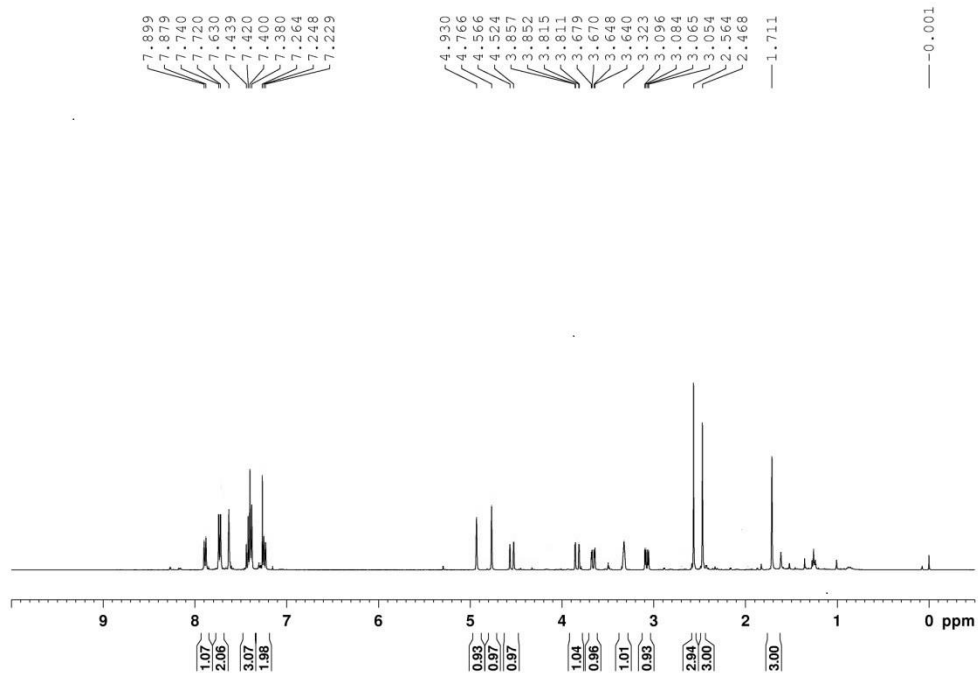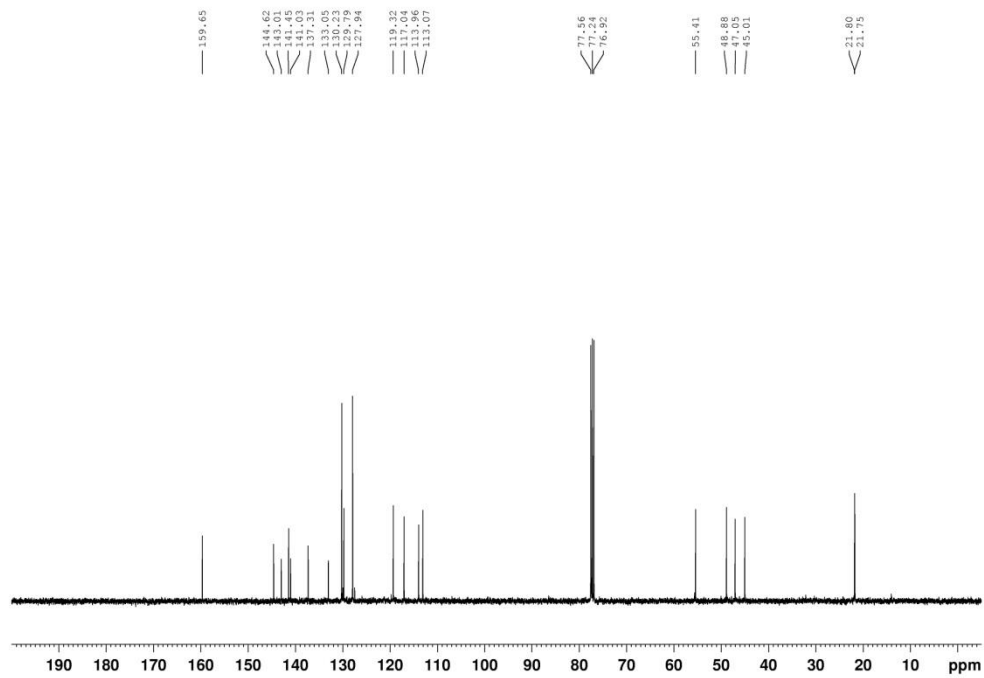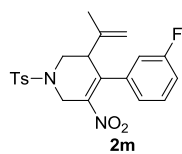

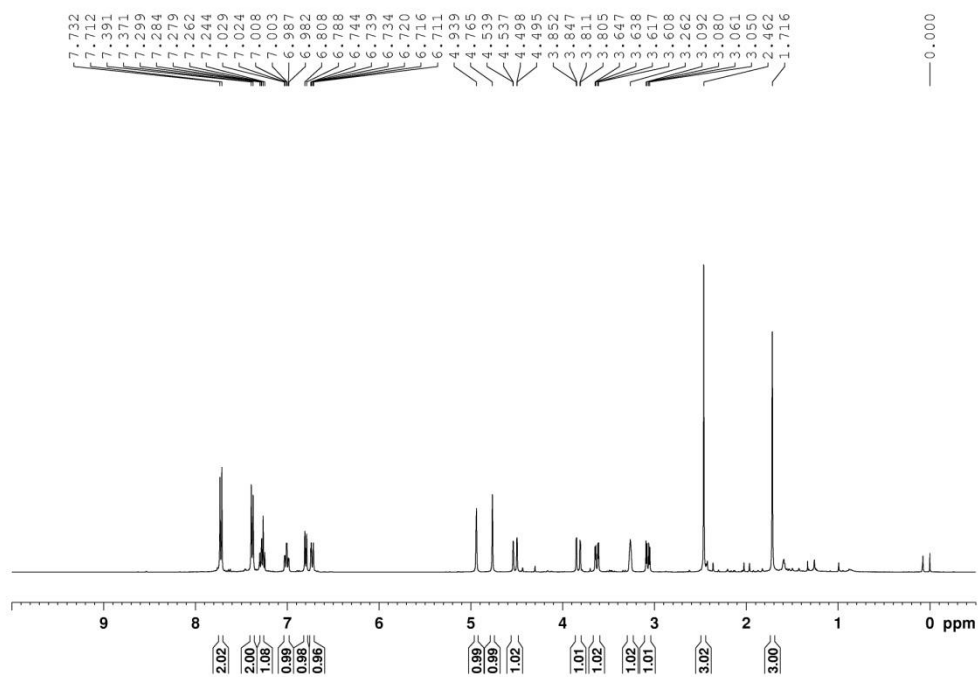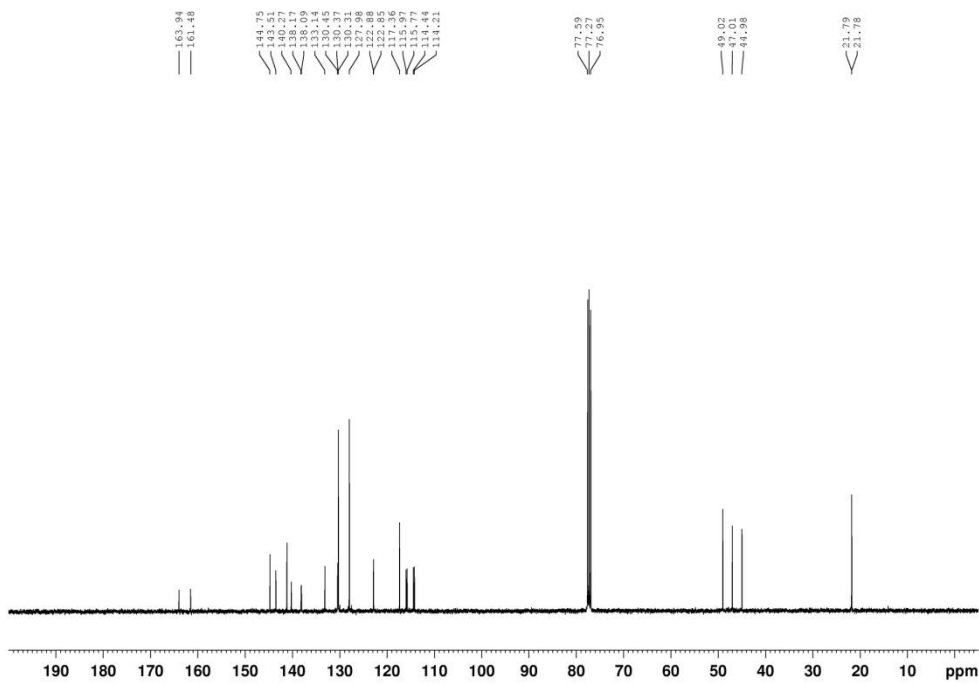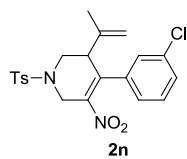

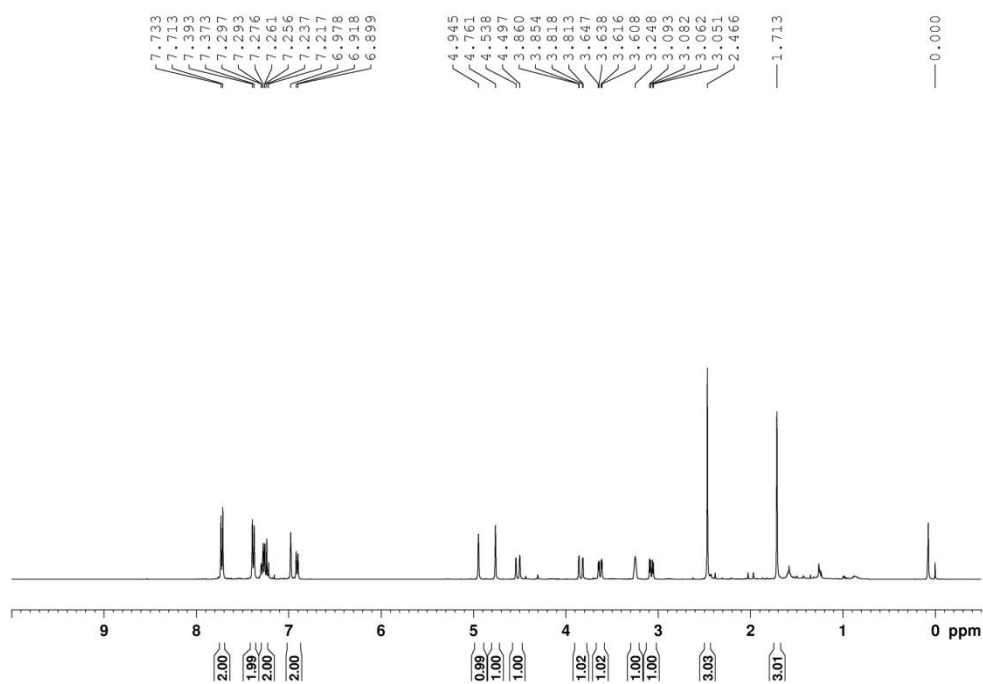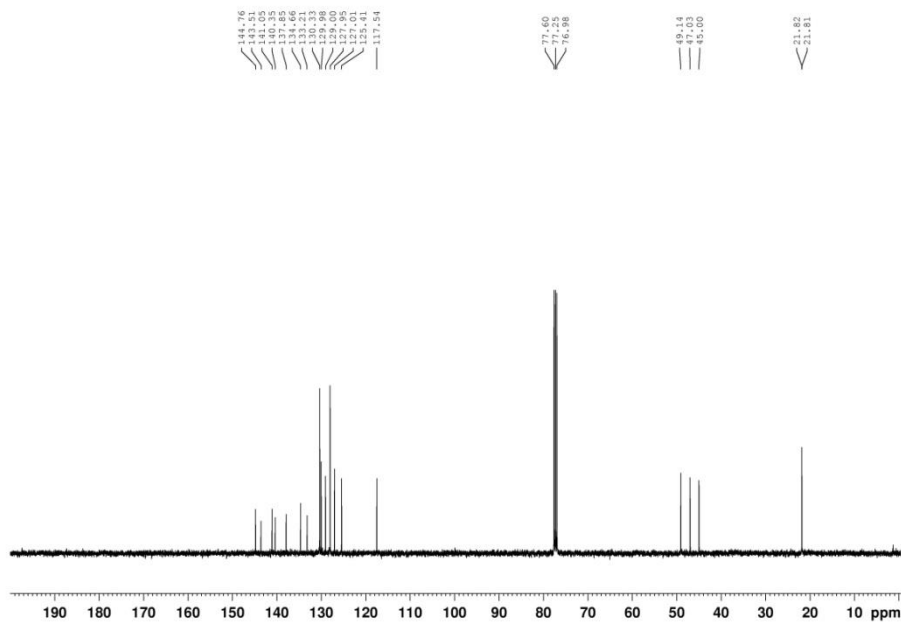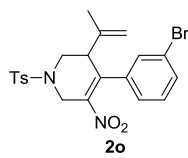

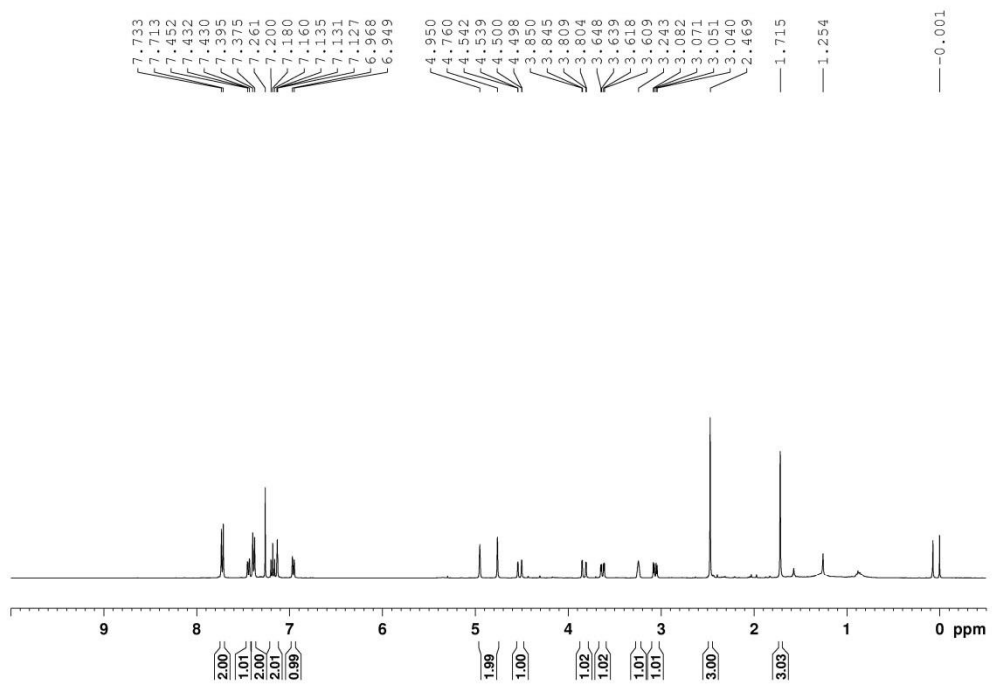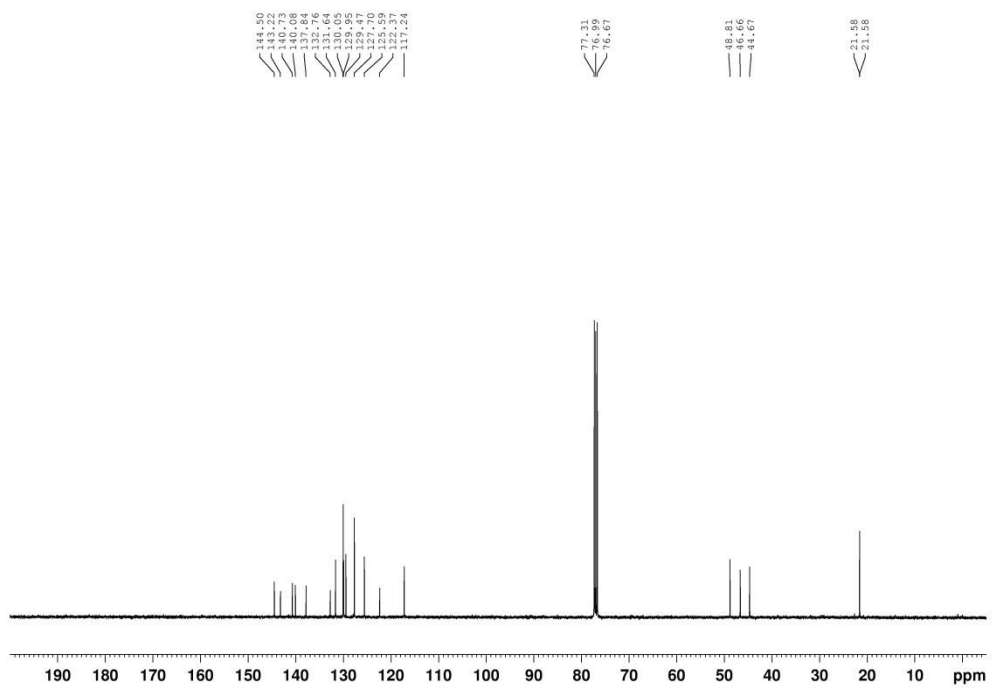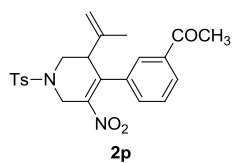

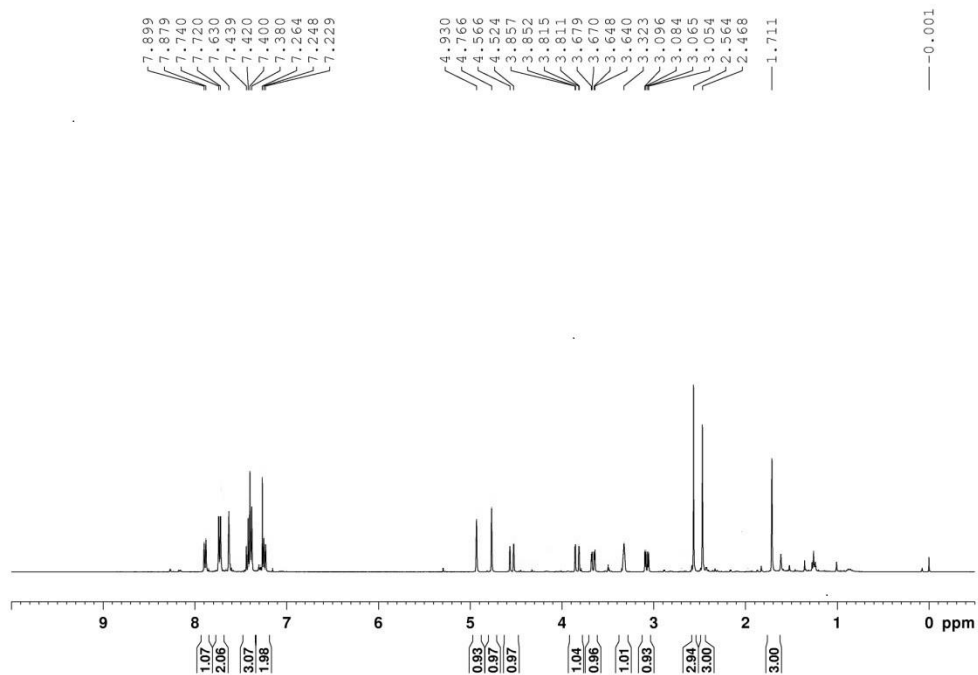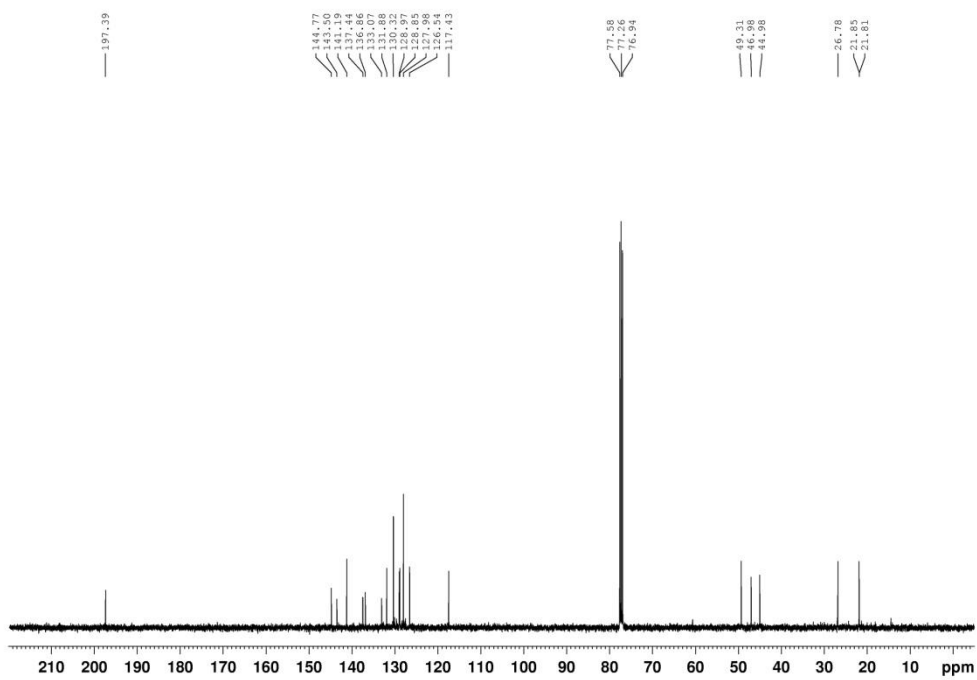



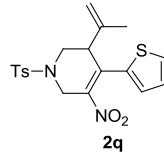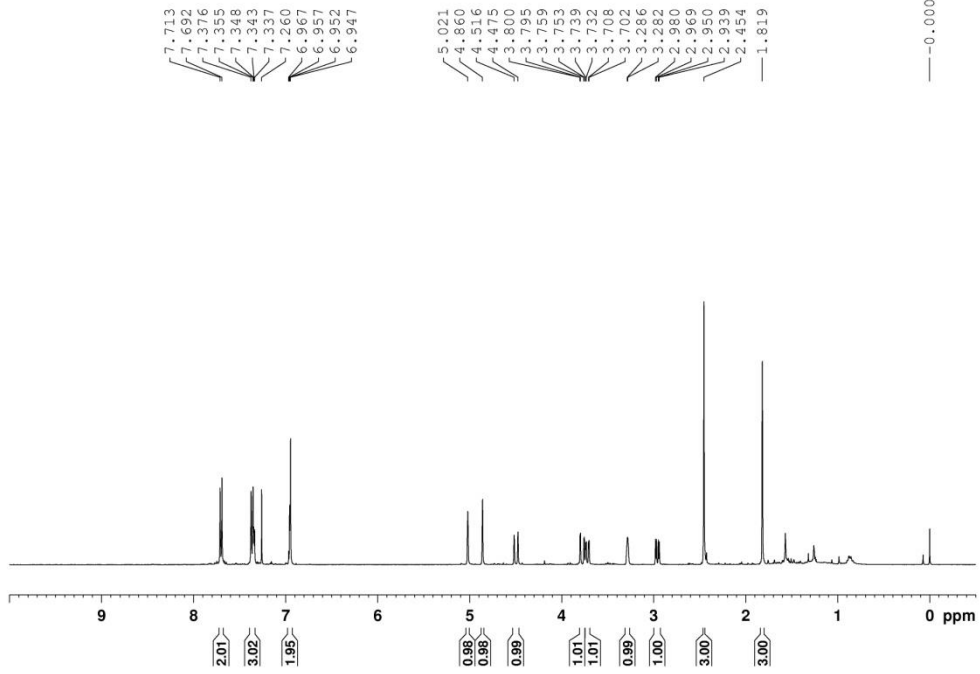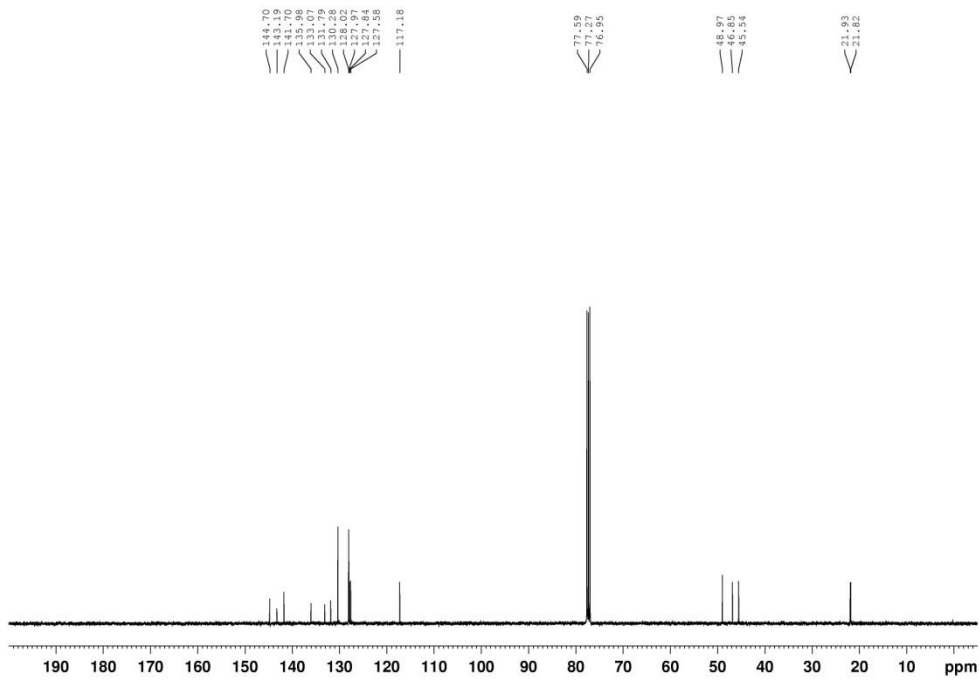

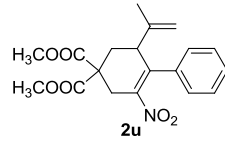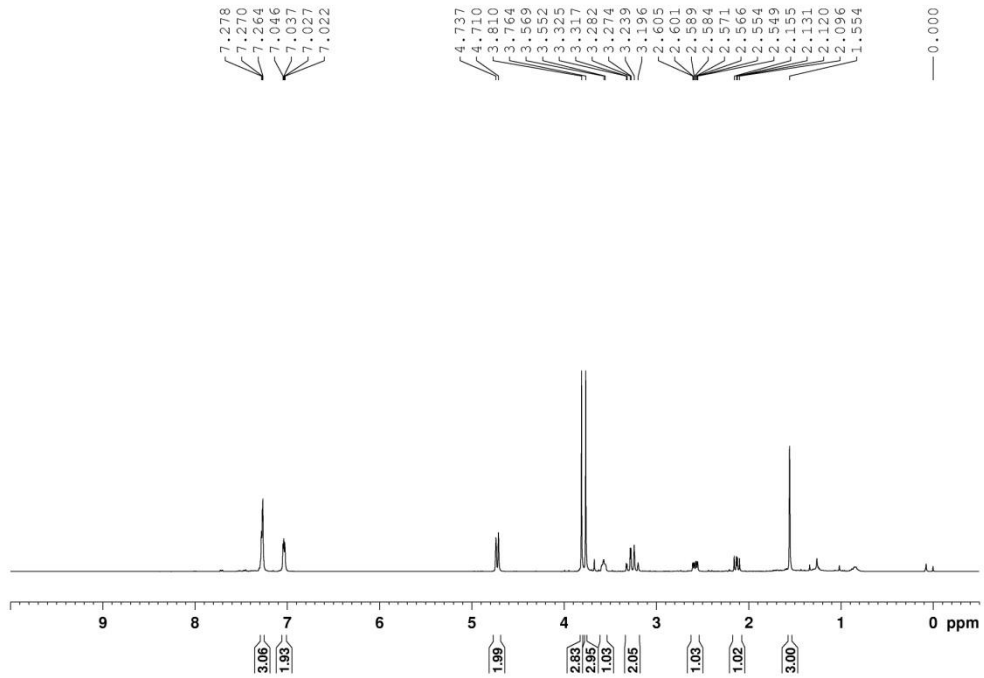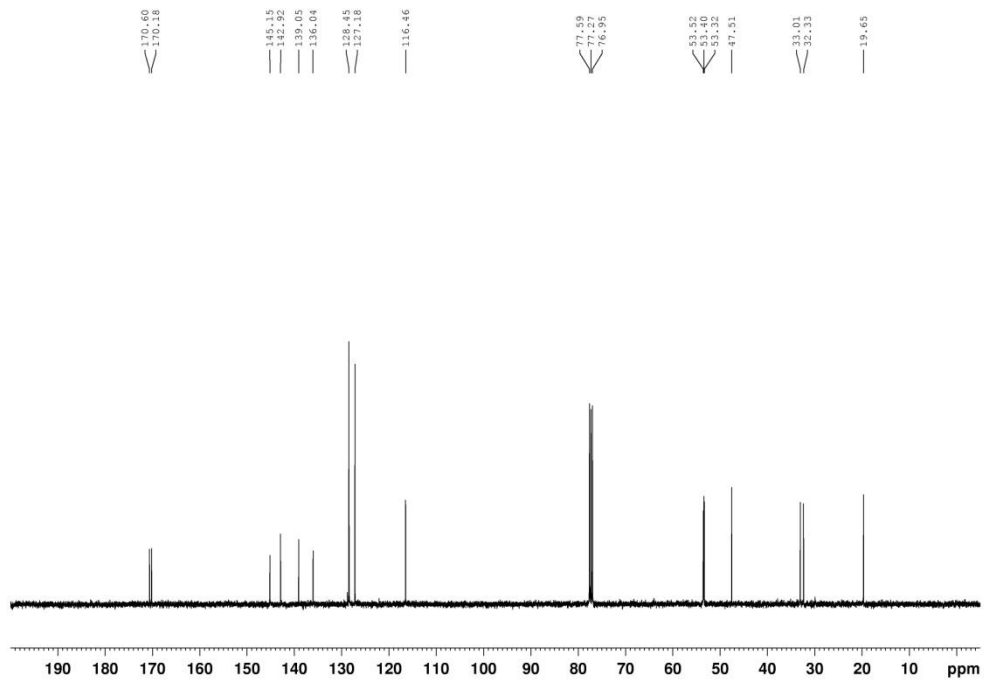

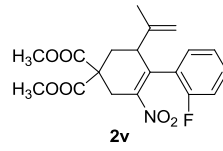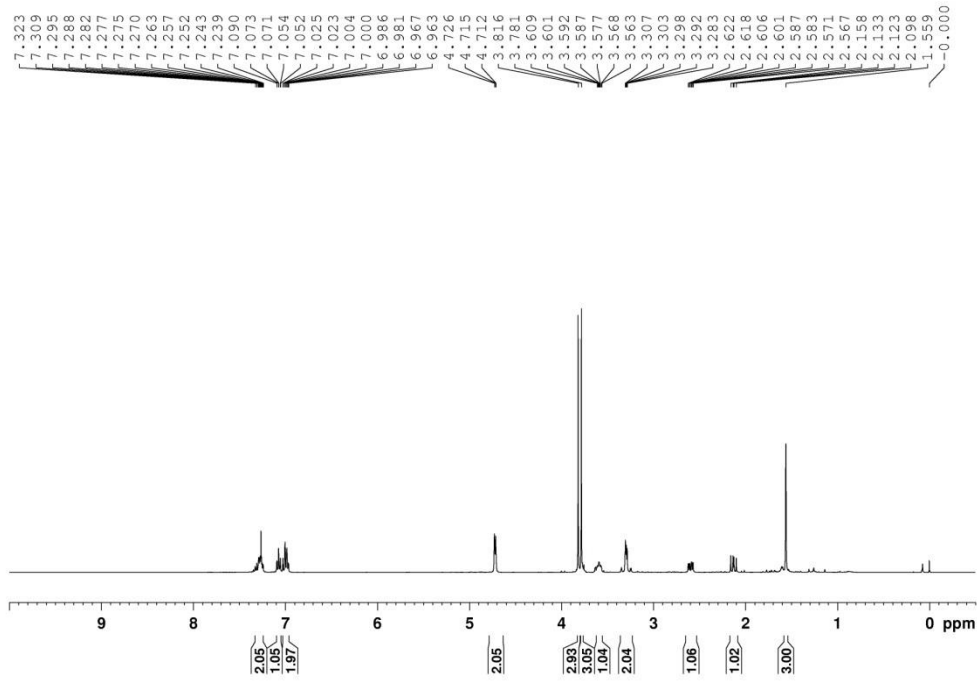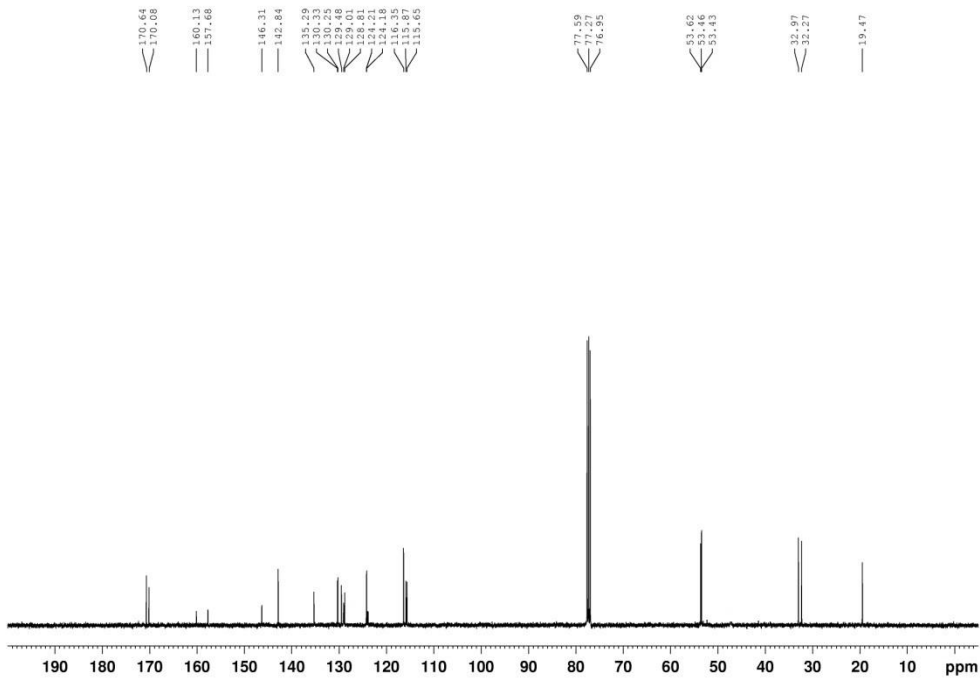

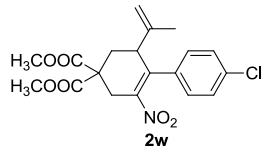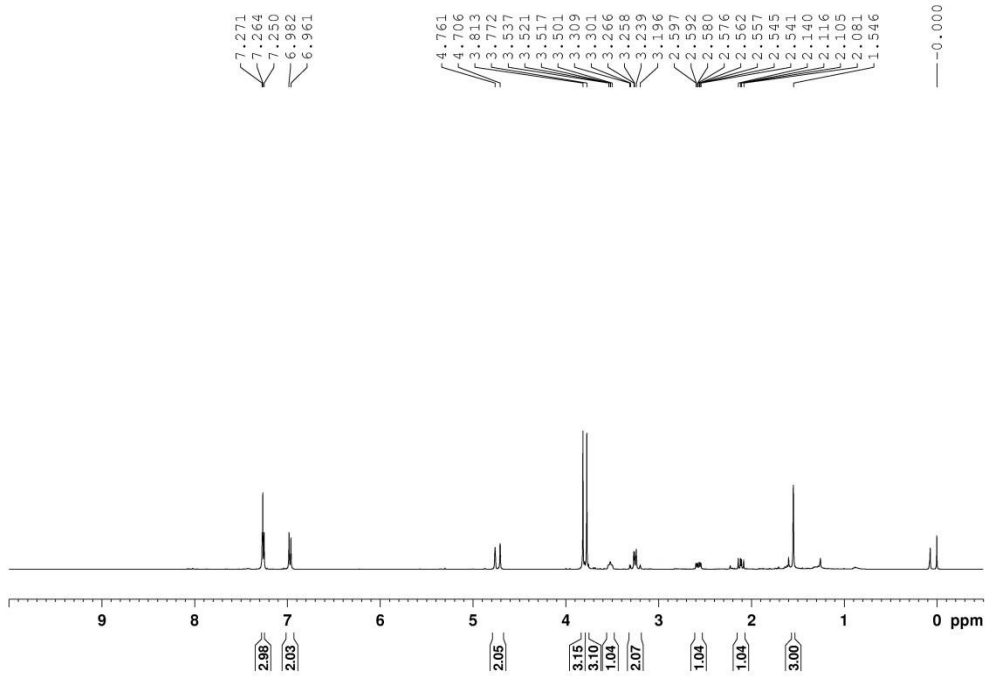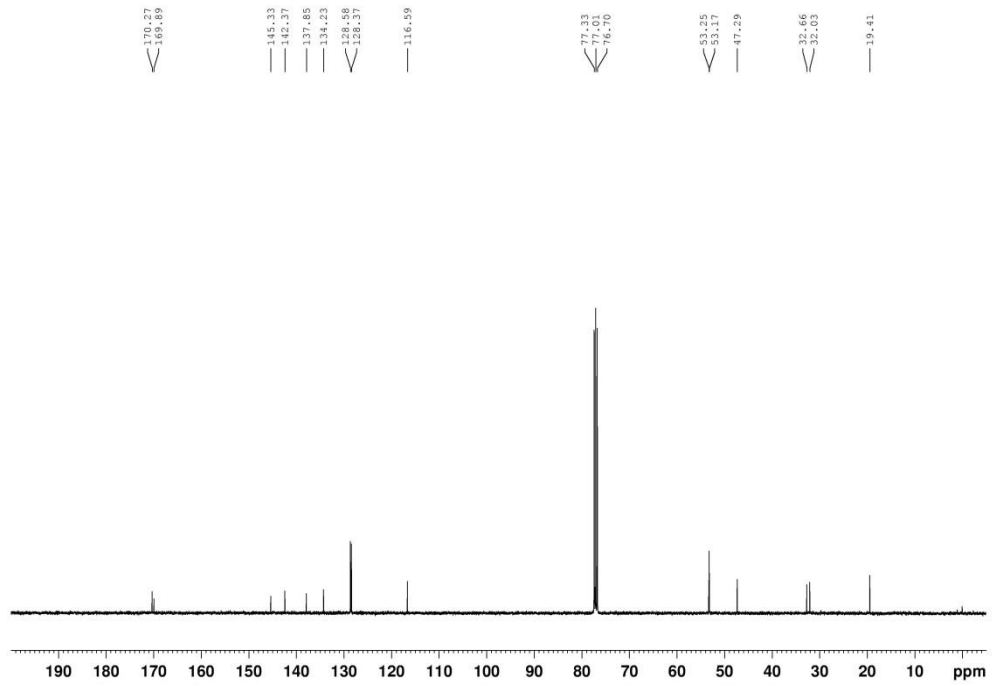

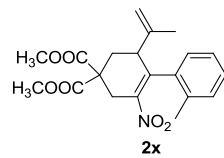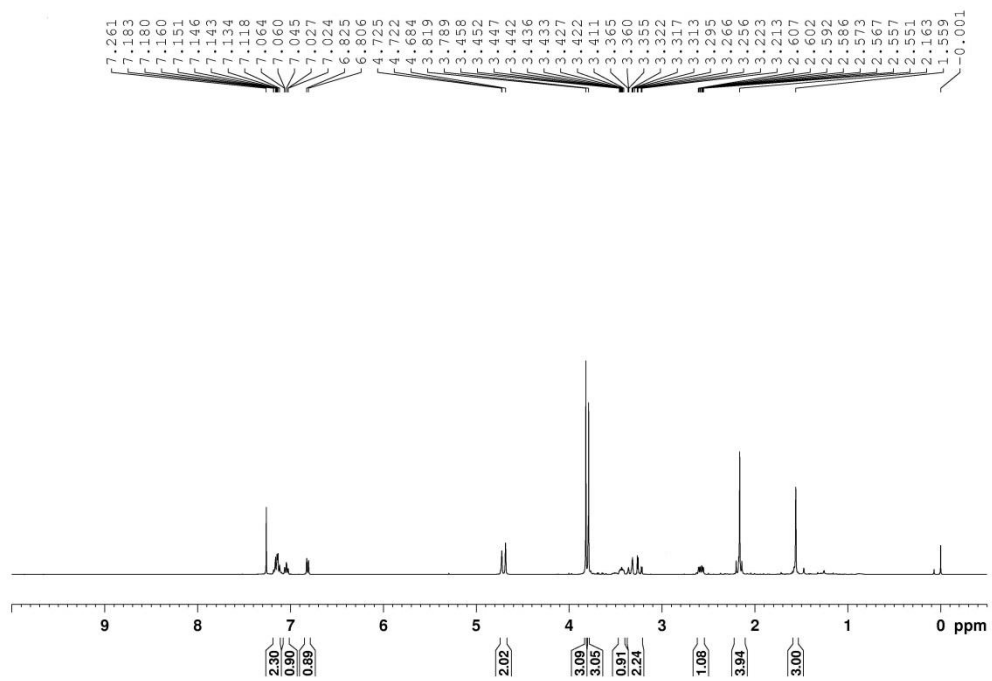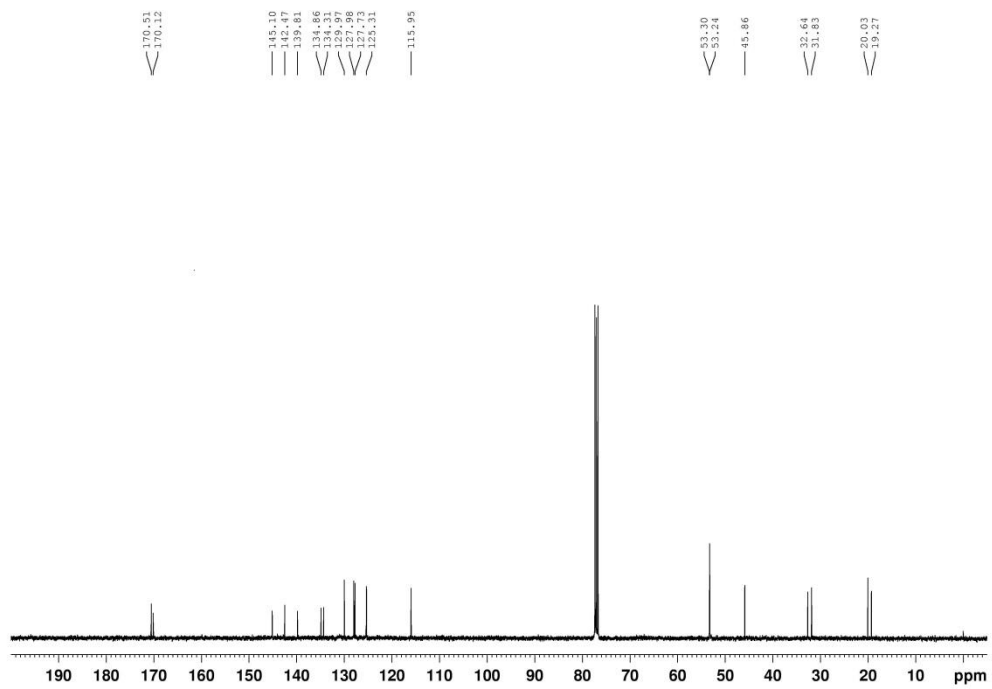

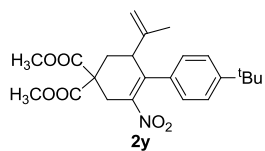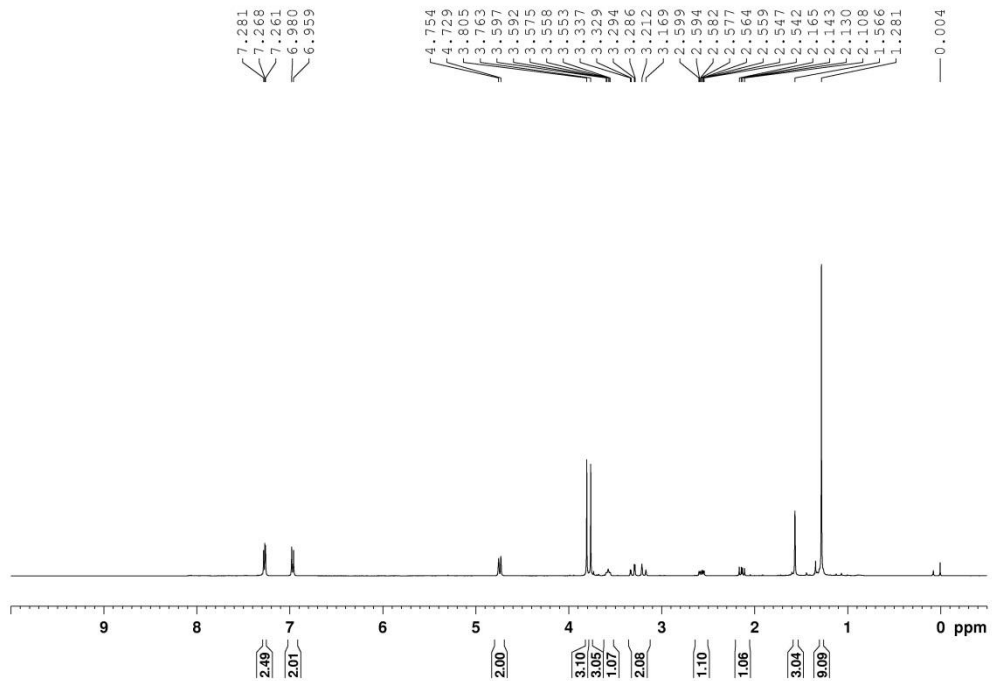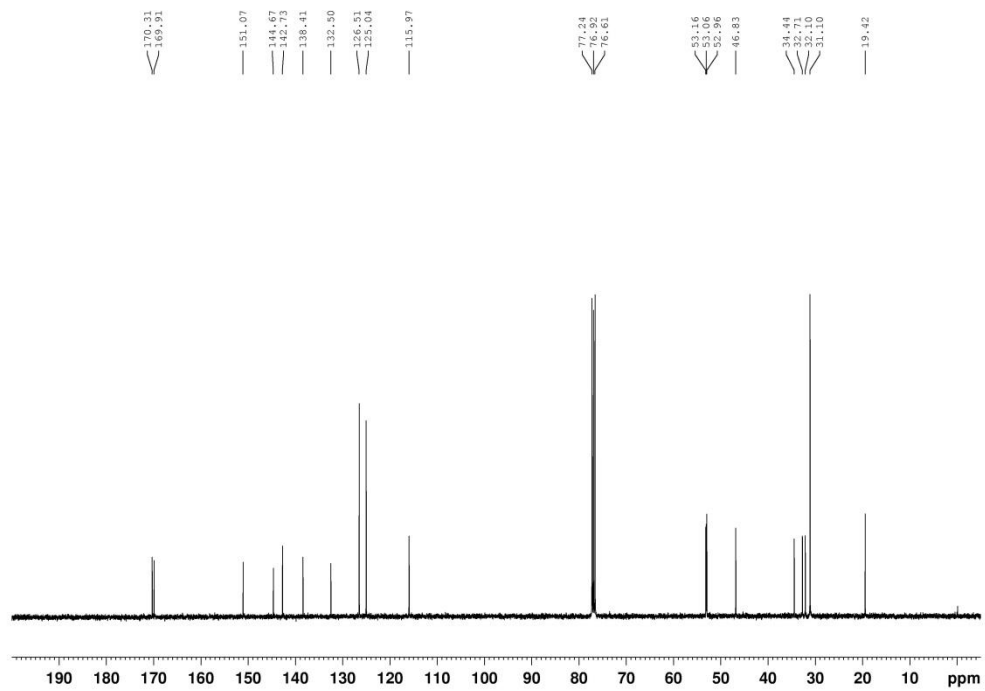

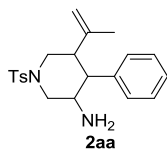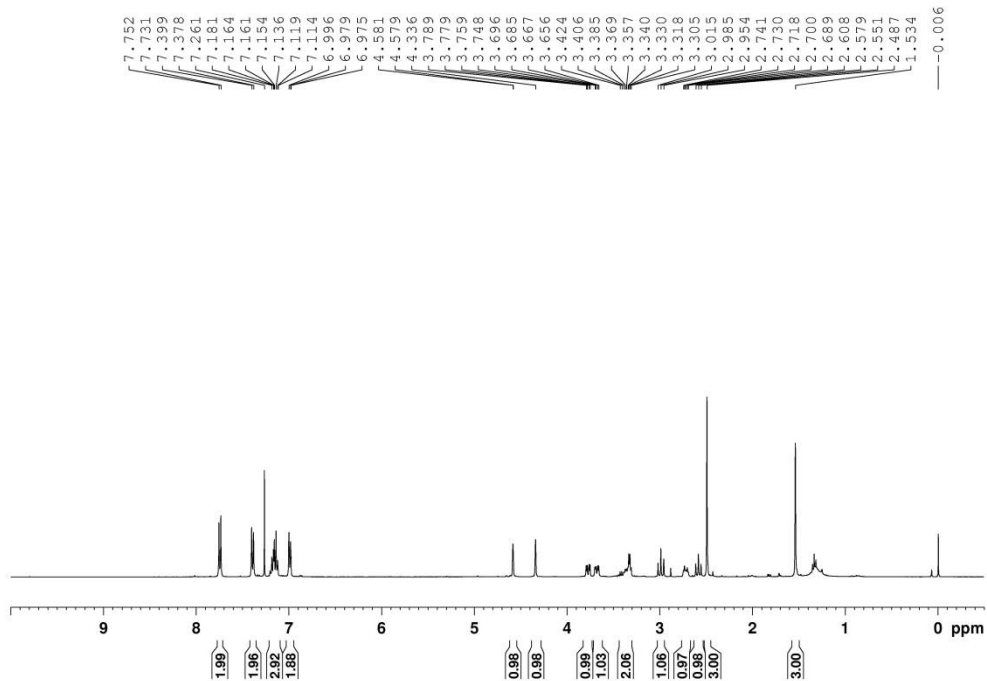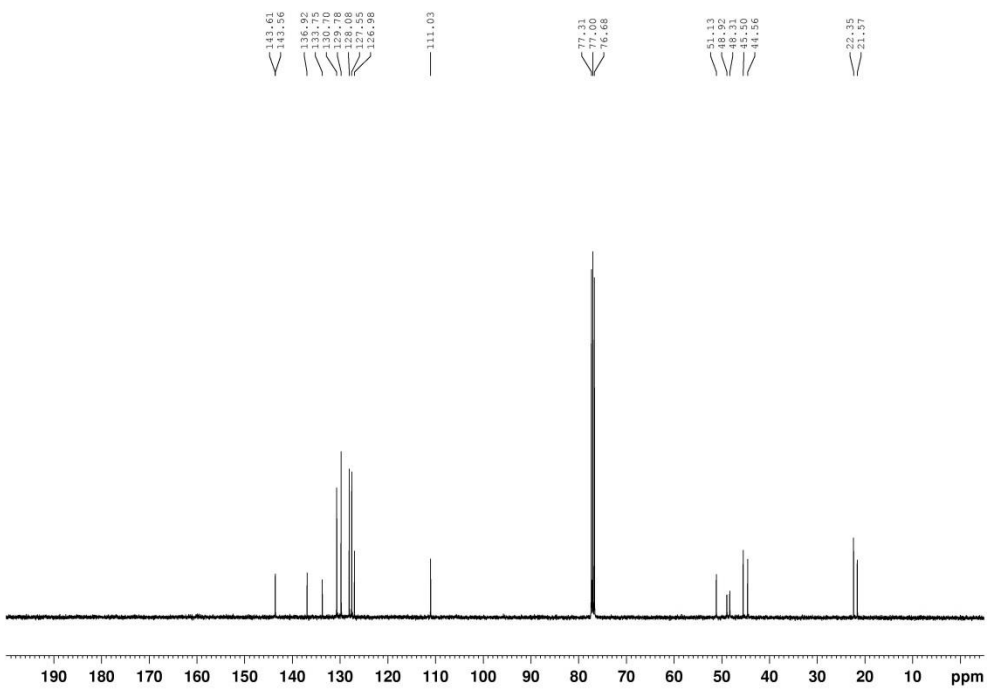

Supplement: c5cc00872g1.pdf [file c5cc00872g1.pdf]
